# Supplementary material for: Mechanistic insights into chloramphenicol-mediated inactivation of cytochrome P450 enzymes and their active site mutants
Source: Royal Society of Chemistry journal article supplement (doi:10.1039/d3nj02991c), 2023-01-01
Supplement: d3nj02991c1.pdf [file d3nj02991c1.pdf]

## Mechanistic insights into chloramphenicol-mediated inactivation of cytochrome P450 enzymes and their active site mutants.

Emadeldin M. Kamel<sup>a\*</sup>, Ahmed M. Tawfeek<sup>b</sup>, Ashraf A. El-Bassuony<sup>a</sup>, Al Mokhtar Lamsabhi<sup>c,d</sup>

<sup>a</sup>Chemistry Department, Faculty of Science, Beni-Suef University, Beni-Suef 62514, Egypt.

<sup>b</sup>Chemistry Department, College of Science, King Saud University, Riyadh, 11451, Saudi Arabia

<sup>c</sup>Departamento de Química, Módulo 13, Universidad Autónoma de Madrid, Campus de Excelencia UAM-CSIC Cantoblanco, Madrid 28049, Spain.

<sup>d</sup>Institute for Advanced Research in Chemical Sciences (IAdChem), Universidad Autónoma de Madrid, Madrid 28049, Spain.

Email: [emad.abdelhameed@science.bsu.edu.eg](mailto:emad.abdelhameed@science.bsu.edu.eg)

### Table of Contents

|                                                                                                                                                                                                                 |    |
|-----------------------------------------------------------------------------------------------------------------------------------------------------------------------------------------------------------------|----|
| Table S1. Relative energy (RE) (in kcal/mol) and atomic energy (in a.u.) at the B3LYP level of theory for the secondary amine hydroxylation of chloramphenicol by P450 (Cpd I) by HAT mechanism.....            | S3 |
| Table S2. Relative energy (RE) (in kcal/mol) and atomic energy (in a.u.) at the B3LYP level of theory for the secondary amine hydroxylation of chloramphenicol by P450 (Cpd I) by OAR mechanism.....            | S3 |
| Table S3. Relative energy (RE) (in kcal/mol) and atomic energy (in a.u.) at the B3LYP level of theory for C-H hydroxylation of chloramphenicol by P450 (Cpd I) through dichloromethane oxidation (Path B).....  | S4 |
| Table S4. Relative energy (RE) (in kcal/mol) and atomic energy (in a.u.) at the B3LYP level of theory for C-H hydroxylation of chloramphenicol by P450 (Cpd I) through Path C.....                              | S4 |
| Table S5. Relative energy (RE) (in kcal/mol) and atomic energy (in a.u.) at the B3LYP level of theory for C-H hydroxylation of chloramphenicol by P450 (Cpd I) through hydroxymethylene oxidation (Path D)..... | S5 |
| Table S6. Relative energy (RE) (in kcal/mol) and atomic energy (in a.u.) at the B3LYP level of theory for C-H hydroxylation of chloramphenicol by P450 (Cpd I) through hydroxymethylene oxidation (Path E)..... | S5 |
| Table S7. UB3LYP/BS1-calculated Mulliken group spin densities and group charges for the species in the N-hydroxylation of CP by the P450 mechanism through the HAT pathway.....                                 | S6 |

|                                                                                                                                                                                 |          |
|---------------------------------------------------------------------------------------------------------------------------------------------------------------------------------|----------|
| Table S8. UB3LYP/BS1-calculated Mulliken group spin densities and group charges for the species in the N-hydroxylation of CP by the P450 mechanism through the OAR pathway..... | S6       |
| Table S9. UB3LYP/BS1-calculated Mulliken group spin densities and group charges for the species in dichloromethylene oxidation of CP by the P450(Path B).....                   | S6       |
| Table S10. UB3LYP/BS1-calculated Mulliken group spin densities and group charges for the species in C-H hydroxylation of CP by the P450 (Path C).....                           | S7       |
| Table S11. UB3LYP/BS1-calculated Mulliken group spin densities and group charges for the species in $\beta$ -Hydroxymethylene oxidation of CP by the P450 (Path D).....         | S7       |
| Table S12. UB3LYP/BS1-calculated Mulliken group spin densities and group charges for the species in $\alpha$ -Hydroxymethylene oxidation of CP by the P450 (Path E).....        | S7       |
| Figure S1. Molecular representation of the electronic density of some BCPs (in a.u.) of the intermediates of Paths A-E.....                                                     | S8       |
| Figure S2. Transition states outputs of all studied pathways.....                                                                                                               | S9       |
| Figure S3. Computed intrinsic reaction coordinate (IRC) of the rate-determining step transition states in paths A, B, C, D, and E.....                                          | 10       |
| Cartesian coordinates of all structures represented in this study.....                                                                                                          | S11-S100 |

**Table S1. Relative energy (RE) (in kcal/mol) and atomic energy (in a.u.) at the B3LYP level of theory for the secondary amine hydroxylation of chloramphenicol by P450 (Cpd I) by HAT mechanism.**

|                                  | UB3LYP/BS1   |       | UB3LYP/BS1+ZPE |       | UB3LYP/BS2//BS1 |       | UB3LYP/BS2//BS1+ZPE |       | UB3LYP/BS2//BS1 +Bulk Polarity |       | UB3LYP/BS2//BS1+ZPE+Bulk Polarity |       |
|----------------------------------|--------------|-------|----------------|-------|-----------------|-------|---------------------|-------|--------------------------------|-------|-----------------------------------|-------|
|                                  | AE           | RE    | AE             | RE    | AE              | RE    | AE                  | RE    | AE                             | RE    | AE                                | RE    |
| <sup>2</sup> RC <sub>H</sub>     | -3417.531146 | 0.00  | -3417.005725   | 0.00  | -3418.754758    | 0.00  | -3418.229337        | 0.00  | -3418.778710                   | 0.00  | -3418.253289                      | 0.00  |
| <sup>4</sup> RC <sub>H</sub>     | -3417.528216 | 1.84  | -3417.003287   | 1.53  | -3418.752321    | 1.53  | -3418.227392        | 1.22  | -3418.776744                   | 1.23  | -3418.251815                      | 0.93  |
| <sup>2</sup> TS <sub>H</sub>     | -3417.509421 | 13.63 | -3416.987057   | 11.71 | -3418.718921    | 22.49 | -3418.196557        | 20.57 | -3418.742421                   | 22.77 | -3418.220057                      | 20.85 |
| <sup>4</sup> TS <sub>H</sub>     | -3417.510479 | 12.97 | -3416.989019   | 10.48 | -3418.717479    | 23.39 | -3418.198019        | 19.65 | -3418.740479                   | 23.99 | -3418.221019                      | 20.25 |
| <sup>2</sup> INT <sub>H</sub>    | -3417.523530 | 4.78  | -3417.009527   | -2.39 | -3418.746122    | 5.42  | -3418.222119        | 4.53  | -3418.756194                   | 14.13 | -3418.242191                      | 6.96  |
| <sup>4</sup> INT <sub>H</sub>    | -3417.532300 | -0.72 | -3417.011417   | -3.57 | -3418.744208    | 6.62  | -3418.223325        | 3.77  | -3418.765555                   | 8.26  | -3418.244672                      | 5.41  |
| <sup>2</sup> TS-reb <sub>H</sub> | -3417.480388 | 31.85 | -3416.958016   | 29.94 | -3418.708231    | 29.20 | -3418.185859        | 27.28 | -3418.729772                   | 30.71 | -3418.207400                      | 28.80 |
| <sup>4</sup> TS-reb <sub>H</sub> | -3417.476469 | 34.31 | -3416.953862   | 32.54 | -3418.708539    | 29.00 | -3418.185932        | 27.24 | -3418.729505                   | 30.88 | -3418.206898                      | 29.11 |
| <sup>2</sup> P-OH                | -3417.522315 | 5.54  | -3416.996747   | 5.63  | -3418.764395    | -6.05 | -3418.238827        | -5.95 | -3418.787917                   | -5.78 | -3418.262349                      | -5.68 |
| <sup>4</sup> P-OH                | -3417.524411 | 4.23  | -3416.999297   | 4.03  | -3418.767039    | -7.71 | -3418.241925        | -7.90 | -3418.792359                   | -8.56 | -3418.267245                      | -8.76 |

**Table S2. Relative energy (RE) (in kcal/mol) and atomic energy (in a.u.) at the B3LYP level of theory for the secondary amine hydroxylation of chloramphenicol by P450 (Cpd I) by OAR mechanism.**

|                                  | UB3LYP/BS1   |       | UB3LYP/BS1+ZPE |       | UB3LYP/BS2//BS1 |       | UB3LYP/BS2//BS1+ZPE |       | UB3LYP/BS2//BS1 +Bulk Polarity |       | UB3LYP/BS2//BS1+ZPE+Bulk Polarity |       |
|----------------------------------|--------------|-------|----------------|-------|-----------------|-------|---------------------|-------|--------------------------------|-------|-----------------------------------|-------|
|                                  | AE           | RE    | AE             | RE    | AE              | RE    | AE                  | RE    | AE                             | RE    | AE                                | RE    |
| <sup>2</sup> TS <sub>O</sub>     | -3417.531146 | 0.00  | -3417.005725   | 0.00  | -3418.7547579   | 0.00  | -3418.2293369       | 0.00  | -3418.77871030                 | 0.00  | -3418.25328930                    | 0.00  |
| <sup>4</sup> TS <sub>O</sub>     | -3417.528216 | 1.84  | -3417.003287   | 1.53  | -3418.7523214   | 1.53  | -3418.2273924       | 1.22  | -3418.77674390                 | 1.23  | -3418.25181490                    | 0.93  |
| <sup>2</sup> INT <sub>O</sub>    | -3417.475698 | 34.79 | -3416.950785   | 34.48 | -3418.697986    | 35.62 | -3418.175622        | 33.71 | -3418.721278                   | 36.04 | -3418.198914                      | 34.12 |
| <sup>4</sup> INT <sub>O</sub>    | -3417.445694 | 53.62 | -3416.923842   | 51.38 | -3418.675834    | 49.53 | -3418.154374        | 47.04 | -3418.69931                    | 49.82 | -3418.17785                       | 47.34 |
| <sup>2</sup> TS-reb <sub>O</sub> | -3417.48701  | 27.70 | -3416.960535   | 28.36 | -3418.72179     | 20.69 | -3418.197787        | 19.80 | -3418.745983                   | 20.54 | -3418.23198                       | 13.37 |
| <sup>4</sup> TS-reb <sub>O</sub> | -3417.478229 | 33.21 | -3416.953291   | 32.90 | -3418.695224    | 37.36 | -3418.174341        | 34.51 | -3418.722436                   | 35.31 | -3418.201553                      | 32.46 |

**Table S3. Relative energy (RE) (in kcal/mol) and atomic energy (in a.u.) at the B3LYP level of theory for C-H hydroxylation of chloramphenicol by P450 (Cpd I) through dichloromethane oxidation (Path B).**

|                                  | UB3LYP/BS1   |        | UB3LYP/BS1+ZPE |        | UB3LYP/BS2//BS1 |        | UB3LYP/BS2//BS1+ZPE |        | UB3LYP/BS2//BS1+Bulk Polarity |        | UB3LYP/BS2//BS1+ZPE+ Bulk Polarity |        |
|----------------------------------|--------------|--------|----------------|--------|-----------------|--------|---------------------|--------|-------------------------------|--------|------------------------------------|--------|
|                                  | AE           | RE     | AE             | RE     | AE              | RE     | AE                  | RE     | AE                            | RE     | AE                                 | RE     |
| <sup>2</sup> RC <sub>1</sub>     | -3417.506344 | 0.00   | -3416.982004   | 0.00   | -3418.733393    | 0.00   | -3418.209053        | 0.00   | -3418.760815                  | 0.00   | -3418.236475                       | 0.00   |
| <sup>4</sup> RC <sub>1</sub>     | -3417.506306 | 0.02   | -3416.981916   | 0.06   | -3418.733215    | 0.11   | -3418.208825        | 0.14   | -3418.760691                  | 0.08   | -3418.236301                       | 0.11   |
| <sup>2</sup> TS-H <sub>1</sub>   | -3417.472789 | 21.06  | -3416.955000   | 16.95  | -3418.705472    | 17.52  | -3418.187683        | 13.41  | -3418.730882                  | 18.78  | -3418.213093                       | 14.67  |
| <sup>4</sup> TS-H <sub>1</sub>   | -3417.472181 | 21.44  | -3416.953881   | 17.65  | -3418.705771    | 17.33  | -3418.187471        | 13.54  | -3418.730774                  | 18.85  | -3418.212474                       | 15.06  |
| <sup>2</sup> INT <sub>1</sub>    | -3417.513620 | -4.57  | -3416.990816   | -5.53  | -3418.751320    | -11.25 | -3418.228516        | -12.21 | -3418.773686                  | -8.08  | -3418.250882                       | -9.04  |
| <sup>4</sup> INT <sub>1</sub>    | -3417.511647 | -3.33  | -3416.987909   | -3.71  | -3418.751647    | -11.45 | -3418.227909        | -11.83 | -3418.779116                  | -11.48 | -3418.255378                       | -11.86 |
| <sup>2</sup> TS-reb <sub>1</sub> | -3417.482987 | 14.63  | -3416.960999   | 13.13  | -3418.719534    | 8.58   | -3418.197546        | 7.08   | -3418.744938                  | 9.89   | -3418.222950                       | 8.38   |
| <sup>4</sup> TS-reb <sub>1</sub> | -3417.480536 | 16.20  | -3416.958324   | 14.86  | -3418.725861    | 4.73   | -3418.203649        | 3.39   | -3418.749993                  | 6.79   | -3418.227781                       | 5.46   |
| <sup>2</sup> P-OH <sub>1</sub>   | -3417.567042 | -38.09 | -3417.041801   | -37.52 | -3418.816109    | -51.91 | -3418.290868        | -51.34 | -3418.844834                  | -52.72 | -3418.319593                       | -52.16 |
| <sup>4</sup> P-OH <sub>1</sub>   | -3417.553096 | -29.34 | -3417.029579   | -29.85 | -3418.803125    | -43.76 | -3418.279608        | -44.27 | -3418.832515                  | -44.99 | -3418.308998                       | -45.51 |

**Table S4. Relative energy (RE) (in kcal/mol) and atomic energy (in a.u.) at the B3LYP level of theory for C-H hydroxylation of chloramphenicol by P450 (Cpd I) through Path C**

|                                  | UB3LYP/BS1   |        | UB3LYP/BS1+ZPE |        | UB3LYP/BS2//BS1 |        | UB3LYP/BS2//BS1+ZPE |        | UB3LYP/BS2//BS1+Bulk Polarity |        | UB3LYP/BS2//BS1+ZPE+ Bulk Polarity |        |
|----------------------------------|--------------|--------|----------------|--------|-----------------|--------|---------------------|--------|-------------------------------|--------|------------------------------------|--------|
|                                  | AE           | RE     | AE             | RE     | AE              | RE     | AE                  | RE     | AE                            | RE     | AE                                 | RE     |
| <sup>2</sup> RC <sub>2</sub>     | -3417.518405 | 0.00   | -3416.994121   | 0.00   | -3418.744103    | 0.00   | -3418.219819        | 0.00   | -3418.766443                  | 0.00   | -3418.242159                       | 0.00   |
| <sup>4</sup> RC <sub>2</sub>     | -3417.520272 | -1.17  | -3416.993467   | 0.41   | -3418.746027    | -1.21  | -3418.219222        | 0.37   | -3418.768272                  | -1.15  | -3418.241467                       | 0.43   |
| <sup>2</sup> TS-H <sub>2</sub>   | -3417.477291 | 25.80  | -3416.954502   | 24.86  | -3418.701457    | 26.76  | -3418.178668        | 25.82  | -3418.726320                  | 25.18  | -3418.203531                       | 24.24  |
| <sup>4</sup> TS-H <sub>2</sub>   | -3417.475889 | 26.68  | -3416.957589   | 22.92  | -3418.701189    | 26.93  | -3418.182889        | 23.17  | -3418.717889                  | 30.47  | -3418.199589                       | 26.71  |
| <sup>2</sup> INT <sub>2</sub>    | -3417.516126 | 1.43   | -3416.993322   | 0.50   | -3418.746199    | -1.32  | -3418.223395        | -2.24  | -3418.769017                  | -1.62  | -3418.246213                       | -2.54  |
| <sup>4</sup> INT <sub>2</sub>    | -3417.516120 | 1.43   | -3416.992333   | 1.12   | -3418.746195    | -1.31  | -3418.222408        | -1.62  | -3418.769018                  | -1.62  | -3418.245231                       | -1.93  |
| <sup>2</sup> TS-reb <sub>2</sub> | -3417.495214 | 15.72  | -3416.968226   | 15.84  | -3418.721717    | 15.25  | -3418.194729        | 15.37  | -3418.740273                  | 17.57  | -3418.213285                       | 17.68  |
| <sup>4</sup> TS-reb <sub>2</sub> | -3417.490681 | 17.40  | -3416.968469   | 16.10  | -3418.713418    | 19.25  | -3418.191206        | 17.95  | -3418.738121                  | 17.77  | -3418.215909                       | 16.47  |
| <sup>2</sup> P-OH <sub>2</sub>   | -3417.588235 | -43.82 | -3417.059416   | -40.97 | -3418.817932    | -46.33 | -3418.289113        | -43.48 | -3418.841224                  | -46.93 | -3418.312405                       | -44.08 |
| <sup>4</sup> P-OH <sub>2</sub>   | -3417.579096 | -38.08 | -3417.055579   | -38.56 | -3418.808010    | -40.10 | -3418.284493        | -40.58 | -3418.829096                  | -39.32 | -3418.305579                       | -39.80 |

**Table S5. Relative energy (RE) (in kcal/mol) and atomic energy (in a.u.) at the B3LYP level of theory for C-H hydroxylation of chloramphenicol by P450 (Cpd I) through Path D**

|                                  | UB3LYP/BS1   |        | UB3LYP/BS1+ZPE |        | UB3LYP/BS2//BS1 |        | UB3LYP/BS2//BS1+ZPE |        | UB3LYP/BS2//BS1+Bulk Polarity |        | UB3LYP/BS2//BS1+ZPE+ Bulk Polarity |        |
|----------------------------------|--------------|--------|----------------|--------|-----------------|--------|---------------------|--------|-------------------------------|--------|------------------------------------|--------|
|                                  | AE           | RE     | AE             | RE     | AE              | RE     | AE                  | RE     | AE                            | RE     | AE                                 | RE     |
| <sup>2</sup> RC <sub>3</sub>     | -3417.510151 | 0.00   | -3416.986161   | 0.00   | -3418.769545    | 0.00   | -3418.245555        | 0.00   | -3418.775611                  | 0.00   | -3418.251621                       | 0.00   |
| <sup>4</sup> RC <sub>3</sub>     | -3417.509939 | 0.13   | -3416.985983   | 0.11   | -3418.769423    | 0.08   | -3418.245467        | 0.06   | -3418.775054                  | 0.35   | -3418.251098                       | 0.33   |
| <sup>2</sup> TS-H <sub>3</sub>   | -3417.485291 | 15.60  | -3416.961612   | 15.41  | -3418.744625    | 15.64  | -3418.220946        | 15.44  | -3418.754142                  | 13.47  | -3418.230463                       | 13.28  |
| <sup>4</sup> TS- H <sub>3</sub>  | -3417.480889 | 18.36  | -3416.958059   | 17.63  | -3418.740889    | 17.98  | -3418.218059        | 17.25  | -3418.751424                  | 15.18  | -3418.228594                       | 14.45  |
| <sup>2</sup> INT <sub>3</sub>    | -3417.520481 | -6.48  | -3416.997544   | -7.14  | -3418.782556    | -8.16  | -3418.259619        | -8.83  | -3418.789462                  | -8.69  | -3418.266525                       | -9.35  |
| <sup>4</sup> INT <sub>3</sub>    | -3417.520476 | -6.48  | -3416.997535   | -7.14  | -3418.781476    | -7.49  | -3418.258535        | -8.14  | -3418.788237                  | -7.92  | -3418.265296                       | -8.58  |
| <sup>2</sup> TS-reb <sub>3</sub> | -3417.514139 | -2.64  | -3416.992108   | -3.84  | -3418.774265    | -3.04  | -3418.252234        | -4.25  | -3418.781151                  | -3.83  | -3418.259120                       | -5.03  |
| <sup>4</sup> TS-reb <sub>3</sub> | -3417.507851 | 1.44   | -3416.985823   | 0.21   | -3418.770142    | -0.37  | -3418.248114        | -1.61  | -3418.775654                  | -0.03  | -3418.253626                       | -1.26  |
| <sup>2</sup> P-OH <sub>3</sub>   | -3417.580354 | -44.05 | -3417.054883   | -43.12 | -3418.845012    | -47.36 | -3418.319541        | -46.43 | -3418.852637                  | -48.33 | -3418.327166                       | -47.40 |
| <sup>4</sup> P-OH <sub>3</sub>   | -3417.565701 | -34.86 | -3417.041026   | -34.43 | -3418.840126    | -44.29 | -3418.315451        | -43.86 | -3418.847125                  | -44.88 | -3418.322450                       | -44.45 |

**Table S6. Relative energy (RE) (in kcal/mol) and atomic energy (in a.u.) at the B3LYP level of theory for C-H hydroxylation of chloramphenicol by P450 (Cpd I) through Path E**

|                                  | UB3LYP/BS1   |        | UB3LYP/BS1+ZPE |        | UB3LYP/BS2//BS1 |        | UB3LYP/BS2//BS1+ZPE |        | UB3LYP/BS2//BS1+Bulk Polarity |        | UB3LYP/BS2//BS1+ZPE+ Bulk Polarity |        |
|----------------------------------|--------------|--------|----------------|--------|-----------------|--------|---------------------|--------|-------------------------------|--------|------------------------------------|--------|
|                                  | AE           | RE     | AE             | RE     | AE              | RE     | AE                  | RE     | AE                            | RE     | AE                                 | RE     |
| <sup>2</sup> RC <sub>4</sub>     | -3417.511360 | 0.00   | -3416.987420   | 0.00   | -3418.744103    | 0.00   | -3418.220163        | 0.00   | -3418.770141                  | 0.00   | -3418.246201                       | 0.00   |
| <sup>4</sup> RC <sub>4</sub>     | -3417.510643 | 0.45   | -3416.986883   | 0.34   | -3418.743468    | 0.40   | -3418.219708        | 0.29   | -3418.769406                  | 0.46   | -3418.245646                       | 0.35   |
| <sup>2</sup> TS-H <sub>4</sub>   | -3417.483235 | 17.65  | -3416.945656   | 26.21  | -3418.700199    | 27.55  | -3418.182620        | 23.56  | -3418.725654                  | 27.92  | -3418.208075                       | 23.92  |
| <sup>4</sup> TS- H <sub>4</sub>  | -3417.466339 | 28.25  | -3416.948843   | 24.21  | -3418.695587    | 30.44  | -3418.178091        | 26.40  | -3418.723452                  | 29.30  | -3418.205956                       | 25.25  |
| <sup>2</sup> INT <sub>4</sub>    | -3417.499623 | 7.37   | -3416.976586   | 6.80   | -3418.735919    | 5.14   | -3418.212882        | 4.57   | -3418.764068                  | 3.81   | -3418.240031                       | 3.87   |
| <sup>4</sup> INT <sub>4</sub>    | -3417.497662 | 8.60   | -3416.976675   | 6.74   | -3418.734758    | 5.86   | -3418.213771        | 4.01   | -3418.761435                  | 5.46   | -3418.240448                       | 3.61   |
| <sup>2</sup> TS-reb <sub>4</sub> | -3417.504139 | 4.08   | -3416.977008   | 6.20   | -3418.737259    | 3.90   | -3418.210128        | 6.01   | -3418.762365                  | 4.42   | -3418.235234                       | 6.53   |
| <sup>4</sup> TS-reb <sub>4</sub> | -3417.496108 | 9.57   | -3416.975857   | 7.26   | -3418.734400    | 6.09   | -3418.214149        | 3.77   | -3418.759356                  | 6.77   | -3418.239105                       | 4.45   |
| <sup>2</sup> P-OH <sub>4</sub>   | -3417.584322 | -45.78 | -3417.057161   | -43.76 | -3418.828705    | -53.09 | -3418.301544        | -51.07 | -3418.853076                  | -52.04 | -3418.325915                       | -50.02 |
| <sup>4</sup> P-OH <sub>4</sub>   | -3417.572130 | -38.13 | -3417.046476   | -37.06 | -3418.808541    | -40.44 | -3418.282887        | -39.36 | -3418.838246                  | -42.74 | -3418.312592                       | -41.66 |

Table S7. UB3LYP/BS1-calculated Mulliken group spin densities and group charges for the species in the N-hydroxylation of CP by the P450 mechanism through the HAT pathway.

|                                  | Spin densities |      |       |       |       | Charge |       |       |       |       |
|----------------------------------|----------------|------|-------|-------|-------|--------|-------|-------|-------|-------|
|                                  | Fe             | O    | Por   | CP    | SH    | Fe     | O     | Por   | CP    | SH    |
| <sup>2</sup> RC <sub>H</sub>     | 1.40           | 0.73 | -0.62 | 0.01  | -0.51 | 0.53   | -0.5  | 0.04  | -0.06 | -0.01 |
| <sup>4</sup> RC <sub>H</sub>     | 1.23           | 0.79 | 0.51  | 0.01  | 0.45  | 0.52   | -0.49 | 0.03  | -0.05 | -0.02 |
| <sup>2</sup> TS <sub>H</sub>     | 1.76           | 0.42 | -0.78 | -0.28 | -0.13 | 0.48   | -0.62 | 0.22  | -0.07 | 0     |
| <sup>4</sup> TS <sub>H</sub>     | 1.69           | 0.44 | 0.31  | 0.29  | 0.28  | 0.44   | -0.61 | 0.2   | 0.04  | -0.06 |
| <sup>2</sup> INT <sub>H</sub>    | 1.13           | 0.01 | -0.34 | 1     | -0.8  | 0.93   | -0.75 | -0.61 | 0.42  | 0.01  |
| <sup>4</sup> INT <sub>H</sub>    | 2.64           | 0.18 | 0.19  | -0.84 | 0.83  | 0.79   | -0.72 | -0.26 | 0.27  | -0.08 |
| <sup>2</sup> TS-reb <sub>H</sub> | 1.23           | 0.06 | -0.58 | 0.41  | -0.12 | 0.32   | -0.56 | -0.06 | 0.25  | 0.04  |
| <sup>4</sup> TS-reb <sub>H</sub> | 2.15           | 0.05 | 0.00  | 0.51  | 0.30  | 0.42   | -0.57 | -0.2  | 0.3   | 0.06  |
| <sup>2</sup> P-OH                | 1.29           | 0.00 | -0.15 | 0.00  | -0.14 | 0.34   | -0.45 | -0.4  | 0.48  | 0.04  |
| <sup>4</sup> P-OH                | 2.48           | 0.00 | 0.04  | 0.00  | 0.48  | 0.54   | -0.46 | -0.42 | 0.48  | -0.14 |

Table S8. UB3LYP/BS1-calculated Mulliken group spin densities and group charges for the species in the N-hydroxylation of CP by the P450 mechanism through the OAR pathway.

|                                  | Spin densities |      |       |      |       | Charge |       |       |      |       |
|----------------------------------|----------------|------|-------|------|-------|--------|-------|-------|------|-------|
|                                  | Fe             | O    | Por   | CP   | SH    | Fe     | O     | Por   | CP   | SH    |
| <sup>2</sup> TS <sub>O</sub>     | 1.14           | 0.14 | -0.22 | 0.01 | -0.06 | 0.36   | -0.41 | -0.30 | 0.33 | 0.02  |
| <sup>4</sup> TS <sub>O</sub>     | 2.97           | 0.31 | -0.28 | 0.09 | -0.09 | 0.50   | -0.41 | -0.30 | 0.29 | -0.09 |
| <sup>2</sup> INT <sub>O</sub>    | 1.08           | 0.00 | -0.09 | 0.01 | 0.00  | 0.32   | -0.40 | -0.50 | 0.56 | 0.03  |
| <sup>4</sup> INT <sub>O</sub>    | 2.56           | 0.03 | -0.02 | 0.00 | 0.44  | 0.53   | -0.39 | -0.48 | 0.51 | -0.17 |
| <sup>2</sup> TS-reb <sub>O</sub> | 1.22           | 0.00 | -0.13 | 0.00 | -0.10 | 0.29   | -0.44 | -0.40 | 0.47 | 0.07  |
| <sup>4</sup> TS-reb <sub>O</sub> | 3.06           | 0.00 | -0.01 | 0.00 | -0.05 | 0.55   | -0.43 | -0.54 | 0.45 | -0.03 |

Table S9. UB3LYP/BS1-calculated Mulliken group spin densities and group charges for the species in dichloromethylene oxidation of CP by the P450(Path B).

|                                  | Spin densities |      |       |       |       | Charge |       |       |       |       |
|----------------------------------|----------------|------|-------|-------|-------|--------|-------|-------|-------|-------|
|                                  | Fe             | O    | Por   | CP    | SH    | Fe     | O     | Por   | CP    | SH    |
| <sup>2</sup> RC <sub>1</sub>     | 1.24           | 0.86 | -0.56 | 0.00  | -0.54 | 0.52   | -0.38 | -0.07 | -0.01 | -0.06 |
| <sup>4</sup> RC <sub>1</sub>     | 1.11           | 0.92 | 0.48  | 0.00  | 0.49  | 0.51   | -0.38 | -0.06 | -0.01 | -0.06 |
| <sup>2</sup> TS-H <sub>1</sub>   | 1.94           | 0.23 | -0.40 | -0.46 | -0.32 | 0.51   | -0.61 | -0.1  | 0.17  | 0.02  |
| <sup>4</sup> TS-H <sub>1</sub>   | 1.25           | 0.55 | 0.31  | 0.52  | 0.37  | 0.46   | -0.58 | -0.1  | 0.17  | 0.05  |
| <sup>2</sup> INT <sub>1</sub>    | 0.82           | 0.19 | 0.41  | -0.96 | 0.55  | 0.54   | -0.63 | -0.23 | 0.39  | -0.07 |
| <sup>4</sup> INT <sub>1</sub>    | 1.84           | 0.26 | -0.13 | 1.00  | 0.02  | 0.48   | -0.66 | -0.28 | 0.42  | 0.05  |
| <sup>2</sup> TS-reb <sub>1</sub> | 0.91           | 0.14 | 0.46  | -0.80 | 0.29  | 0.42   | -0.6  | -0.16 | 0.35  | -0.01 |
| <sup>4</sup> TS-reb <sub>1</sub> | 2.14           | 0.03 | -0.10 | 0.76  | 0.18  | 0.5    | -0.59 | -0.29 | 0.38  | 0.01  |
| <sup>2</sup> P-OH <sub>1</sub>   | 1.30           | 0.00 | -0.15 | 0.00  | -0.14 | 0.35   | -0.51 | -0.38 | 0.51  | 0.02  |
| <sup>4</sup> P-OH <sub>1</sub>   | 2.96           | 0.00 | 0.03  | 0.00  | 0.01  | 0.57   | -0.51 | -0.49 | 0.49  | -0.07 |

Table S10. UB3LYP/BS1-calculated Mulliken group spin densities and group charges for the species in C-H hydroxylation of CP by the P450 (Path C).

|                                  | Spin densities |      |       |       |       | Charge |       |       |      |       |
|----------------------------------|----------------|------|-------|-------|-------|--------|-------|-------|------|-------|
|                                  | Fe             | O    | Por   | CP    | SH    | Fe     | O     | Por   | CP   | SH    |
| <sup>2</sup> RC <sub>2</sub>     | 1.24           | 0.86 | -0.53 | 0.00  | -0.57 | 0.50   | -0.38 | -0.09 | 0.00 | -0.04 |
| <sup>4</sup> RC <sub>2</sub>     | 1.10           | 0.93 | 0.45  | 0.00  | 0.52  | 0.49   | -0.37 | -0.63 | 0.55 | -0.04 |
| <sup>2</sup> TS-H <sub>2</sub>   | 1.06           | 0.46 | -0.62 | 0.54  | -0.44 | 0.46   | -0.58 | -0.12 | 0.26 | -0.02 |
| <sup>4</sup> TS-H <sub>2</sub>   | 0.92           | 0.72 | 0.35  | 0.59  | 0.42  | 0.42   | -0.54 | -0.13 | 0.23 | 0.03  |
| <sup>2</sup> INT <sub>2</sub>    | 0.84           | 0.19 | 0.42  | -1    | 0.54  | 0.49   | -0.61 | -0.24 | 0.39 | -0.04 |
| <sup>4</sup> INT <sub>2</sub>    | 1.79           | 0.29 | -0.12 | 1.0   | 0.03  | 0.44   | -0.62 | -0.31 | 0.44 | 0.05  |
| <sup>2</sup> TS-reb <sub>2</sub> | 0.92           | 0.16 | 0.43  | -0.77 | 0.26  | 0.44   | -0.58 | -0.17 | 0.33 | -0.01 |
| <sup>4</sup> TS-reb <sub>2</sub> | 2.23           | 0.04 | -0.13 | 0.73  | 0.14  | 0.51   | -0.56 | -0.31 | 0.35 | 0.01  |
| <sup>2</sup> P-OH <sub>2</sub>   | 1.25           | 0    | -0.13 | 0     | -0.12 | 0.37   | -0.54 | -0.37 | 0.51 | 0.03  |
| <sup>4</sup> P-OH <sub>2</sub>   | 3.07           | 0.00 | 0.01  | 0.00  | -0.09 | 0.54   | -0.60 | -0.59 | 0.67 | -0.03 |

Table S11. UB3LYP/BS1-calculated Mulliken group spin densities and group charges for the species in  $\beta$ -Hydroxymethylene oxidation of CP by the P450 (Path D).

|                                  | Spin densities |       |       |       |       | Charge |       |       |       |       |
|----------------------------------|----------------|-------|-------|-------|-------|--------|-------|-------|-------|-------|
|                                  | Fe             | O     | Por   | CP    | SH    | Fe     | O     | Por   | CP    | SH    |
| <sup>2</sup> RC <sub>3</sub>     | 1.32           | 0.79  | -0.56 | 0.00  | -0.56 | 0.51   | -0.43 | -0.04 | -0.03 | -0.01 |
| <sup>4</sup> RC <sub>3</sub>     | 1.18           | 0.84  | 0.47  | 0.01  | 0.50  | 0.50   | -0.43 | -0.03 | -0.03 | -0.02 |
| <sup>2</sup> TS-H <sub>3</sub>   | 1.91           | 0.24  | -0.48 | -0.41 | -0.26 | 0.51   | -0.62 | -0.1  | 0.15  | 0.05  |
| <sup>4</sup> TS-H <sub>3</sub>   | 1.23           | 0.53  | 0.34  | 0.51  | 0.39  | 0.48   | -0.59 | -0.1  | 0.16  | 0.05  |
| <sup>2</sup> INT <sub>3</sub>    | 1.95           | 0.20  | -0.13 | -0.99 | -0.03 | 0.49   | -0.69 | -0.25 | 0.37  | 0.08  |
| <sup>4</sup> INT <sub>3</sub>    | 1.95           | 0.20  | -0.13 | 1.00  | -0.03 | 0.49   | -0.69 | -0.25 | 0.37  | 0.08  |
| <sup>2</sup> TS-reb <sub>3</sub> | 1.12           | -0.07 | -0.55 | 0.63  | -0.13 | 0.37   | -0.70 | -0.22 | 0.58  | -0.03 |
| <sup>4</sup> TS-reb <sub>3</sub> | 2.36           | 0.00  | -0.12 | 0.69  | 0.07  | 0.49   | -0.68 | -0.33 | 0.53  | -0.01 |
| <sup>2</sup> P-OH <sub>3</sub>   | 1.30           | 0.00  | -0.15 | 0.00  | -0.14 | 0.35   | -0.63 | -0.39 | 0.65  | 0.02  |
| <sup>4</sup> P-OH <sub>3</sub>   | 3.14           | 0.00  | -0.05 | 0.00  | -0.09 | 0.57   | -0.64 | -0.50 | 0.64  | -0.07 |

Table S12. UB3LYP/BS1-calculated Mulliken group spin densities and group charges for the species in  $\alpha$ -Hydroxymethylene oxidation of CP by the P450 (Path E).

|                                  | Spin densities |      |       |       |       | Charge |       |       |       |       |
|----------------------------------|----------------|------|-------|-------|-------|--------|-------|-------|-------|-------|
|                                  | Fe             | O    | Por   | CP    | SH    | Fe     | O     | Por   | CP    | SH    |
| <sup>2</sup> RC <sub>4</sub>     | 1.30           | 0.81 | -0.56 | 0.00  | -0.55 | 0.53   | -0.43 | -0.03 | -0.04 | -0.03 |
| <sup>4</sup> RC <sub>4</sub>     | 1.17           | 0.85 | 0.47  | 0.01  | 0.50  | 0.51   | -0.42 | -0.03 | -0.03 | -0.03 |
| <sup>2</sup> TS-H <sub>4</sub>   | 1.9            | 0.26 | -0.46 | -0.44 | -0.26 | 0.42   | -0.45 | -0.29 | 0.26  | 0.06  |
| <sup>4</sup> TS-H <sub>4</sub>   | 1.25           | 0.66 | 0.15  | 0.55  | 0.39  | 0.44   | -0.51 | -0.26 | 0.29  | 0.04  |
| <sup>2</sup> INT <sub>4</sub>    | 1.88           | 0.16 | -0.15 | -0.90 | 0.02  | 0.38   | -0.58 | -0.30 | 0.41  | 0.07  |
| <sup>4</sup> INT <sub>4</sub>    | 0.92           | 0.12 | 0.63  | 1.00  | 0.34  | 0.45   | -0.71 | -0.03 | 0.32  | -0.02 |
| <sup>2</sup> TS-reb <sub>4</sub> | 0.95           | 0.12 | 0.43  | -0.75 | 0.25  | 0.44   | -0.62 | -0.18 | 0.37  | -0.01 |
| <sup>4</sup> TS-reb <sub>4</sub> | 2.26           | 0.04 | -0.13 | 0.80  | 0.04  | 0.48   | -0.67 | -0.30 | 0.48  | 0.02  |
| <sup>2</sup> P-OH <sub>4</sub>   | 1.10           | 0.00 | -0.09 | 0.00  | -0.01 | 0.37   | -0.62 | -0.54 | 0.75  | 0.04  |
| <sup>4</sup> P-OH <sub>4</sub>   | 3.14           | 0.00 | -0.04 | 0.00  | -0.10 | 0.56   | -0.60 | -0.51 | 0.59  | -0.04 |

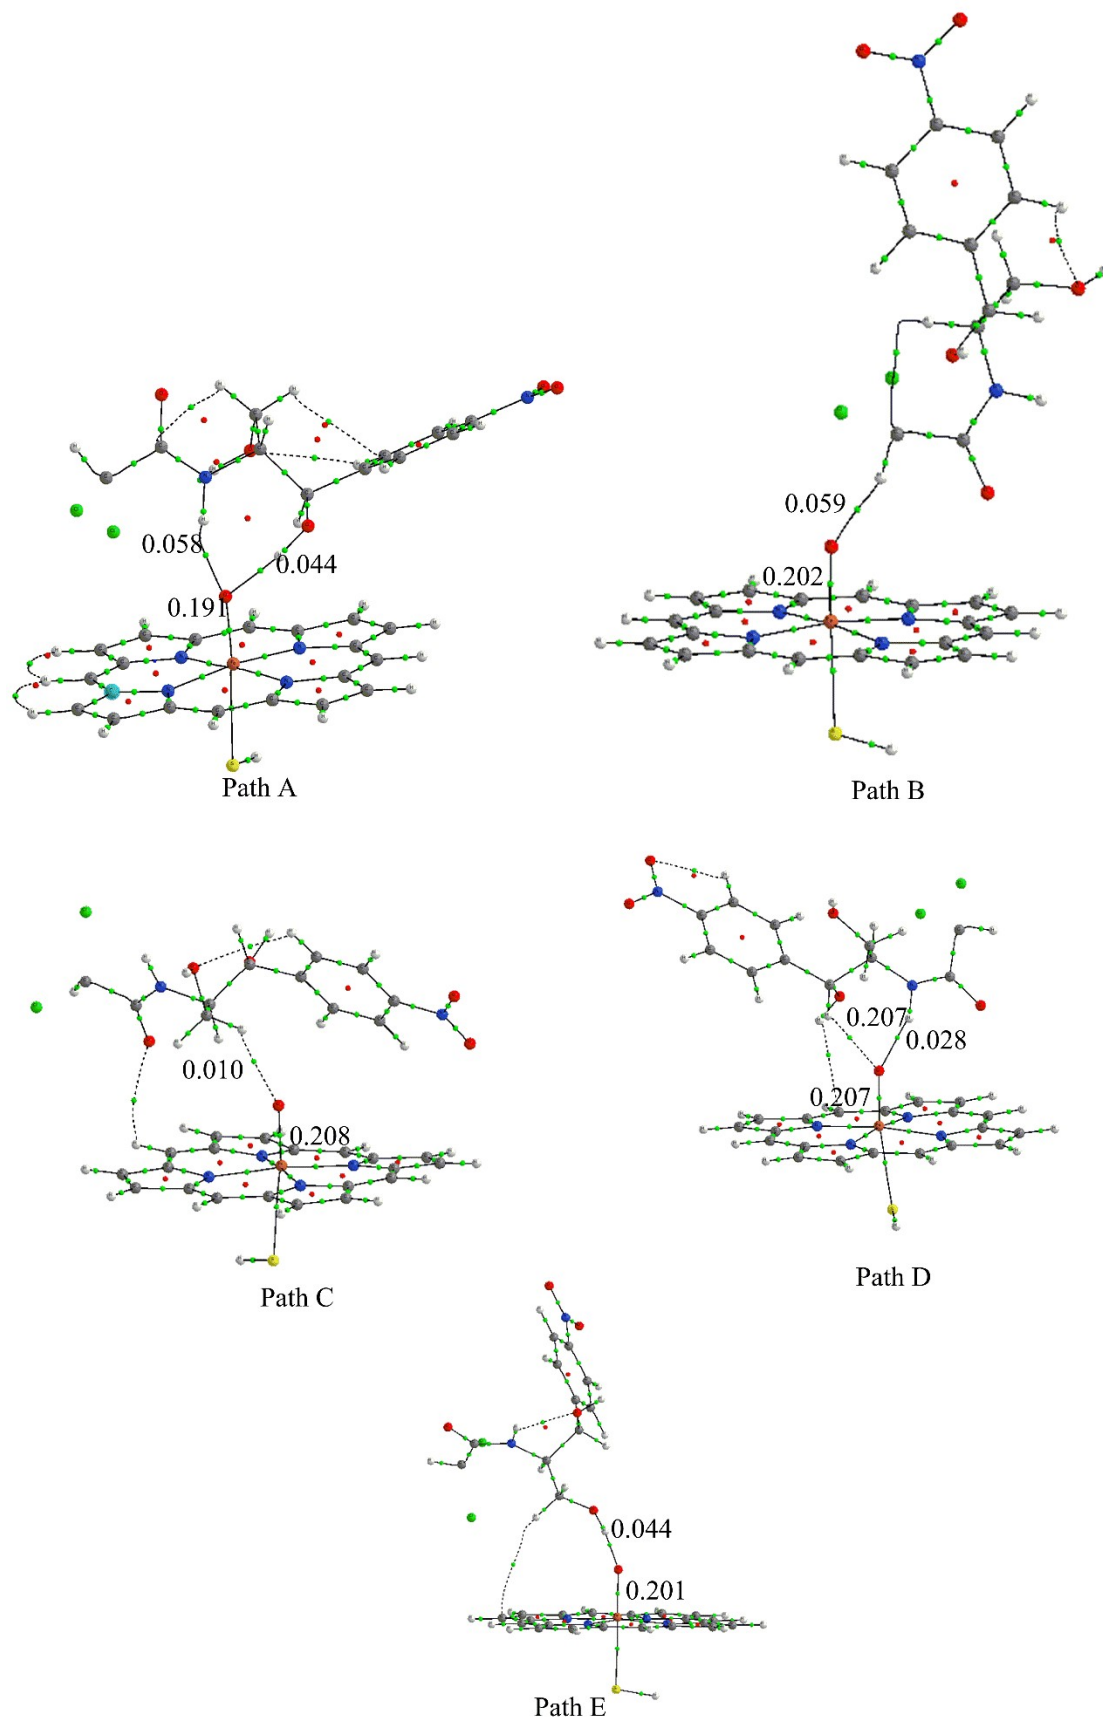

Figure S1. Molecular representation of the electronic density of some BCPs (in a.u.) of the intermediates of Paths A-E. 8



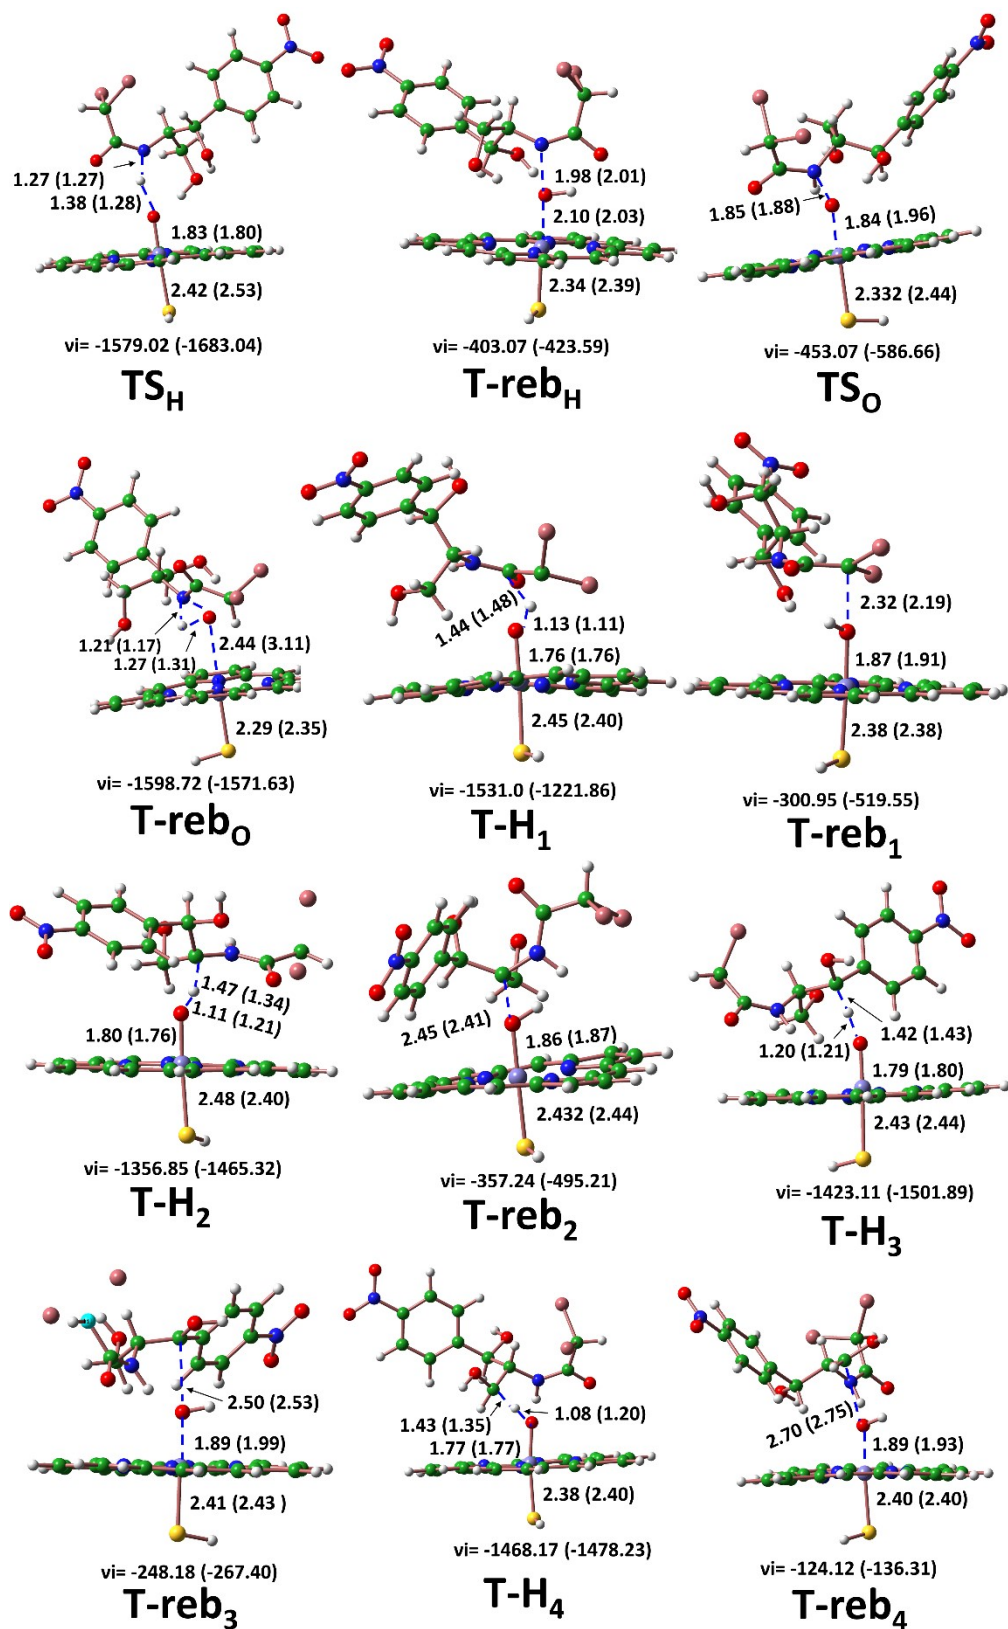

Figure S2. Structures of transition states in all pathways in this study. Cartesian coordinates of all structures discussed in this study.

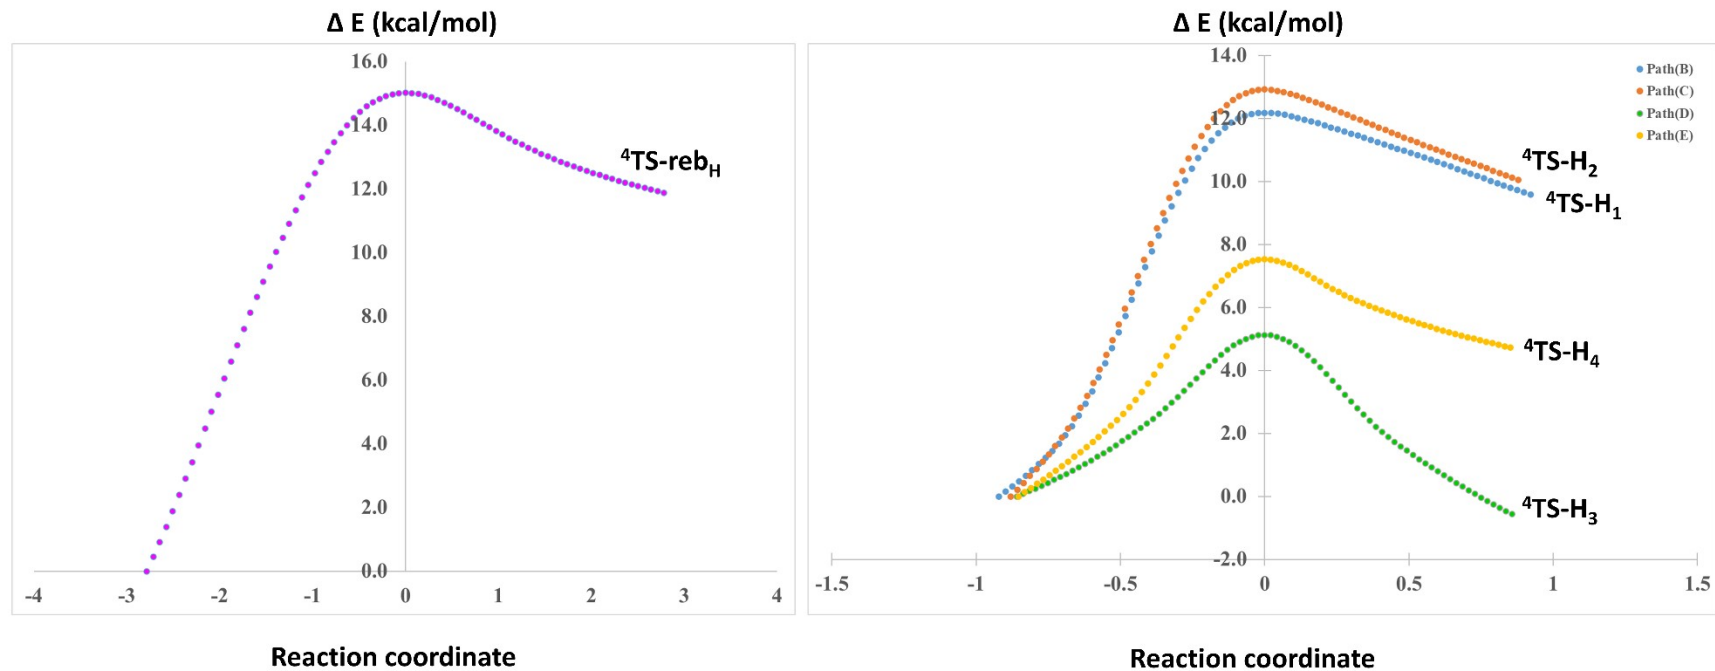

Figure S3. Computed intrinsic reaction coordinate (IRC) of the rate-determining step transition states in paths A (left) and B, C, D, and E (right).

**HAT pathway****<sup>4</sup>RC<sub>H</sub>**

|    |             |             |             |
|----|-------------|-------------|-------------|
| Fe | 1.73681000  | -1.22140000 | 0.21357800  |
| O  | 0.90661000  | 0.13520000  | -0.28150200 |
| S  | 2.85596900  | -3.27608700 | 1.15608800  |
| H  | 2.10463200  | -4.23471500 | 0.50264500  |
| N  | 1.29337700  | -2.24432200 | -1.46953000 |
| C  | 0.15803300  | -3.46090400 | -3.08562300 |
| C  | 1.29805900  | -2.98451400 | -3.66862800 |
| H  | -0.61926400 | -4.06629100 | -3.52765800 |
| H  | 1.64082000  | -3.12378900 | -4.68320300 |
| N  | 3.46869100  | -0.61050800 | -0.61541500 |
| C  | 3.88100700  | -0.81271500 | -1.92036900 |
| C  | 5.13780500  | -0.13530300 | -2.15420900 |
| C  | 5.48324800  | 0.47615800  | -0.98343800 |
| H  | 5.67052000  | -0.13720500 | -3.09356400 |
| H  | 6.35472100  | 1.07741700  | -0.77126500 |
| N  | 2.30750800  | -0.43398700 | 1.97653200  |
| C  | 3.44523600  | 0.32441900  | 2.22018000  |
| C  | 1.59643400  | -0.44374700 | 3.16596100  |
| C  | 3.44484400  | 0.78790100  | 3.58961400  |
| C  | 2.30341800  | 0.31735500  | 4.17166200  |
| H  | 4.22261000  | 1.39331900  | 4.03093400  |
| H  | 1.96004800  | 0.45872300  | 5.18571800  |
| N  | 0.14637600  | -2.06779300 | 1.12245000  |
| C  | -1.52371600 | -2.55136400 | 2.66375800  |
| H  | -2.05640300 | -2.55287800 | 3.60311900  |
| C  | -0.27611400 | -1.85946000 | 2.43258300  |
| C  | 0.15773300  | -2.99681800 | -1.71740400 |
| C  | 2.00144300  | -2.22232500 | -2.66232700 |
| C  | 4.43942100  | 0.17608500  | -0.02803900 |
| C  | 0.38959200  | -1.09443400 | 3.37352100  |
| H  | -0.06140900 | -1.00846400 | 4.35604000  |
| C  | -0.83370900 | -3.28163800 | -0.78643800 |
| H  | -1.67378800 | -3.88029600 | -1.12069200 |
| C  | 3.20393900  | -1.56430800 | -2.86907500 |
| H  | 3.64805600  | -1.63762600 | -3.85604000 |
| C  | 4.43259300  | 0.60697200  | 1.29230200  |
| H  | 5.26551300  | 1.21880800  | 1.62085300  |
| C  | -1.86742000 | -3.16749800 | 1.49534700  |
| H  | -2.73881500 | -3.77037900 | 1.28716200  |
| C  | -0.83588900 | -2.86107800 | 0.53093800  |
| C  | 1.49043400  | 4.10176900  | -1.01306900 |
| H  | 1.67567500  | 5.11636900  | -1.34725400 |
| C  | -1.91310000 | 2.42932000  | -0.38616700 |
| C  | -2.15562000 | 0.89439100  | -0.30207200 |

|                              |             |             |             |
|------------------------------|-------------|-------------|-------------|
| H                            | -2.37754900 | 2.79890700  | -1.30904000 |
| H                            | -1.69261200 | 0.53397900  | 0.62366400  |
| Cl                           | 2.34372600  | 3.93413600  | 0.65211700  |
| Cl                           | 2.29094300  | 2.97164100  | -2.26713200 |
| C                            | -0.01387500 | 3.88358900  | -0.90204800 |
| O                            | -0.74919200 | 4.85731100  | -1.20523800 |
| N                            | -0.46218300 | 2.68585800  | -0.48201700 |
| C                            | -2.52433500 | 3.20611500  | 0.78390900  |
| H                            | -3.61778600 | 3.18423500  | 0.71018600  |
| H                            | -2.19260900 | 4.24678900  | 0.72813200  |
| O                            | -2.09999400 | 2.57311400  | 2.03372700  |
| H                            | -2.00450600 | 3.23741900  | 2.74139600  |
| O                            | -1.55688200 | 0.24232000  | -1.44860400 |
| H                            | -0.59099800 | 0.11966300  | -1.27424000 |
| C                            | -3.63233400 | 0.54508500  | -0.28573200 |
| C                            | -4.36397000 | 0.58203900  | 0.91642600  |
| C                            | -4.27940100 | 0.16695100  | -1.47508200 |
| C                            | -5.71938000 | 0.25584000  | 0.93351200  |
| H                            | -3.86209100 | 0.87777500  | 1.83185500  |
| C                            | -5.63488200 | -0.16097400 | -1.47195500 |
| H                            | -3.69972000 | 0.11473700  | -2.38742600 |
| C                            | -6.33838600 | -0.11231000 | -0.26485900 |
| H                            | -6.29764400 | 0.27631800  | 1.84782900  |
| H                            | -6.15016100 | -0.45414300 | -2.37715000 |
| N                            | -7.75728300 | -0.46351700 | -0.25257300 |
| O                            | -8.30050200 | -0.80291700 | -1.34473900 |
| O                            | -8.37745500 | -0.41349800 | 0.85070000  |
| H                            | 0.18811600  | 1.92694700  | -0.26709900 |
| <sup>2</sup> RC <sub>H</sub> |             |             |             |
| Fe                           | 1.67871800  | -1.21713800 | 0.26988500  |
| O                            | 0.91055100  | 0.12772200  | -0.34590600 |
| S                            | 3.05573300  | -3.05921700 | 1.34072900  |
| H                            | 2.35874800  | -3.16788700 | 2.52947000  |
| N                            | 0.07277300  | -1.81300700 | 1.33793300  |
| C                            | -1.57116400 | -1.95567300 | 2.96915800  |
| C                            | -1.98486600 | -2.71865600 | 1.91356000  |
| H                            | -2.07451200 | -1.78103500 | 3.90845900  |
| H                            | -2.89527000 | -3.29101900 | 1.81621100  |
| N                            | 1.12307700  | -2.42835500 | -1.23601300 |
| C                            | -0.04804400 | -3.16317400 | -1.32525700 |
| C                            | -0.11642400 | -3.83325000 | -2.60381300 |
| C                            | 1.01874100  | -3.50323500 | -3.28800200 |
| H                            | -0.93146700 | -4.46643600 | -2.92118300 |
| H                            | 1.32010000  | -3.81385000 | -4.27733700 |
| N                            | 3.41752300  | -0.84446300 | -0.67659400 |
| C                            | 3.77486800  | -1.25501500 | -1.95383200 |

|    |             |             |             |
|----|-------------|-------------|-------------|
| C  | 4.44275800  | -0.01989900 | -0.24301400 |
| C  | 5.05244500  | -0.68244900 | -2.31748600 |
| C  | 5.46243500  | 0.08153400  | -1.26409200 |
| H  | 5.55339000  | -0.85142700 | -3.25912400 |
| H  | 6.36608500  | 0.66500700  | -1.16978300 |
| N  | 2.37496700  | -0.24137300 | 1.89903800  |
| C  | 3.62267400  | 1.15142200  | 3.27585600  |
| H  | 4.44115000  | 1.77874600  | 3.59629800  |
| C  | 3.54903500  | 0.49850000  | 1.98843000  |
| C  | -0.29085600 | -1.39181000 | 2.60700500  |
| C  | -0.96173800 | -2.62565900 | 0.89764000  |
| C  | 1.78793200  | -2.62878600 | -2.43175500 |
| C  | 4.50014300  | 0.61082300  | 0.99006100  |
| H  | 5.36273200  | 1.23653200  | 1.19038300  |
| C  | 0.46630900  | -0.56174100 | 3.42539800  |
| H  | 0.05385400  | -0.31080600 | 4.39665300  |
| C  | -1.01533300 | -3.25554300 | -0.33618700 |
| H  | -1.88849900 | -3.86279400 | -0.54788000 |
| C  | 3.02139000  | -2.08427200 | -2.76604700 |
| H  | 3.42455000  | -2.32741300 | -3.74314100 |
| C  | 2.48892600  | 0.82340900  | 3.96166100  |
| H  | 2.19558700  | 1.12801400  | 4.95544200  |
| C  | 1.70388500  | -0.03447300 | 3.10323700  |
| C  | 1.52168200  | 4.03853500  | -1.23881400 |
| H  | 1.71294800  | 5.03432500  | -1.62261000 |
| C  | -1.88365500 | 2.39594100  | -0.52002100 |
| C  | -2.12290200 | 0.86310200  | -0.40977000 |
| H  | -2.36259900 | 2.76027700  | -1.43711600 |
| H  | -1.64843600 | 0.51909200  | 0.51649300  |
| Cl | 2.36144300  | 3.95465800  | 0.44212200  |
| Cl | 2.32387800  | 2.84054900  | -2.42412600 |
| C  | 0.01665300  | 3.83080600  | -1.11478300 |
| O  | -0.71788900 | 4.79134600  | -1.44924400 |
| N  | -0.42860400 | 2.65024900  | -0.63356100 |
| C  | -2.45224000 | 3.18283100  | 0.67188200  |
| H  | -3.53750900 | 3.08871100  | 0.71016500  |
| H  | -2.19915700 | 4.24210300  | 0.56028100  |
| O  | -1.97407300 | 2.65812000  | 1.94867600  |
| H  | -1.01241300 | 2.82493200  | 2.02582600  |
| O  | -1.53787300 | 0.18559100  | -1.54900300 |
| H  | -0.57552200 | 0.04362700  | -1.36996800 |
| C  | -3.59807700 | 0.51445700  | -0.36110100 |
| C  | -4.29720700 | 0.53701200  | 0.86056900  |
| C  | -4.27629300 | 0.15325000  | -1.53811300 |
| C  | -5.65285700 | 0.21358500  | 0.90891500  |
| H  | -3.77234200 | 0.81429700  | 1.76898100  |

|                                   |             |             |             |
|-----------------------------------|-------------|-------------|-------------|
| C                                 | -5.63196400 | -0.17213900 | -1.50360200 |
| H                                 | -3.72125600 | 0.11030100  | -2.46633100 |
| C                                 | -6.30324000 | -0.13749400 | -0.27775300 |
| H                                 | -6.20685900 | 0.22418400  | 1.83826100  |
| H                                 | -6.17143700 | -0.45303600 | -2.39851500 |
| N                                 | -7.72212900 | -0.48801800 | -0.23292400 |
| O                                 | -8.29493300 | -0.80699600 | -1.31591900 |
| O                                 | -8.31113900 | -0.45845900 | 0.88772600  |
| H                                 | 0.22079600  | 1.87466300  | -0.46991800 |
| <b><sup>4</sup>TS<sub>H</sub></b> |             |             |             |
| Fe                                | 2.30966456  | -0.82693949 | 0.14062331  |
| O                                 | 0.99078156  | 0.30699251  | -0.42108369 |
| S                                 | 4.00212100  | -2.39198600 | 0.88456500  |
| H                                 | 5.06590500  | -1.89638500 | 0.15642200  |
| N                                 | 1.07663100  | -2.00807900 | 1.19623600  |
| C                                 | -0.26288700 | -2.80853400 | 2.90759500  |
| C                                 | -0.46939700 | -3.61411700 | 1.82291300  |
| H                                 | -0.71746200 | -2.86944500 | 3.88512000  |
| H                                 | -1.12627500 | -4.46694700 | 1.73677500  |
| N                                 | 2.01071900  | -2.04451500 | -1.49396100 |
| C                                 | 1.15043800  | -3.12970900 | -1.57124800 |
| C                                 | 1.18104700  | -3.68198900 | -2.90633900 |
| C                                 | 2.06810200  | -2.93756300 | -3.63022800 |
| H                                 | 0.59495200  | -4.52914000 | -3.23032800 |
| H                                 | 2.35476000  | -3.05476000 | -4.66481200 |
| N                                 | 3.76087500  | 0.11789500  | -0.90438000 |
| C                                 | 4.10234900  | -0.05408500 | -2.23942400 |
| C                                 | 4.49254100  | 1.20969900  | -0.45528700 |
| C                                 | 5.09421300  | 0.92499800  | -2.61777000 |
| C                                 | 5.33551600  | 1.70118400  | -1.51960400 |
| H                                 | 5.52883000  | 1.00415900  | -3.60325100 |
| H                                 | 6.00517600  | 2.54336700  | -1.42760300 |
| N                                 | 2.66200900  | 0.29785000  | 1.71810800  |
| C                                 | 3.49148300  | 1.93521700  | 3.13053600  |
| H                                 | 4.08293200  | 2.77747300  | 3.45745200  |
| C                                 | 3.55759500  | 1.35460300  | 1.81010200  |
| C                                 | 0.69798000  | -1.80417100 | 2.51639400  |
| C                                 | 0.35888400  | -3.11048600 | 0.75250400  |
| C                                 | 2.59409500  | -1.92250700 | -2.74602600 |
| C                                 | 4.40709900  | 1.78093300  | 0.80358800  |
| H                                 | 5.04295600  | 2.63379300  | 1.01108600  |
| C                                 | 1.14257100  | -0.77959000 | 3.33704900  |
| H                                 | 0.75097200  | -0.74177400 | 4.34713100  |
| C                                 | 0.38851000  | -3.63216700 | -0.53052900 |
| H                                 | -0.23778400 | -4.49268000 | -0.73625200 |
| C                                 | 3.56315400  | -0.99825100 | -3.09758100 |

|                                   |             |             |             |
|-----------------------------------|-------------|-------------|-------------|
| H                                 | 3.92804500  | -1.01534500 | -4.11827900 |
| C                                 | 2.56948200  | 1.21992700  | 3.84128100  |
| H                                 | 2.26044600  | 1.35667900  | 4.86712400  |
| C                                 | 2.06125500  | 0.18938600  | 2.96507700  |
| C                                 | -0.99411556 | 4.25258449  | -1.04748331 |
| H                                 | -0.35189556 | 5.05179349  | -1.39970231 |
| C                                 | -1.97391556 | 1.70218249  | 0.39388669  |
| C                                 | -1.98756056 | 0.16490849  | -0.09765831 |
| H                                 | -2.64240756 | 2.25594049  | -0.27256731 |
| Cl                                | -1.84903600 | 3.60188100  | -2.53806000 |
| Cl                                | -2.29593700 | 5.13720200  | 0.09883300  |
| C                                 | -0.13515256 | 3.22621549  | -0.30304731 |
| O                                 | 1.11091644  | 3.45397449  | -0.35773231 |
| N                                 | -0.61516656 | 2.17794149  | 0.41098769  |
| C                                 | -2.49353056 | 1.78550249  | 1.85720369  |
| H                                 | -3.51915056 | 1.42099649  | 1.91158769  |
| H                                 | -2.47055756 | 2.83363849  | 2.17576569  |
| O                                 | -1.71838856 | 0.94979749  | 2.74961269  |
| H                                 | -0.77265056 | 1.19857549  | 2.66730369  |
| C                                 | -3.40273556 | -0.36108651 | -0.15575731 |
| C                                 | -3.98618556 | -0.96458151 | 0.97451769  |
| C                                 | -4.14063156 | -0.26832951 | -1.34925031 |
| C                                 | -5.28891256 | -1.46024451 | 0.92125169  |
| H                                 | -3.41064756 | -1.04769251 | 1.89084169  |
| C                                 | -5.44391556 | -0.75803851 | -1.41505331 |
| H                                 | -3.66895056 | 0.16602949  | -2.22140131 |
| C                                 | -6.00161756 | -1.34656351 | -0.27537631 |
| H                                 | -5.75406656 | -1.93113151 | 1.77705369  |
| H                                 | -6.02781256 | -0.69858551 | -2.32400831 |
| N                                 | -7.36709356 | -1.86855751 | -0.33919831 |
| O                                 | -7.99800856 | -1.76116251 | -1.43088431 |
| O                                 | -7.85209956 | -2.40295251 | 0.70108869  |
| H                                 | 0.33762994  | 1.39229113  | 0.12656569  |
| H                                 | -1.54433421 | 0.07363244  | -1.06725569 |
| O                                 | -1.23497237 | -0.54484858 | 0.88963897  |
| H                                 | -1.50363301 | -0.23847887 | 1.75886797  |
| <b><sup>2</sup>TS<sub>H</sub></b> |             |             |             |
| Fe                                | 2.30966456  | -0.82693949 | 0.14062331  |
| O                                 | 0.99078156  | 0.30699251  | -0.42108369 |
| S                                 | 4.00212100  | -2.39198600 | 0.88456500  |
| H                                 | 5.06590500  | -1.89638500 | 0.15642200  |
| N                                 | 1.07663100  | -2.00807900 | 1.19623600  |
| C                                 | -0.26288700 | -2.80853400 | 2.90759500  |
| C                                 | -0.46939700 | -3.61411700 | 1.82291300  |
| H                                 | -0.71746200 | -2.86944500 | 3.88512000  |
| H                                 | -1.12627500 | -4.46694700 | 1.73677500  |

|    |             |             |             |
|----|-------------|-------------|-------------|
| N  | 2.01071900  | -2.04451500 | -1.49396100 |
| C  | 1.15043800  | -3.12970900 | -1.57124800 |
| C  | 1.18104700  | -3.68198900 | -2.90633900 |
| C  | 2.06810200  | -2.93756300 | -3.63022800 |
| H  | 0.59495200  | -4.52914000 | -3.23032800 |
| H  | 2.35476000  | -3.05476000 | -4.66481200 |
| N  | 3.76087500  | 0.11789500  | -0.90438000 |
| C  | 4.10234900  | -0.05408500 | -2.23942400 |
| C  | 4.49254100  | 1.20969900  | -0.45528700 |
| C  | 5.09421300  | 0.92499800  | -2.61777000 |
| C  | 5.33551600  | 1.70118400  | -1.51960400 |
| H  | 5.52883000  | 1.00415900  | -3.60325100 |
| H  | 6.00517600  | 2.54336700  | -1.42760300 |
| N  | 2.66200900  | 0.29785000  | 1.71810800  |
| C  | 3.49148300  | 1.93521700  | 3.13053600  |
| H  | 4.08293200  | 2.77747300  | 3.45745200  |
| C  | 3.55759500  | 1.35460300  | 1.81010200  |
| C  | 0.69798000  | -1.80417100 | 2.51639400  |
| C  | 0.35888400  | -3.11048600 | 0.75250400  |
| C  | 2.59409500  | -1.92250700 | -2.74602600 |
| C  | 4.40709900  | 1.78093300  | 0.80358800  |
| H  | 5.04295600  | 2.63379300  | 1.01108600  |
| C  | 1.14257100  | -0.77959000 | 3.33704900  |
| H  | 0.75097200  | -0.74177400 | 4.34713100  |
| C  | 0.38851000  | -3.63216700 | -0.53052900 |
| H  | -0.23778400 | -4.49268000 | -0.73625200 |
| C  | 3.56315400  | -0.99825100 | -3.09758100 |
| H  | 3.92804500  | -1.01534500 | -4.11827900 |
| C  | 2.56948200  | 1.21992700  | 3.84128100  |
| H  | 2.26044600  | 1.35667900  | 4.86712400  |
| C  | 2.06125500  | 0.18938600  | 2.96507700  |
| C  | -0.99411556 | 4.25258449  | -1.04748331 |
| H  | -0.35189556 | 5.05179349  | -1.39970231 |
| C  | -1.97391556 | 1.70218249  | 0.39388669  |
| C  | -1.98756056 | 0.16490849  | -0.09765831 |
| H  | -2.64240756 | 2.25594049  | -0.27256731 |
| Cl | -1.84903600 | 3.60188100  | -2.53806000 |
| Cl | -2.29593700 | 5.13720200  | 0.09883300  |
| C  | -0.13515256 | 3.22621549  | -0.30304731 |
| O  | 1.11091644  | 3.45397449  | -0.35773231 |
| N  | -0.61516656 | 2.17794149  | 0.41098769  |
| C  | -2.49353056 | 1.78550249  | 1.85720369  |
| H  | -3.51915056 | 1.42099649  | 1.91158769  |
| H  | -2.47055756 | 2.83363849  | 2.17576569  |
| O  | -1.71838856 | 0.94979749  | 2.74961269  |
| H  | -0.77265056 | 1.19857549  | 2.66730369  |



|                                    |             |             |             |
|------------------------------------|-------------|-------------|-------------|
| C                                  | -3.40273556 | -0.36108651 | -0.15575731 |
| C                                  | -3.98618556 | -0.96458151 | 0.97451769  |
| C                                  | -4.14063156 | -0.26832951 | -1.34925031 |
| C                                  | -5.28891256 | -1.46024451 | 0.92125169  |
| H                                  | -3.41064756 | -1.04769251 | 1.89084169  |
| C                                  | -5.44391556 | -0.75803851 | -1.41505331 |
| H                                  | -3.66895056 | 0.16602949  | -2.22140131 |
| C                                  | -6.00161756 | -1.34656351 | -0.27537631 |
| H                                  | -5.75406656 | -1.93113151 | 1.77705369  |
| H                                  | -6.02781256 | -0.69858551 | -2.32400831 |
| N                                  | -7.36709356 | -1.86855751 | -0.33919831 |
| O                                  | -7.99800856 | -1.76116251 | -1.43088431 |
| O                                  | -7.85209956 | -2.40295251 | 0.70108869  |
| H                                  | 0.33762994  | 1.39229113  | 0.12656569  |
| H                                  | -1.54433421 | 0.07363244  | -1.06725569 |
| O                                  | -1.23497237 | -0.54484858 | 0.88963897  |
| H                                  | -1.50363301 | -0.23847887 | 1.75886797  |
| <b><sup>2</sup>INT<sub>H</sub></b> |             |             |             |
| Fe                                 | 2.13033900  | -0.96599700 | 0.18218200  |
| O                                  | 1.69796900  | 0.23091300  | -1.11079700 |
| S                                  | 3.04101000  | -2.62478500 | 2.39634500  |
| H                                  | 1.76978300  | -3.00858200 | 2.78817300  |
| N                                  | 0.40096900  | -1.98569400 | 0.23346300  |
| C                                  | -1.78278500 | -2.62508100 | 0.70643900  |
| C                                  | -1.36886100 | -3.36455300 | -0.36681200 |
| H                                  | -2.73568400 | -2.65684900 | 1.21422900  |
| H                                  | -1.91714200 | -4.12035500 | -0.91015900 |
| N                                  | 2.82629400  | -2.23206900 | -1.24788400 |
| C                                  | 2.08134300  | -3.16929500 | -1.94384500 |
| C                                  | 2.88187100  | -3.76529100 | -2.99474600 |
| C                                  | 4.11113900  | -3.17725800 | -2.93754400 |
| H                                  | 2.53413900  | -4.53116400 | -3.67263300 |
| H                                  | 4.97506900  | -3.36350600 | -3.55859500 |
| N                                  | 4.01431100  | -0.23656100 | 0.37106500  |
| C                                  | 5.10210700  | -0.48282400 | -0.45071800 |
| C                                  | 4.42364300  | 0.75154500  | 1.25188500  |
| C                                  | 6.21528400  | 0.36324300  | -0.07223100 |
| C                                  | 5.79653000  | 1.12570000  | 0.97811500  |
| H                                  | 7.18211500  | 0.35550200  | -0.55386800 |
| H                                  | 6.35167500  | 1.86868700  | 1.53195900  |
| N                                  | 1.59748400  | -0.01610400 | 1.87045900  |
| C                                  | 1.57864900  | 1.45334200  | 3.67018200  |
| H                                  | 1.94514000  | 2.17746900  | 4.38304400  |
| C                                  | 2.35189300  | 0.92347600  | 2.57209600  |
| C                                  | -0.68208300 | -1.76673900 | 1.07786500  |
| C                                  | -0.01202700 | -2.96419500 | -0.66223600 |

|                               |             |             |             |
|-------------------------------|-------------|-------------|-------------|
| C                             | 4.06866000  | -2.21797100 | -1.85244700 |
| C                             | 3.65360700  | 1.28815300  | 2.27286000  |
| H                             | 4.11693100  | 2.03944800  | 2.90362800  |
| C                             | -0.69835700 | -0.87558000 | 2.14274600  |
| H                             | -1.60913900 | -0.81453400 | 2.72915100  |
| C                             | 0.76432500  | -3.50670200 | -1.67589300 |
| H                             | 0.30664900  | -4.26667800 | -2.30038100 |
| C                             | 5.13002300  | -1.40381800 | -1.48404700 |
| H                             | 6.05102100  | -1.49459900 | -2.04968700 |
| C                             | 0.35320500  | 0.84560200  | 3.63659900  |
| H                             | -0.47848300 | 0.98006100  | 4.31316000  |
| C                             | 0.35989900  | -0.06585100 | 2.51710000  |
| C                             | 0.29534500  | 4.16148000  | -0.74971700 |
| C                             | -1.92190000 | 1.13852700  | -0.89802400 |
| C                             | -3.33536700 | 1.76460500  | -1.07980400 |
| H                             | -3.45964000 | 1.92599700  | -2.15388800 |
| Cl                            | 1.75831800  | 4.68973400  | 0.11646300  |
| Cl                            | 0.02426900  | 4.84538500  | -2.36610400 |
| C                             | -0.45720400 | 2.99022800  | -0.33082700 |
| O                             | -0.71913700 | 2.86247600  | 1.02613100  |
| N                             | -0.89599100 | 2.15850200  | -1.19767400 |
| C                             | -1.68081200 | -0.01206200 | -1.87716000 |
| H                             | -2.36777500 | -0.83572300 | -1.68395900 |
| H                             | -0.65623300 | -0.37712100 | -1.75097100 |
| O                             | -1.89824500 | 0.39637000  | -3.25132100 |
| H                             | -1.24380300 | 1.09705700  | -3.46015600 |
| O                             | -3.35843600 | 3.03075000  | -0.36990600 |
| H                             | -4.15943000 | 3.52812200  | -0.62880600 |
| C                             | -4.42171400 | 0.82740100  | -0.57747500 |
| C                             | -5.04780900 | -0.07483000 | -1.45710900 |
| C                             | -4.80636000 | 0.85410400  | 0.77528500  |
| C                             | -6.03767200 | -0.94392700 | -0.99693600 |
| H                             | -4.75525900 | -0.09253500 | -2.50234500 |
| C                             | -5.79186600 | -0.00977200 | 1.24893300  |
| H                             | -4.33704300 | 1.57142700  | 1.43811000  |
| C                             | -6.39396600 | -0.89913300 | 0.35333500  |
| H                             | -6.53625200 | -1.64020900 | -1.65829300 |
| H                             | -6.10167700 | -0.00652200 | 2.28553900  |
| N                             | -7.43544700 | -1.80352600 | 0.84343400  |
| O                             | -7.70324600 | -1.79093900 | 2.08050500  |
| O                             | -8.02416300 | -2.54557300 | 0.00454900  |
| H                             | 0.90901400  | 0.81719000  | -1.13722100 |
| H                             | -0.17824000 | 3.47170700  | 1.56492800  |
| H                             | -1.83841100 | 0.75224300  | 0.11615200  |
| <sup>4</sup> INT <sub>H</sub> |             |             |             |
| Fe                            | 2.50540100  | -0.90253000 | 0.33304700  |

|    |             |             |             |
|----|-------------|-------------|-------------|
| O  | 1.55719500  | -0.25412700 | -1.05096800 |
| S  | 3.84566100  | -1.63922300 | 2.16540500  |
| H  | 2.79977900  | -2.20101200 | 2.93986800  |
| N  | 0.98904500  | -2.08259900 | 0.97268600  |
| C  | -0.92661300 | -2.86728100 | 2.00808100  |
| C  | -0.48452200 | -3.85630500 | 1.17283900  |
| H  | -1.78834200 | -2.87808300 | 2.66005600  |
| H  | -0.91387400 | -4.83389700 | 1.00785000  |
| N  | 3.18476500  | -2.38407000 | -0.84126800 |
| C  | 2.59627500  | -3.62359700 | -1.02678900 |
| C  | 3.36071600  | -4.38428300 | -1.99292900 |
| C  | 4.40526900  | -3.60049300 | -2.38762600 |
| H  | 3.11326300  | -5.38491600 | -2.31655800 |
| H  | 5.18550600  | -3.82955300 | -3.09790500 |
| N  | 4.11746400  | 0.20212000  | -0.14236000 |
| C  | 5.09709900  | -0.10959700 | -1.07127700 |
| C  | 4.41533200  | 1.47222900  | 0.32568100  |
| C  | 6.03754200  | 0.98399200  | -1.17535800 |
| C  | 5.61813800  | 1.95841200  | -0.31632800 |
| H  | 6.90163500  | 0.98522700  | -1.82271200 |
| H  | 6.06872200  | 2.91948100  | -0.11828200 |
| N  | 1.87272700  | 0.55434300  | 1.61451100  |
| C  | 1.80033700  | 2.47242000  | 2.88587800  |
| H  | 2.09958200  | 3.43492500  | 3.27449200  |
| C  | 2.52323000  | 1.74587900  | 1.85979600  |
| C  | -0.00956300 | -1.75842700 | 1.88040900  |
| C  | 0.70863600  | -3.36634600 | 0.52479100  |
| C  | 4.29509700  | -2.34750000 | -1.66651800 |
| C  | 3.68329700  | 2.18841900  | 1.25570200  |
| H  | 4.05536200  | 3.16831200  | 1.53714800  |
| C  | -0.10242500 | -0.56992600 | 2.58470300  |
| H  | -0.92416400 | -0.45922300 | 3.28170600  |
| C  | 1.45339400  | -4.08522700 | -0.39968200 |
| H  | 1.11035200  | -5.08305600 | -0.64941800 |
| C  | 5.18630400  | -1.29498000 | -1.78278500 |
| H  | 6.01411800  | -1.40893100 | -2.47371200 |
| C  | 0.73742200  | 1.69528200  | 3.26293300  |
| H  | -0.00980200 | 1.89786900  | 4.01589900  |
| C  | 0.79023500  | 0.48951700  | 2.47034200  |
| C  | 0.21222900  | 3.54266300  | -0.90097200 |
| C  | -2.40157500 | 0.90219800  | -0.54923200 |
| C  | -3.72578500 | 1.47530200  | -1.13822600 |
| H  | -3.62148400 | 1.46908000  | -2.22542500 |
| Cl | 0.86067900  | 4.94130700  | 0.01467600  |
| Cl | 0.80135900  | 3.36138900  | -2.56171300 |
| C  | -0.77464300 | 2.68529500  | -0.33475700 |

|                                       |             |             |             |
|---------------------------------------|-------------|-------------|-------------|
| O                                     | -1.16780100 | 2.89107800  | 0.97790500  |
| N                                     | -1.30550400 | 1.74258000  | -1.06000500 |
| C                                     | -2.14240400 | -0.52706900 | -1.04698400 |
| H                                     | -2.91196500 | -1.21277200 | -0.68582900 |
| H                                     | -1.17163200 | -0.87264000 | -0.68515900 |
| O                                     | -2.21282600 | -0.58779200 | -2.50077300 |
| H                                     | -1.50238300 | -0.01599900 | -2.86176600 |
| O                                     | -3.81824400 | 2.83868500  | -0.63187800 |
| H                                     | -4.50621100 | 3.33077100  | -1.12051600 |
| C                                     | -4.95289200 | 0.66315900  | -0.75333100 |
| C                                     | -5.37438600 | -0.40730900 | -1.56660700 |
| C                                     | -5.67354800 | 0.97200000  | 0.41172300  |
| C                                     | -6.49771100 | -1.15852800 | -1.22067200 |
| H                                     | -4.80425200 | -0.65881000 | -2.45475600 |
| C                                     | -6.79984500 | 0.22983300  | 0.76786400  |
| H                                     | -5.35153400 | 1.80855000  | 1.02069800  |
| C                                     | -7.19618600 | -0.82666600 | -0.05575300 |
| H                                     | -6.83930700 | -1.98453700 | -1.83027900 |
| H                                     | -7.36993400 | 0.45435800  | 1.65942900  |
| N                                     | -8.37883400 | -1.60843000 | 0.31166500  |
| O                                     | -8.99857800 | -1.29075500 | 1.36860000  |
| O                                     | -8.71849600 | -2.56742500 | -0.44017100 |
| H                                     | 0.75441100  | 0.30580800  | -1.05350200 |
| H                                     | -0.47407700 | 3.30942800  | 1.53336900  |
| H                                     | -2.47782100 | 0.92381100  | 0.54140900  |
| <b><sup>2</sup>TS-reb<sub>H</sub></b> |             |             |             |
| Fe                                    | 2.18521000  | -0.98130300 | 0.14937000  |
| O                                     | 0.52138500  | 0.13572400  | -0.46874800 |
| S                                     | 4.06397500  | -2.29380900 | 0.61206400  |
| H                                     | 4.31056900  | -1.82263100 | 1.88755400  |
| N                                     | 1.25254100  | -2.61203400 | -0.57895300 |
| C                                     | 0.12476700  | -4.63770500 | -0.69148200 |
| C                                     | 0.50407000  | -4.32109400 | -1.96451300 |
| H                                     | -0.42868700 | -5.50097800 | -0.35312600 |
| H                                     | 0.33194300  | -4.87919900 | -2.87289500 |
| N                                     | 2.91268400  | -0.62251400 | -1.69830800 |
| C                                     | 2.66068100  | -1.32357200 | -2.87118000 |
| C                                     | 3.44084800  | -0.77159200 | -3.95549100 |
| C                                     | 4.19361800  | 0.24143900  | -3.43118800 |
| H                                     | 3.41986000  | -1.13216700 | -4.97326500 |
| H                                     | 4.90447500  | 0.87728600  | -3.93791500 |
| N                                     | 3.12381500  | 0.63463300  | 0.86888400  |
| C                                     | 4.06713000  | 1.40140600  | 0.19378000  |
| C                                     | 3.01446300  | 1.18981000  | 2.13413700  |
| C                                     | 4.56325700  | 2.44480600  | 1.06348300  |
| C                                     | 3.90169200  | 2.32400300  | 2.25631500  |

|    |             |             |             |
|----|-------------|-------------|-------------|
| H  | 5.30844600  | 3.17514000  | 0.78429100  |
| H  | 4.00312900  | 2.93319700  | 3.14219100  |
| N  | 1.41130600  | -1.31049000 | 1.95922700  |
| C  | 0.78537600  | -1.10230800 | 4.18725500  |
| H  | 0.68739700  | -0.66268600 | 5.16870800  |
| C  | 1.48392800  | -0.49066400 | 3.07866900  |
| C  | 0.58807200  | -3.57062800 | 0.16820900  |
| C  | 1.22116700  | -3.06700100 | -1.89291900 |
| C  | 3.86702400  | 0.33117200  | -2.02561100 |
| C  | 2.19875300  | 0.69631700  | 3.14710800  |
| H  | 2.17089300  | 1.24614500  | 4.08099000  |
| C  | 0.34218600  | -3.48969800 | 1.53250700  |
| H  | -0.21663800 | -4.30241500 | 1.98336200  |
| C  | 1.85000000  | -2.44863200 | -2.96303100 |
| H  | 1.74744300  | -2.91166600 | -3.93869500 |
| C  | 4.41552300  | 1.25029100  | -1.14152700 |
| H  | 5.15756800  | 1.93489200  | -1.53863500 |
| C  | 0.31534800  | -2.30720700 | 3.74684000  |
| H  | -0.25027600 | -3.04561700 | 4.29557400  |
| C  | 0.69727000  | -2.43150400 | 2.35707700  |
| C  | 1.04759800  | 3.31807200  | 0.02229700  |
| H  | 2.01496000  | 3.20195500  | 0.49760200  |
| C  | -2.03523500 | 1.06773800  | 0.21731000  |
| C  | -2.88478100 | 0.83900300  | -1.07061300 |
| H  | -2.51700600 | 1.85831100  | 0.81320800  |
| H  | -2.42819900 | 0.00802200  | -1.62280500 |
| Cl | 1.32369200  | 3.11064900  | -1.80813800 |
| Cl | 0.55253700  | 5.10029300  | 0.35695800  |
| C  | -0.01217200 | 2.40052300  | 0.63390200  |
| O  | -0.17985700 | 2.46080400  | 1.87295800  |
| N  | -0.75659500 | 1.63658600  | -0.24690600 |
| C  | -1.93182500 | -0.17700400 | 1.11926700  |
| H  | -2.89829200 | -0.36496600 | 1.58897600  |
| H  | -1.18803100 | 0.00706100  | 1.90026700  |
| O  | -1.61790300 | -1.36362200 | 0.35239500  |
| H  | -0.75579600 | -1.18988400 | -0.09783600 |
| O  | -2.85102100 | 2.04524300  | -1.87327700 |
| H  | -1.91722000 | 2.34946200  | -1.89914300 |
| C  | -4.33280600 | 0.50587400  | -0.77985800 |
| C  | -4.70395500 | -0.81044000 | -0.44360200 |
| C  | -5.31723100 | 1.50673100  | -0.84562800 |
| C  | -6.03342200 | -1.12085400 | -0.16250100 |
| H  | -3.94171400 | -1.58158500 | -0.39850700 |
| C  | -6.65111200 | 1.20755500  | -0.56839900 |
| H  | -5.02404900 | 2.50624000  | -1.13847600 |
| C  | -6.99120600 | -0.10416400 | -0.22670600 |

|                                       |             |             |             |
|---------------------------------------|-------------|-------------|-------------|
| H                                     | -6.33907700 | -2.12568000 | 0.09722400  |
| H                                     | -7.42373700 | 1.96349500  | -0.61674800 |
| N                                     | -8.38773000 | -0.42514200 | 0.06471400  |
| O                                     | -9.24345600 | 0.50515100  | -0.00386200 |
| O                                     | -8.67574500 | -1.61901600 | 0.37409000  |
| H                                     | 0.68355500  | 0.36151300  | -1.41098100 |
| <b><sup>4</sup>TS-reb<sub>H</sub></b> |             |             |             |
| Fe                                    | 2.26228800  | -0.92292400 | -0.14327500 |
| O                                     | 0.94833500  | 0.61371800  | 0.05552500  |
| S                                     | 3.83483700  | -2.69386500 | -0.43166500 |
| H                                     | 4.24975200  | -2.78960200 | 0.88194400  |
| N                                     | 0.85929800  | -2.23051800 | 0.47569500  |
| C                                     | -0.43491200 | -3.63158700 | 1.79296300  |
| C                                     | -0.80001900 | -3.84905400 | 0.49389300  |
| H                                     | -0.82144100 | -4.09966400 | 2.68608700  |
| H                                     | -1.54493800 | -4.53100600 | 0.11138800  |
| N                                     | 1.71176900  | -1.21725900 | -2.03670100 |
| C                                     | 0.75038800  | -2.11580400 | -2.49853200 |
| C                                     | 0.67153100  | -2.04584800 | -3.93572500 |
| C                                     | 1.57374200  | -1.10508000 | -4.34804600 |
| H                                     | -0.00163000 | -2.63684200 | -4.53867700 |
| H                                     | 1.78634600  | -0.77744400 | -5.35485400 |
| N                                     | 3.56455900  | 0.48626100  | -0.73865200 |
| C                                     | 3.82601400  | 0.88523100  | -2.04586000 |
| C                                     | 4.47285200  | 1.17815100  | 0.06166000  |
| C                                     | 4.88675400  | 1.86368100  | -2.05478200 |
| C                                     | 5.28513500  | 2.04218100  | -0.76093700 |
| H                                     | 5.26992900  | 2.33915800  | -2.94542100 |
| H                                     | 6.05859300  | 2.69368500  | -0.38207700 |
| N                                     | 2.85273400  | -0.66223300 | 1.76354900  |
| C                                     | 3.94688400  | 0.10388000  | 3.65644700  |
| H                                     | 4.64361100  | 0.66947700  | 4.25736700  |
| C                                     | 3.84278000  | 0.19838400  | 2.22085200  |
| C                                     | 0.60930400  | -2.63424100 | 1.78123600  |
| C                                     | 0.01375000  | -2.98367100 | -0.32767200 |
| C                                     | 2.22211300  | -0.58723800 | -3.16916500 |
| C                                     | 4.60265400  | 1.04880200  | 1.43144300  |
| H                                     | 5.34836000  | 1.66074200  | 1.92597500  |
| C                                     | 1.27862200  | -2.18678900 | 2.90737400  |
| H                                     | 0.96205700  | -2.57593300 | 3.86777900  |
| C                                     | -0.03808300 | -2.93383700 | -1.71024500 |
| H                                     | -0.75284300 | -3.57633200 | -2.21112200 |
| C                                     | 3.19832100  | 0.39475000  | -3.17641700 |
| H                                     | 3.49944100  | 0.79839500  | -4.13615300 |
| C                                     | 3.00824300  | -0.80016500 | 4.07225700  |
| H                                     | 2.78526800  | -1.11909200 | 5.07969900  |

|                         |             |             |             |
|-------------------------|-------------|-------------|-------------|
| C                       | 2.32054100  | -1.27388900 | 2.89589900  |
| C                       | -0.83369300 | 4.33461200  | -0.11403900 |
| H                       | -0.20172800 | 5.14958000  | -0.44912200 |
| C                       | -1.72942400 | 1.44763900  | 0.87885100  |
| C                       | -1.93228400 | 0.13699100  | 0.02424700  |
| H                       | -2.47352400 | 2.17979500  | 0.53648800  |
| H                       | -1.36091000 | -0.64396700 | 0.53274700  |
| Cl                      | -2.15528500 | 4.13220300  | -1.42154400 |
| Cl                      | -1.59373700 | 4.88460700  | 1.50379800  |
| C                       | 0.03477000  | 3.08052300  | 0.00868900  |
| O                       | 1.19978600  | 3.18884700  | -0.48155600 |
| N                       | -0.39895300 | 1.98600000  | 0.64462900  |
| C                       | -1.89906100 | 1.18881100  | 2.38316600  |
| H                       | -2.90414500 | 0.82337300  | 2.60004400  |
| H                       | -1.74172900 | 2.12583600  | 2.92991800  |
| O                       | -0.99050000 | 0.15541400  | 2.84837300  |
| H                       | -0.08154100 | 0.37035100  | 2.54744500  |
| O                       | -1.43616700 | 0.33394000  | -1.31334900 |
| H                       | -0.45342300 | 0.39371600  | -1.23589200 |
| C                       | -3.38837600 | -0.25763700 | -0.04899200 |
| C                       | -3.94528400 | -1.09799400 | 0.93228900  |
| C                       | -4.20016300 | 0.21513300  | -1.09531900 |
| C                       | -5.29415300 | -1.44999900 | 0.88530800  |
| H                       | -3.31333700 | -1.48412900 | 1.72569700  |
| C                       | -5.54934700 | -0.13030700 | -1.15560400 |
| H                       | -3.75469500 | 0.83418000  | -1.86368700 |
| C                       | -6.07962100 | -0.95666200 | -0.15974900 |
| H                       | -5.74059000 | -2.09607800 | 1.62950400  |
| H                       | -6.19070600 | 0.22230000  | -1.95251100 |
| N                       | -7.49442800 | -1.32444500 | -0.21771800 |
| O                       | -8.19188000 | -0.87020500 | -1.17097500 |
| O                       | -7.95356600 | -2.07962700 | 0.68892700  |
| H                       | 1.49753900  | 1.40645100  | -0.21317800 |
| <b><sup>2</sup>P-OH</b> |             |             |             |
| Fe                      | -1.66855500 | -1.54280800 | 0.36036900  |
| S                       | -2.80402000 | -3.37470600 | 1.13545800  |
| H                       | -1.99717700 | -3.65634400 | 2.22294300  |
| N                       | 0.16104700  | -2.32896900 | 0.62763500  |
| C                       | 2.03039600  | -3.68862500 | 0.36357000  |
| C                       | 2.13183400  | -3.10538100 | 1.59557800  |
| H                       | 2.71329400  | -4.38144300 | -0.10624500 |
| H                       | 2.91227600  | -3.22829200 | 2.33231100  |
| N                       | -1.49453600 | -0.64026500 | 2.14655900  |
| C                       | -0.48076000 | -0.79542200 | 3.09484900  |
| C                       | -0.82726500 | -0.10209100 | 4.31274200  |
| C                       | -2.05846300 | 0.45789400  | 4.11936000  |

|    |             |             |             |
|----|-------------|-------------|-------------|
| H  | -0.20525800 | -0.06321300 | 5.19508800  |
| H  | -2.63983300 | 1.04986300  | 4.81090000  |
| N  | -3.32248900 | -0.48032500 | -0.01943000 |
| C  | -4.04904700 | 0.26936800  | 0.89849600  |
| C  | -4.06262800 | -0.44179200 | -1.19630600 |
| C  | -5.25424200 | 0.78146900  | 0.28349100  |
| C  | -5.25907400 | 0.34874200  | -1.00994100 |
| H  | -5.98199200 | 1.40078400  | 0.78665200  |
| H  | -5.99394600 | 0.53795400  | -1.77843700 |
| N  | -1.64820600 | -2.13291300 | -1.55275600 |
| C  | -2.29185300 | -2.62872000 | -3.73432900 |
| H  | -2.87651300 | -2.60060500 | -4.64199000 |
| C  | -2.60777000 | -1.89070700 | -2.53309300 |
| C  | 0.80973400  | -3.20600700 | -0.23962100 |
| C  | 0.96666600  | -2.26976600 | 1.76566300  |
| C  | -2.47568700 | 0.12359600  | 2.77825700  |
| C  | -3.72527100 | -1.08970200 | -2.37165800 |
| H  | -4.39581200 | -0.98314900 | -3.21727100 |
| C  | 0.37732800  | -3.54020700 | -1.51208800 |
| H  | 0.98565800  | -4.23500200 | -2.08103200 |
| C  | 0.67646800  | -1.53811400 | 2.90909900  |
| H  | 1.37839200  | -1.59347000 | 3.73483800  |
| C  | -3.66561500 | 0.53415500  | 2.20151800  |
| H  | -4.33381700 | 1.13579700  | 2.80768800  |
| C  | -1.15293500 | -3.33680900 | -3.48115700 |
| H  | -0.61645400 | -4.00142300 | -4.14221100 |
| C  | -0.75255500 | -3.03042700 | -2.12668100 |
| C  | -1.36497500 | 4.45504000  | -0.46788900 |
| H  | -1.31889800 | 5.53319200  | -0.57341500 |
| C  | 1.50838000  | 1.95235800  | -1.17713000 |
| C  | 1.89043500  | 0.85145200  | -0.14943700 |
| H  | 2.23374300  | 2.77085900  | -1.15234800 |
| H  | 1.39566800  | -0.07600700 | -0.45064000 |
| Cl | -2.76784700 | 3.89409200  | -1.56065300 |
| Cl | -1.73793100 | 4.14243700  | 1.33926800  |
| C  | -0.02028600 | 3.89621600  | -0.90159700 |
| O  | 0.83109200  | 4.70078000  | -1.34837800 |
| N  | 0.22621900  | 2.56474200  | -0.80789200 |
| C  | 1.44583800  | 1.37648300  | -2.60525300 |
| H  | 2.44369200  | 1.07977100  | -2.93551800 |
| H  | 1.07445200  | 2.15506900  | -3.28253300 |
| O  | 0.64152000  | 0.17095200  | -2.68536300 |
| H  | -0.26750800 | 0.33730200  | -2.35740800 |
| O  | 1.35725300  | 1.28084300  | 1.14802700  |
| H  | 1.43202200  | 0.54928300  | 1.79774700  |
| C  | 3.38913300  | 0.62970900  | -0.09800600 |



|                         |             |             |             |
|-------------------------|-------------|-------------|-------------|
| C                       | 3.97420800  | -0.39366400 | -0.86405900 |
| C                       | 4.20516500  | 1.45225200  | 0.69926200  |
| C                       | 5.35512700  | -0.59260100 | -0.84504100 |
| H                       | 3.34354600  | -1.03718200 | -1.46874300 |
| C                       | 5.58560900  | 1.26052600  | 0.73239700  |
| H                       | 3.74707600  | 2.23044600  | 1.29883100  |
| C                       | 6.14087900  | 0.23895100  | -0.04391900 |
| H                       | 5.82591500  | -1.37417100 | -1.42641000 |
| H                       | 6.23192200  | 1.88061300  | 1.33939000  |
| N                       | 7.59067800  | 0.02885800  | -0.01083900 |
| O                       | 8.28538000  | 0.78595400  | 0.72631900  |
| O                       | 8.07400300  | -0.90015000 | -0.72037900 |
| O                       | -0.80669100 | 1.67152300  | -0.38208300 |
| H                       | -0.52758000 | 1.43050000  | 0.54386600  |
| <b><sup>4</sup>P-OH</b> |             |             |             |
| Fe                      | -1.08824800 | -1.97713900 | 0.11327200  |
| S                       | -1.83452800 | -4.29516000 | 0.22034000  |
| H                       | -2.84797800 | -4.12078300 | 1.14388200  |
| N                       | 0.39306100  | -2.05640300 | 1.51158200  |
| C                       | 2.32169800  | -2.75357900 | 2.61018700  |
| C                       | 1.44252400  | -2.33155900 | 3.56940500  |
| H                       | 3.32038300  | -3.14251300 | 2.74421900  |
| H                       | 1.58262400  | -2.30867800 | 4.64011700  |
| N                       | -2.31053400 | -1.20349800 | 1.50658500  |
| C                       | -2.09260600 | -1.15207100 | 2.88347100  |
| C                       | -3.27942500 | -0.68019200 | 3.55259400  |
| C                       | -4.21791000 | -0.43464700 | 2.58870400  |
| H                       | -3.36750100 | -0.54858200 | 4.62095200  |
| H                       | -5.22283800 | -0.05939700 | 2.71305700  |
| N                       | -2.34312900 | -1.30299600 | -1.31335300 |
| C                       | -3.63805700 | -0.82532100 | -1.13156000 |
| C                       | -2.17776100 | -1.41908400 | -2.69123000 |
| C                       | -4.27517900 | -0.62050200 | -2.41093000 |
| C                       | -3.37495700 | -0.98364700 | -3.37166100 |
| H                       | -5.27917300 | -0.24447300 | -2.54042800 |
| H                       | -3.49613100 | -0.96734300 | -4.44464200 |
| N                       | 0.29396800  | -2.33537500 | -1.30010500 |
| C                       | 1.26836900  | -2.84236800 | -3.34634000 |
| H                       | 1.36761500  | -2.94303300 | -4.41702700 |
| C                       | 0.09444600  | -2.33821200 | -2.67990900 |
| C                       | 1.66994100  | -2.60187900 | 1.33446400  |
| C                       | 0.23778600  | -1.91940600 | 2.89527300  |
| C                       | -3.61639600 | -0.75037600 | 1.31742800  |
| C                       | -1.04963400 | -1.90429800 | -3.32750500 |
| H                       | -1.05963000 | -1.94277600 | -4.41049700 |
| C                       | 2.22077400  | -2.96194300 | 0.11785900  |

|    |             |             |             |
|----|-------------|-------------|-------------|
| H  | 3.22482100  | -3.37092300 | 0.12048100  |
| C  | -0.91343300 | -1.48649000 | 3.52926300  |
| H  | -0.89501600 | -1.41201900 | 4.61073300  |
| C  | -4.23765200 | -0.58132500 | 0.09181200  |
| H  | -5.25543800 | -0.20864500 | 0.08996100  |
| C  | 2.18367300  | -3.15066500 | -2.37681500 |
| H  | 3.17727200  | -3.55635300 | -2.49919000 |
| C  | 1.58276000  | -2.83130600 | -1.10585200 |
| C  | -2.08024700 | 4.40047700  | 0.70978400  |
| H  | -2.02051600 | 5.35008100  | 1.22962400  |
| C  | 0.80245300  | 2.57100000  | -1.12777500 |
| C  | 1.23970500  | 1.16370500  | -0.59951900 |
| H  | 1.49979400  | 3.34184600  | -0.78881200 |
| H  | 0.98431600  | 0.42559800  | -1.36547700 |
| Cl | -3.38509000 | 4.61994900  | -0.60556100 |
| Cl | -2.61496000 | 3.15425000  | 1.99833500  |
| C  | -0.70402700 | 4.10963000  | 0.13313000  |
| O  | 0.19421400  | 4.96592000  | 0.30616200  |
| N  | -0.49100300 | 2.96363300  | -0.56409500 |
| C  | 0.73846300  | 2.57844600  | -2.66679700 |
| H  | 1.72952600  | 2.37916700  | -3.08323100 |
| H  | 0.41378700  | 3.57133700  | -3.00288500 |
| O  | -0.12474500 | 1.53551600  | -3.18730700 |
| H  | -1.00071300 | 1.59249900  | -2.74557200 |
| O  | 0.44242700  | 0.89187500  | 0.60213700  |
| H  | 0.60201400  | -0.02141700 | 0.93892600  |
| C  | 2.72539500  | 1.10916400  | -0.30900500 |
| C  | 3.59993500  | 0.48698000  | -1.21604300 |
| C  | 3.24358200  | 1.69350400  | 0.86184800  |
| C  | 4.97348400  | 0.45259500  | -0.96993400 |
| H  | 3.20330000  | 0.01686700  | -2.11017400 |
| C  | 4.61184000  | 1.66170600  | 1.12345500  |
| H  | 2.56588300  | 2.16216700  | 1.56631000  |
| C  | 5.45860700  | 1.04090600  | 0.19951400  |
| H  | 5.66359300  | -0.02179100 | -1.65496800 |
| H  | 5.03034500  | 2.10453700  | 2.01749700  |
| N  | 6.89797800  | 0.99816100  | 0.47037900  |
| O  | 7.31955600  | 1.53366600  | 1.53545300  |
| O  | 7.64601200  | 0.42544400  | -0.37403200 |
| O  | -1.55211100 | 2.01560900  | -0.72674200 |
| H  | -1.30673000 | 1.30705500  | -0.06676300 |

### OAR pathway

#### <sup>2</sup>TS<sub>0</sub>

|    |         |          |          |
|----|---------|----------|----------|
| Fe | 2.02907 | -1.01456 | 0.09997  |
| O  | 0.74175 | 0.42431  | -0.52723 |

|    |          |          |          |
|----|----------|----------|----------|
| S  | 3.59486  | -2.64259 | 0.51012  |
| H  | 3.01394  | -3.2031  | 1.63262  |
| N  | 0.51827  | -2.3394  | 0.27253  |
| C  | -1.12044 | -3.7571  | 1.11015  |
| C  | -0.9841  | -4.03808 | -0.22009 |
| H  | -1.7847  | -4.21765 | 1.82716  |
| H  | -1.5191  | -4.76976 | -0.80782 |
| N  | 2.13874  | -1.34293 | -1.87748 |
| C  | 1.42622  | -2.29658 | -2.58916 |
| C  | 1.825    | -2.26885 | -3.98246 |
| C  | 2.77829  | -1.30021 | -4.10777 |
| H  | 1.41784  | -2.91203 | -4.74896 |
| H  | 3.31038  | -0.99445 | -4.99688 |
| N  | 3.47902  | 0.37747  | -0.06972 |
| C  | 4.14541  | 0.76277  | -1.22273 |
| C  | 4.0631   | 1.08282  | 0.96917  |
| C  | 5.16023  | 1.7446   | -0.89872 |
| C  | 5.11363  | 1.93758  | 0.45294  |
| H  | 5.82227  | 2.20364  | -1.61877 |
| H  | 5.72544  | 2.59074  | 1.05832  |
| N  | 1.80729  | -0.57461 | 2.06772  |
| C  | 2.30421  | 0.16149  | 4.21309  |
| H  | 2.80548  | 0.7041   | 5.00162  |
| C  | 2.65676  | 0.23939  | 2.81502  |
| C  | -0.17769 | -2.70348 | 1.42039  |
| C  | 0.0399   | -3.15809 | -0.74099 |
| C  | 2.9792   | -0.72842 | -2.79156 |
| C  | 3.68757  | 1.01535  | 2.30378  |
| H  | 4.24711  | 1.62142  | 3.00819  |
| C  | 0.02113  | -2.16432 | 2.68383  |
| H  | -0.58042 | -2.55614 | 3.49708  |
| C  | 0.46078  | -3.14061 | -2.06296 |
| H  | -0.01573 | -3.83733 | -2.74415 |
| C  | 3.90463  | 0.26059  | -2.49254 |
| H  | 4.5047   | 0.64897  | -3.3086  |
| C  | 1.26053  | -0.71713 | 4.32206  |
| H  | 0.74775  | -1.03825 | 5.21754  |
| C  | 0.96443  | -1.19462 | 2.99218  |
| C  | 0.46825  | 3.7999   | -1.33594 |
| H  | 1.44002  | 4.28187  | -1.29309 |
| C  | -1.9797  | 1.89672  | -0.4467  |
| C  | -2.44307 | 0.43734  | -0.74728 |
| H  | -1.97024 | 2.43461  | -1.39652 |
| H  | -2.18128 | -0.19175 | 0.11061  |
| Cl | 0.39055  | 2.84639  | -2.89996 |
| Cl | -0.47244 | 4.90314  | -0.25736 |

|                              |             |             |             |
|------------------------------|-------------|-------------|-------------|
| C                            | 0.22991     | 3.1098      | -0.00521    |
| O                            | 0.66652     | 3.61527     | 1.02385     |
| N                            | -0.53719    | 1.84952     | 0.08365     |
| C                            | -2.77857    | 2.66965     | 0.60022     |
| H                            | -3.83391    | 2.68974     | 0.31331     |
| H                            | -2.41923    | 3.70353     | 0.67595     |
| O                            | -2.57636    | 1.94967     | 1.85243     |
| H                            | -2.86317    | 2.4672      | 2.62838     |
| O                            | -2.13617    | -0.05486    | -2.06734    |
| H                            | -2.77912    | -0.78639    | -2.2518     |
| C                            | -3.93703    | 0.34917     | -0.99352    |
| C                            | -4.82874    | 0.20401     | 0.08547     |
| C                            | -4.4378     | 0.39131     | -2.30518    |
| C                            | -6.20253    | 0.11741     | -0.13621    |
| H                            | -4.43928    | 0.15826     | 1.09707     |
| C                            | -5.81046    | 0.30545     | -2.54066    |
| H                            | -3.73803    | 0.46151     | -3.12761    |
| C                            | -6.67435    | 0.17387     | -1.45066    |
| H                            | -6.9051     | 0.00011     | 0.67816     |
| H                            | -6.21683    | 0.33292     | -3.54309    |
| N                            | -8.11668    | 0.0855      | -1.69011    |
| O                            | -8.52756    | 0.13819     | -2.88494    |
| O                            | -8.88063    | -0.03569    | -0.68845    |
| H                            | -0.57422    | 1.58353     | 1.08897     |
| <sup>4</sup> TS <sub>0</sub> |             |             |             |
| Fe                           | -2.06555600 | -1.00711200 | -0.00635600 |
| O                            | -0.86136700 | 0.44290500  | 0.52162400  |
| S                            | -3.75150300 | -2.75434400 | -0.21823900 |
| H                            | -2.89738400 | -3.84073500 | -0.24190600 |
| N                            | -0.48786700 | -2.39804800 | -0.34948600 |
| C                            | 1.13397700  | -3.70038700 | -1.35904200 |
| C                            | 1.21907300  | -3.91703500 | -0.00784100 |
| H                            | 1.73523700  | -4.14256500 | -2.14054700 |
| H                            | 1.90321900  | -4.56750000 | 0.51772700  |
| N                            | -1.89541100 | -1.32435300 | 1.96160700  |
| C                            | -1.04129500 | -2.22188700 | 2.59968700  |
| C                            | -1.31032800 | -2.19171000 | 4.02225600  |
| C                            | -2.32506900 | -1.29918800 | 4.23013500  |
| H                            | -0.78434100 | -2.78365400 | 4.75696300  |
| H                            | -2.79081000 | -1.02970800 | 5.16686700  |
| N                            | -3.66692200 | 0.30267700  | 0.30339700  |
| C                            | -4.16452600 | 0.68924800  | 1.52645800  |
| C                            | -4.29481300 | 1.05714400  | -0.65936600 |
| C                            | -5.18050700 | 1.71169000  | 1.32601100  |
| C                            | -5.26129200 | 1.93793500  | -0.02191100 |
| H                            | -5.74685200 | 2.18709400  | 2.11395300  |

|    |             |             |             |
|----|-------------|-------------|-------------|
| H  | -5.90247500 | 2.63574400  | -0.54084800 |
| N  | -2.08495000 | -0.61602000 | -1.99082200 |
| C  | -2.88354000 | 0.03192800  | -4.06085700 |
| H  | -3.49096200 | 0.54173600  | -4.79450200 |
| C  | -3.03491000 | 0.17512700  | -2.62955800 |
| C  | 0.06464000  | -2.74105900 | -1.56880800 |
| C  | 0.20012500  | -3.09563500 | 0.61976200  |
| C  | -2.70312000 | -0.75595800 | 2.94106800  |
| C  | -4.00835100 | 0.97191300  | -2.02041200 |
| H  | -4.60879300 | 1.58262700  | -2.68711800 |
| C  | -0.37237100 | -2.23206700 | -2.79105500 |
| H  | 0.10615500  | -2.61951200 | -3.68531500 |
| C  | -0.07576900 | -3.01504200 | 1.98735800  |
| H  | 0.52637400  | -3.63311400 | 2.64567400  |
| C  | -3.72695300 | 0.17064000  | 2.74402900  |
| H  | -4.22835200 | 0.52625400  | 3.63889100  |
| C  | -1.87095100 | -0.86324300 | -4.28077700 |
| H  | -1.49526100 | -1.22239300 | -5.22809900 |
| C  | -1.38183400 | -1.28897800 | -2.98815600 |
| C  | -0.43892100 | 3.74433000  | 0.50772300  |
| H  | -1.33540900 | 4.34660400  | 0.60533900  |
| C  | 1.57959300  | 1.52837300  | -0.46213100 |
| C  | 2.02270800  | 0.14864700  | 0.13122200  |
| H  | 1.83924600  | 2.29172400  | 0.27207400  |
| H  | 1.58959300  | -0.63877400 | -0.49647500 |
| Cl | 0.01597900  | 3.15764400  | 2.19515200  |
| Cl | 0.87318300  | 4.95298700  | -0.14063800 |
| C  | -0.70469100 | 2.69301700  | -0.55562700 |
| O  | -1.65147300 | 2.89372000  | -1.33292800 |
| N  | 0.09456300  | 1.54180100  | -0.67302300 |
| C  | 2.21174200  | 1.87761200  | -1.81341800 |
| H  | 3.30254000  | 1.86721900  | -1.72546900 |
| H  | 1.89220500  | 2.87711600  | -2.13189400 |
| O  | 1.74521400  | 0.85618300  | -2.74757400 |
| H  | 1.95235700  | 1.09356300  | -3.67136200 |
| O  | 1.54078600  | 0.05650800  | 1.48185400  |
| C  | 3.53103900  | -0.00641800 | 0.15941000  |
| C  | 4.21744800  | -0.53060500 | -0.95154000 |
| C  | 4.25342100  | 0.35891200  | 1.30799400  |
| C  | 5.60410300  | -0.67430700 | -0.92766300 |
| H  | 3.65700900  | -0.82424500 | -1.83278900 |
| C  | 5.64111500  | 0.22105000  | 1.34549800  |
| H  | 3.70891600  | 0.72128700  | 2.17029300  |
| C  | 6.29827900  | -0.29090400 | 0.22337300  |
| H  | 6.15010100  | -1.07922400 | -1.76942500 |
| H  | 6.21536500  | 0.49519100  | 2.22064100  |

|                                    |             |             |             |
|------------------------------------|-------------|-------------|-------------|
| N                                  | 7.75433600  | -0.43757600 | 0.25456700  |
| O                                  | 8.36753500  | -0.09078400 | 1.30526200  |
| O                                  | 8.32966600  | -0.90172300 | -0.77318700 |
| H                                  | -0.17667800 | 0.98381800  | -1.49015200 |
| H                                  | 0.54447600  | 0.11243800  | 1.43080600  |
| <b><sup>2</sup>INT<sub>o</sub></b> |             |             |             |
| Fe                                 | 2.02907300  | -1.01455900 | 0.09997000  |
| O                                  | 0.69818000  | 0.47301100  | -0.54845900 |
| S                                  | 3.59485600  | -2.64258800 | 0.51011700  |
| H                                  | 3.01393700  | -3.20310100 | 1.63261600  |
| N                                  | 0.51827300  | -2.33940300 | 0.27252600  |
| C                                  | -1.12044100 | -3.75709800 | 1.11015100  |
| C                                  | -0.98409600 | -4.03808400 | -0.22008700 |
| H                                  | -1.78469800 | -4.21764900 | 1.82715500  |
| H                                  | -1.51909600 | -4.76975800 | -0.80781600 |
| N                                  | 2.13874200  | -1.34292800 | -1.87748300 |
| C                                  | 1.42621600  | -2.29657500 | -2.58916000 |
| C                                  | 1.82500400  | -2.26885300 | -3.98245700 |
| C                                  | 2.77828900  | -1.30021200 | -4.10777300 |
| H                                  | 1.41783700  | -2.91203300 | -4.74895900 |
| H                                  | 3.31038400  | -0.99445200 | -4.99688000 |
| N                                  | 3.47902100  | 0.37747000  | -0.06971600 |
| C                                  | 4.14541100  | 0.76277000  | -1.22273100 |
| C                                  | 4.06310100  | 1.08282100  | 0.96917000  |
| C                                  | 5.16023400  | 1.74460100  | -0.89871900 |
| C                                  | 5.11363200  | 1.93757500  | 0.45294400  |
| H                                  | 5.82226500  | 2.20363500  | -1.61877300 |
| H                                  | 5.72543800  | 2.59073800  | 1.05831500  |
| N                                  | 1.80728700  | -0.57461000 | 2.06772000  |
| C                                  | 2.30421000  | 0.16149300  | 4.21309100  |
| H                                  | 2.80548300  | 0.70410400  | 5.00161700  |
| C                                  | 2.65676200  | 0.23938800  | 2.81501600  |
| C                                  | -0.17769200 | -2.70348000 | 1.42038500  |
| C                                  | 0.03990100  | -3.15809200 | -0.74099200 |
| C                                  | 2.97920000  | -0.72841800 | -2.79156200 |
| C                                  | 3.68757200  | 1.01535300  | 2.30378400  |
| H                                  | 4.24710900  | 1.62142400  | 3.00818700  |
| C                                  | 0.02113000  | -2.16431500 | 2.68382900  |
| H                                  | -0.58042100 | -2.55613700 | 3.49708400  |
| C                                  | 0.46077900  | -3.14061200 | -2.06295900 |
| H                                  | -0.01572700 | -3.83732600 | -2.74414500 |
| C                                  | 3.90462700  | 0.26059100  | -2.49253900 |
| H                                  | 4.50470200  | 0.64897300  | -3.30859600 |
| C                                  | 1.26052800  | -0.71713200 | 4.32206000  |
| H                                  | 0.74774800  | -1.03825300 | 5.21753700  |
| C                                  | 0.96442800  | -1.19462000 | 2.99217800  |

|                                    |             |             |             |
|------------------------------------|-------------|-------------|-------------|
| C                                  | 0.73657400  | 3.49822900  | -0.69879700 |
| H                                  | 1.70850300  | 3.98030600  | -0.73664300 |
| C                                  | -1.54238300 | 1.40636500  | 0.21539400  |
| C                                  | -2.07945600 | 0.02993400  | -0.28646100 |
| H                                  | -1.69658200 | 2.12640700  | -0.59042000 |
| H                                  | -1.67705500 | -0.75535900 | 0.36288400  |
| Cl                                 | 0.35731000  | 2.88169400  | -2.38326300 |
| Cl                                 | -0.47243800 | 4.90314200  | -0.25736100 |
| C                                  | 0.73250700  | 2.54718100  | 0.48416000  |
| O                                  | 1.35876900  | 2.84105500  | 1.49733700  |
| N                                  | -0.02841800 | 1.28044200  | 0.45285000  |
| C                                  | -2.12249600 | 1.93424100  | 1.52553500  |
| H                                  | -3.21192400 | 1.99165000  | 1.44611400  |
| H                                  | -1.73650900 | 2.93788900  | 1.74341800  |
| O                                  | -1.70836200 | 0.97854500  | 2.54653100  |
| H                                  | -1.83922400 | 1.32158600  | 3.45063400  |
| O                                  | -1.63921100 | -0.15020900 | -1.64760800 |
| H                                  | -0.64882400 | -0.11294600 | -1.63065900 |
| C                                  | -3.59462600 | -0.03547400 | -0.26882100 |
| C                                  | -4.27695100 | -0.41463800 | 0.90212500  |
| C                                  | -4.32550500 | 0.26295700  | -1.43060100 |
| C                                  | -5.66947200 | -0.48117100 | 0.92179200  |
| H                                  | -3.71030900 | -0.65771400 | 1.79485000  |
| C                                  | -5.71943000 | 0.19997900  | -1.42426700 |
| H                                  | -3.78642000 | 0.51276200  | -2.33502400 |
| C                                  | -6.37214800 | -0.16758900 | -0.24503700 |
| H                                  | -6.21365000 | -0.77550100 | 1.80937900  |
| H                                  | -6.30134900 | 0.42295900  | -2.30880100 |
| N                                  | -7.83531900 | -0.23357100 | -0.23033000 |
| O                                  | -8.45632100 | 0.05317000  | -1.29397300 |
| O                                  | -8.40572500 | -0.57102900 | 0.84781200  |
| H                                  | 0.11377800  | 0.81471600  | 1.37246400  |
| <b><sup>4</sup>INT<sub>0</sub></b> |             |             |             |
| Fe                                 | 2.17612100  | -1.05258500 | 0.12028400  |
| O                                  | 0.62761200  | 0.70873200  | -0.63758800 |
| S                                  | 3.89002400  | -2.77394000 | 0.63605800  |
| H                                  | 3.14157600  | -3.89180700 | 0.31673800  |
| N                                  | 0.65473900  | -2.36312400 | -0.00639100 |
| C                                  | -1.03153900 | -3.85558300 | 0.55071200  |
| C                                  | -0.80723700 | -3.98216600 | -0.79268900 |
| H                                  | -1.74452600 | -4.38918000 | 1.16233500  |
| H                                  | -1.30339400 | -4.63647700 | -1.49442400 |
| N                                  | 2.41537900  | -1.14841200 | -1.88207900 |
| C                                  | 1.74605300  | -1.98325600 | -2.76497600 |
| C                                  | 2.27984200  | -1.81472800 | -4.09999600 |
| C                                  | 3.27952200  | -0.88797000 | -4.01847200 |

|    |             |             |             |
|----|-------------|-------------|-------------|
| H  | 1.92946700  | -2.34780700 | -4.97176800 |
| H  | 3.91110100  | -0.51261600 | -4.81042100 |
| N  | 3.58207200  | 0.37906800  | 0.22576600  |
| C  | 4.39351000  | 0.81883000  | -0.81133700 |
| C  | 4.00940200  | 1.04943200  | 1.36285100  |
| C  | 5.35382200  | 1.77429600  | -0.30755800 |
| C  | 5.11798300  | 1.91517000  | 1.03201000  |
| H  | 6.10497100  | 2.26412300  | -0.91001600 |
| H  | 5.63594800  | 2.54510700  | 1.74039200  |
| N  | 1.66782800  | -0.67795500 | 2.05688700  |
| C  | 1.84892300  | -0.05147100 | 4.28502900  |
| H  | 2.21821700  | 0.46212500  | 5.16098900  |
| C  | 2.37160100  | 0.12810100  | 2.95135800  |
| C  | -0.12655900 | -2.84216200 | 1.04162900  |
| C  | 0.24011800  | -3.05204300 | -1.14137500 |
| C  | 3.36856000  | -0.47746900 | -2.63314900 |
| C  | 3.44988600  | 0.93511700  | 2.62784700  |
| H  | 3.89751100  | 1.51641500  | 3.42629300  |
| C  | -0.07774700 | -2.39914400 | 2.35602200  |
| H  | -0.73849100 | -2.87905100 | 3.06984300  |
| C  | 0.73970000  | -2.87275400 | -2.42296800 |
| H  | 0.30911700  | -3.47373000 | -3.21613000 |
| C  | 4.29242900  | 0.42893700  | -2.13854000 |
| H  | 4.99365600  | 0.86429500  | -2.84223200 |
| C  | 0.85932000  | -0.99369800 | 4.21021100  |
| H  | 0.26343400  | -1.40282200 | 5.01349100  |
| C  | 0.76156400  | -1.40240900 | 2.82909400  |
| C  | 0.41775700  | 3.70249800  | -0.76858800 |
| H  | 1.34086400  | 4.26609100  | -0.85793400 |
| C  | -1.66436400 | 1.46467500  | 0.21209000  |
| C  | -2.11579900 | 0.05875500  | -0.29133900 |
| H  | -1.90047500 | 2.18452400  | -0.57314400 |
| H  | -1.65431000 | -0.70034600 | 0.35093900  |
| Cl | -0.03291500 | 3.10958800  | -2.44502000 |
| Cl | -0.86201600 | 4.98219200  | -0.18267100 |
| C  | 0.58796800  | 2.71499900  | 0.37305500  |
| O  | 1.34242400  | 2.99250000  | 1.30001200  |
| N  | -0.14169500 | 1.43633500  | 0.39284300  |
| C  | -2.23378500 | 1.92347600  | 1.55233500  |
| H  | -3.32683300 | 1.90980600  | 1.51129200  |
| H  | -1.90643800 | 2.94500300  | 1.78266000  |
| O  | -1.72185700 | 0.97381700  | 2.53506100  |
| H  | -1.85222200 | 1.27947600  | 3.45244700  |
| O  | -1.67976000 | -0.08613800 | -1.65790600 |
| H  | -0.69443500 | 0.04777500  | -1.65006200 |
| C  | -3.62275500 | -0.10682400 | -0.25415700 |



|                            |             |             |             |
|----------------------------|-------------|-------------|-------------|
| C                          | -4.26582400 | -0.52807100 | 0.92465700  |
| C                          | -4.38501500 | 0.14511500  | -1.40672100 |
| C                          | -5.65120800 | -0.68098200 | 0.96137800  |
| H                          | -3.67409600 | -0.73501100 | 1.81041300  |
| C                          | -5.77206100 | -0.00472800 | -1.38359000 |
| H                          | -3.87253100 | 0.42889500  | -2.31660800 |
| C                          | -6.38627000 | -0.41193900 | -0.19664300 |
| H                          | -6.16539500 | -1.00775100 | 1.85549400  |
| H                          | -6.37761200 | 0.18183000  | -2.26067200 |
| N                          | -7.84217500 | -0.56816500 | -0.16395000 |
| O                          | -8.49251400 | -0.32336100 | -1.22054300 |
| O                          | -8.37762300 | -0.93727800 | 0.92176800  |
| H                          | 0.05314000  | 0.96866700  | 1.29947600  |
| <b><sup>2</sup>TS-rebo</b> |             |             |             |
| Fe                         | 2.37182800  | -1.21141000 | 0.07965700  |
| O                          | -0.03333100 | 0.62074300  | -0.65858200 |
| S                          | 4.05347700  | -2.82042600 | 0.43509000  |
| H                          | 3.55613600  | -3.38467600 | 1.59505000  |
| N                          | 1.06519700  | -2.33960500 | -1.08901500 |
| C                          | -0.50252300 | -3.91139100 | -1.74196000 |
| C                          | 0.15993300  | -3.50736400 | -2.86855700 |
| H                          | -1.29956800 | -4.63643300 | -1.66304900 |
| H                          | 0.00666000  | -3.83853300 | -3.88532300 |
| N                          | 3.24731200  | -0.52039300 | -1.59531600 |
| C                          | 3.06756100  | -1.01569200 | -2.88175700 |
| C                          | 4.01315500  | -0.37452400 | -3.77424100 |
| C                          | 4.74606200  | 0.50555700  | -3.03058100 |
| H                          | 4.08332800  | -0.57189500 | -4.83387500 |
| H                          | 5.53130000  | 1.16811600  | -3.36381700 |
| N                          | 3.21516600  | 0.38645900  | 1.14738900  |
| C                          | 4.22929600  | 1.21357700  | 0.68851000  |
| C                          | 3.11270000  | 0.60488600  | 2.51381900  |
| C                          | 4.73913300  | 2.00812600  | 1.78741300  |
| C                          | 4.05076700  | 1.63516700  | 2.91018400  |
| H                          | 5.52585400  | 2.74340800  | 1.70344600  |
| H                          | 4.17206200  | 2.00602900  | 3.91757800  |
| N                          | 1.27599800  | -1.67268300 | 1.71240400  |
| C                          | 0.58377300  | -1.89399600 | 3.90960100  |
| H                          | 0.53741900  | -1.72501600 | 4.97624100  |
| C                          | 1.45396700  | -1.17578900 | 3.00245200  |
| C                          | 0.07534300  | -3.18775700 | -0.62487300 |
| C                          | 1.15242100  | -2.53360600 | -2.45433300 |
| C                          | 4.26463400  | 0.42536100  | -1.66572500 |
| C                          | 2.29015800  | -0.12294900 | 3.36772300  |
| H                          | 2.31115900  | 0.14178300  | 4.42002200  |
| C                          | -0.25680200 | -3.35162500 | 0.71530500  |

|                            |             |             |             |
|----------------------------|-------------|-------------|-------------|
| H                          | -1.03215600 | -4.07378900 | 0.94909400  |
| C                          | 2.09644700  | -1.92852700 | -3.27913900 |
| H                          | 2.07407300  | -2.18993500 | -4.33190500 |
| C                          | 4.71122900  | 1.22449300  | -0.61804700 |
| H                          | 5.51123500  | 1.92189600  | -0.84283200 |
| C                          | -0.11773000 | -2.80873900 | 3.16676600  |
| H                          | -0.85691900 | -3.51854300 | 3.50953000  |
| C                          | 0.30070800  | -2.66339000 | 1.78995300  |
| C                          | 1.08972800  | 3.10038400  | -0.30397700 |
| H                          | 1.71108800  | 2.21341500  | -0.33935700 |
| C                          | -2.24085400 | 1.43083100  | 0.55576900  |
| C                          | -2.77532700 | 0.44412300  | -0.52384500 |
| H                          | -2.69109400 | 2.41231900  | 0.38340900  |
| H                          | -2.28815500 | -0.52274300 | -0.36976000 |
| Cl                         | 0.63505300  | 3.48613600  | -2.08320400 |
| Cl                         | 2.07199200  | 4.47884900  | 0.42230800  |
| C                          | -0.20996300 | 2.90597500  | 0.45068900  |
| O                          | -0.79936000 | 3.78434200  | 1.08299300  |
| N                          | -0.75547100 | 1.59521900  | 0.38189200  |
| C                          | -2.47000000 | 0.98927400  | 1.99949100  |
| H                          | -3.54350400 | 0.92985400  | 2.20794800  |
| H                          | -2.01661600 | 1.71572600  | 2.68325600  |
| O                          | -1.84251500 | -0.31899000 | 2.10490500  |
| H                          | -1.56561100 | -0.55317500 | 3.01178600  |
| O                          | -2.45019400 | 0.97842300  | -1.82544700 |
| H                          | -1.47867700 | 0.86227500  | -1.94485900 |
| C                          | -4.27793300 | 0.27481500  | -0.43302200 |
| C                          | -4.83190600 | -0.65907400 | 0.46214800  |
| C                          | -5.12704700 | 1.03970800  | -1.24997200 |
| C                          | -6.21376400 | -0.81975300 | 0.55504900  |
| H                          | -4.17294100 | -1.26086400 | 1.08006500  |
| C                          | -6.51140200 | 0.88741300  | -1.16805400 |
| H                          | -4.68696900 | 1.72769800  | -1.96012400 |
| C                          | -7.03545400 | -0.03864000 | -0.26218900 |
| H                          | -6.66060000 | -1.53442400 | 1.23334700  |
| H                          | -7.18341300 | 1.46395300  | -1.78992100 |
| N                          | -8.48751000 | -0.20337000 | -0.17016800 |
| O                          | -9.21797700 | 0.50715200  | -0.91926700 |
| O                          | -8.94060400 | -1.04778900 | 0.65679800  |
| H                          | -0.13788700 | 0.63059500  | 0.64766200  |
| <b><sup>4</sup>TS-rebo</b> |             |             |             |
| Fe                         | 2.37182800  | -1.21141000 | 0.07965700  |
| O                          | -0.03333100 | 0.62074300  | -0.65858200 |
| S                          | 4.05347700  | -2.82042600 | 0.43509000  |
| H                          | 3.55613600  | -3.38467600 | 1.59505000  |
| N                          | 1.06519700  | -2.33960500 | -1.08901500 |

|    |             |             |             |
|----|-------------|-------------|-------------|
| C  | -0.50252300 | -3.91139100 | -1.74196000 |
| C  | 0.15993300  | -3.50736400 | -2.86855700 |
| H  | -1.29956800 | -4.63643300 | -1.66304900 |
| H  | 0.00666000  | -3.83853300 | -3.88532300 |
| N  | 3.24731200  | -0.52039300 | -1.59531600 |
| C  | 3.06756100  | -1.01569200 | -2.88175700 |
| C  | 4.01315500  | -0.37452400 | -3.77424100 |
| C  | 4.74606200  | 0.50555700  | -3.03058100 |
| H  | 4.08332800  | -0.57189500 | -4.83387500 |
| H  | 5.53130000  | 1.16811600  | -3.36381700 |
| N  | 3.21516600  | 0.38645900  | 1.14738900  |
| C  | 4.22929600  | 1.21357700  | 0.68851000  |
| C  | 3.11270000  | 0.60488600  | 2.51381900  |
| C  | 4.73913300  | 2.00812600  | 1.78741300  |
| C  | 4.05076700  | 1.63516700  | 2.91018400  |
| H  | 5.52585400  | 2.74340800  | 1.70344600  |
| H  | 4.17206200  | 2.00602900  | 3.91757800  |
| N  | 1.27599800  | -1.67268300 | 1.71240400  |
| C  | 0.58377300  | -1.89399600 | 3.90960100  |
| H  | 0.53741900  | -1.72501600 | 4.97624100  |
| C  | 1.45396700  | -1.17578900 | 3.00245200  |
| C  | 0.07534300  | -3.18775700 | -0.62487300 |
| C  | 1.15242100  | -2.53360600 | -2.45433300 |
| C  | 4.26463400  | 0.42536100  | -1.66572500 |
| C  | 2.29015800  | -0.12294900 | 3.36772300  |
| H  | 2.31115900  | 0.14178300  | 4.42002200  |
| C  | -0.25680200 | -3.35162500 | 0.71530500  |
| H  | -1.03215600 | -4.07378900 | 0.94909400  |
| C  | 2.09644700  | -1.92852700 | -3.27913900 |
| H  | 2.07407300  | -2.18993500 | -4.33190500 |
| C  | 4.71122900  | 1.22449300  | -0.61804700 |
| H  | 5.51123500  | 1.92189600  | -0.84283200 |
| C  | -0.11773000 | -2.80873900 | 3.16676600  |
| H  | -0.85691900 | -3.51854300 | 3.50953000  |
| C  | 0.30070800  | -2.66339000 | 1.78995300  |
| C  | 1.08972800  | 3.10038400  | -0.30397700 |
| H  | 1.71108800  | 2.21341500  | -0.33935700 |
| C  | -2.24085400 | 1.43083100  | 0.55576900  |
| C  | -2.77532700 | 0.44412300  | -0.52384500 |
| H  | -2.69109400 | 2.41231900  | 0.38340900  |
| H  | -2.28815500 | -0.52274300 | -0.36976000 |
| Cl | 0.63505300  | 3.48613600  | -2.08320400 |
| Cl | 2.07199200  | 4.47884900  | 0.42230800  |
| C  | -0.20996300 | 2.90597500  | 0.45068900  |
| O  | -0.79936000 | 3.78434200  | 1.08299300  |
| N  | -0.75547100 | 1.59521900  | 0.38189200  |

|   |             |             |             |
|---|-------------|-------------|-------------|
| C | -2.47000000 | 0.98927400  | 1.99949100  |
| H | -3.54350400 | 0.92985400  | 2.20794800  |
| H | -2.01661600 | 1.71572600  | 2.68325600  |
| O | -1.84251500 | -0.31899000 | 2.10490500  |
| H | -1.56561100 | -0.55317500 | 3.01178600  |
| O | -2.45019400 | 0.97842300  | -1.82544700 |
| H | -1.47867700 | 0.86227500  | -1.94485900 |
| C | -4.27793300 | 0.27481500  | -0.43302200 |
| C | -4.83190600 | -0.65907400 | 0.46214800  |
| C | -5.12704700 | 1.03970800  | -1.24997200 |
| C | -6.21376400 | -0.81975300 | 0.55504900  |
| H | -4.17294100 | -1.26086400 | 1.08006500  |
| C | -6.51140200 | 0.88741300  | -1.16805400 |
| H | -4.68696900 | 1.72769800  | -1.96012400 |
| C | -7.03545400 | -0.03864000 | -0.26218900 |
| H | -6.66060000 | -1.53442400 | 1.23334700  |
| H | -7.18341300 | 1.46395300  | -1.78992100 |
| N | -8.48751000 | -0.20337000 | -0.17016800 |
| O | -9.21797700 | 0.50715200  | -0.91926700 |
| O | -8.94060400 | -1.04778900 | 0.65679800  |
| H | -0.13788700 | 0.63059500  | 0.64766200  |

### C-H hydroxylation through Path B

<sup>2</sup>RC<sub>1</sub>

|    |             |             |             |
|----|-------------|-------------|-------------|
| Fe | -3.56839400 | -0.18751500 | -0.03475100 |
| O  | -2.01840700 | -0.40902600 | 0.49509200  |
| S  | -5.98708300 | 0.45067000  | -0.64407400 |
| H  | -5.71009800 | 1.29107600  | -1.70633700 |
| N  | -3.00464100 | 0.15600400  | -1.93954200 |
| C  | -2.13029900 | 1.15903000  | -3.83904800 |
| C  | -2.27455800 | -0.16948400 | -4.11869700 |
| H  | -1.74589600 | 1.94213300  | -4.47524700 |
| H  | -2.03753200 | -0.69288900 | -5.03328300 |
| N  | -3.88247800 | -2.12449500 | -0.47637500 |
| C  | -3.58562200 | -2.76331400 | -1.66693500 |
| C  | -3.87467300 | -4.17646300 | -1.55786800 |
| C  | -4.34871000 | -4.38909100 | -0.29477800 |
| H  | -3.73075300 | -4.89546200 | -2.35092500 |
| H  | -4.67101000 | -5.31706600 | 0.15419600  |
| N  | -4.39444000 | -0.47302200 | 1.78478000  |
| C  | -4.79485500 | -1.68219000 | 2.33548800  |
| C  | -4.56198700 | 0.47263000  | 2.78267200  |
| C  | -5.22888900 | -1.48379500 | 3.70121000  |
| C  | -5.08194400 | -0.15540500 | 3.97817000  |
| H  | -5.59406100 | -2.26782200 | 4.34818900  |
| H  | -5.30391600 | 0.36686900  | 4.89715100  |

|    |             |             |             |
|----|-------------|-------------|-------------|
| N  | -3.53574600 | 1.80561100  | 0.31413400  |
| C  | -3.54493600 | 3.86149000  | 1.39506900  |
| H  | -3.69367900 | 4.58216100  | 2.18575400  |
| C  | -3.82243700 | 2.44723400  | 1.51469700  |
| C  | -2.58488900 | 1.35709100  | -2.48108000 |
| C  | -2.81343800 | -0.79487400 | -2.93094900 |
| C  | -4.35175600 | -3.10702800 | 0.37533300  |
| C  | -4.28605000 | 1.82651800  | 2.66094100  |
| H  | -4.45826500 | 2.45048600  | 3.53139800  |
| C  | -2.60607900 | 2.58352900  | -1.82982600 |
| H  | -2.22702600 | 3.44093500  | -2.37388600 |
| C  | -3.08992600 | -2.14673100 | -2.80702800 |
| H  | -2.89761000 | -2.77589900 | -3.66970000 |
| C  | -4.77690100 | -2.90229700 | 1.68150700  |
| H  | -5.12112400 | -3.76985600 | 2.23452500  |
| C  | -3.07365000 | 4.07528100  | 0.13217900  |
| H  | -2.75678700 | 5.00504200  | -0.31686200 |
| C  | -3.05470200 | 2.79505900  | -0.53936700 |
| C  | 0.95567500  | 0.24237600  | 0.31222900  |
| H  | -0.13131500 | 0.15391800  | 0.27737200  |
| C  | 3.93346900  | 1.14373800  | -0.06605900 |
| C  | 4.93944900  | 0.69808400  | -1.16560100 |
| H  | 3.65028700  | 0.26297600  | 0.51129200  |
| H  | 5.19571000  | 1.58360200  | -1.76083100 |
| Cl | 1.61466800  | -1.45961600 | -0.08483000 |
| Cl | 1.35816900  | 0.69184000  | 2.10509800  |
| C  | 1.43408100  | 1.32878700  | -0.64291800 |
| O  | 0.55865400  | 1.89729300  | -1.33596500 |
| N  | 2.73932700  | 1.70953800  | -0.69638800 |
| H  | 2.90864700  | 2.50178200  | -1.30596100 |
| C  | 4.54984100  | 2.18056000  | 0.87499300  |
| H  | 5.39563800  | 1.75136100  | 1.42389400  |
| H  | 3.78680600  | 2.50943900  | 1.58732400  |
| O  | 4.99595700  | 3.28850100  | 0.02711400  |
| H  | 5.17475200  | 4.08640600  | 0.56005300  |
| O  | 4.21645800  | -0.26711200 | -1.97637100 |
| H  | 4.72902100  | -0.48690900 | -2.78017300 |
| C  | 6.21402300  | 0.09710300  | -0.59630400 |
| C  | 7.35124500  | 0.89897100  | -0.38803300 |
| C  | 6.26502200  | -1.27103200 | -0.27492800 |
| C  | 8.52148400  | 0.34979200  | 0.13493500  |
| H  | 7.30704500  | 1.95666400  | -0.62639200 |
| C  | 7.42865900  | -1.83334100 | 0.24960200  |
| H  | 5.39028400  | -1.88569800 | -0.45233400 |
| C  | 8.54261800  | -1.01258500 | 0.44621000  |
| H  | 9.40793700  | 0.94795100  | 0.29948200  |

|                                   |             |             |             |
|-----------------------------------|-------------|-------------|-------------|
| H                                 | 7.48769200  | -2.88330200 | 0.50434900  |
| N                                 | 9.77007900  | -1.59642200 | 0.99146300  |
| O                                 | 9.77447500  | -2.83237500 | 1.25995300  |
| O                                 | 10.76515100 | -0.83470600 | 1.16764500  |
| <b><sup>4</sup>RC<sub>1</sub></b> |             |             |             |
| Fe                                | -3.57262900 | -0.17881300 | -0.03526200 |
| O                                 | -2.02264700 | -0.42287700 | 0.49178600  |
| S                                 | -5.98168200 | 0.40077800  | -0.66954800 |
| H                                 | -5.71303100 | 1.27259900  | -1.70823700 |
| N                                 | -2.99077700 | 0.17568300  | -1.93291500 |
| C                                 | -2.10921600 | 1.19382600  | -3.82114700 |
| C                                 | -2.24186200 | -0.13419200 | -4.10814700 |
| H                                 | -1.72543600 | 1.98268100  | -4.45055700 |
| H                                 | -1.99373400 | -0.65156700 | -5.02322000 |
| N                                 | -3.85843000 | -2.12358800 | -0.48749600 |
| C                                 | -3.54564800 | -2.75278400 | -1.67829600 |
| C                                 | -3.81223300 | -4.17118200 | -1.57567100 |
| C                                 | -4.28817700 | -4.39593600 | -0.31544500 |
| H                                 | -3.65234700 | -4.88502200 | -2.37032600 |
| H                                 | -4.59675600 | -5.33067000 | 0.12912900  |
| N                                 | -4.40649500 | -0.48519100 | 1.77671700  |
| C                                 | -4.79541400 | -1.70240100 | 2.31892100  |
| C                                 | -4.60139100 | 0.45437400  | 2.77498500  |
| C                                 | -5.24830900 | -1.51462900 | 3.68001500  |
| C                                 | -5.12566100 | -0.18488700 | 3.96246200  |
| H                                 | -5.60906100 | -2.30612200 | 4.32036200  |
| H                                 | -5.36692200 | 0.33116800  | 4.88008800  |
| N                                 | -3.56145100 | 1.80597000  | 0.32183700  |
| C                                 | -3.62494800 | 3.86090100  | 1.40341500  |
| H                                 | -3.79832900 | 4.57807300  | 2.19225000  |
| C                                 | -3.87813500 | 2.44195500  | 1.51849400  |
| C                                 | -2.57689000 | 1.38205700  | -2.46614000 |
| C                                 | -2.78562100 | -0.76948800 | -2.92760900 |
| C                                 | -4.31573400 | -3.11585900 | 0.35856100  |
| C                                 | -4.34516000 | 1.81270200  | 2.65854100  |
| H                                 | -4.53831000 | 2.43297600  | 3.52724500  |
| C                                 | -2.62001900 | 2.60530000  | -1.81019400 |
| H                                 | -2.24736700 | 3.47027800  | -2.34668600 |
| C                                 | -3.05161100 | -2.12407600 | -2.81280500 |
| H                                 | -2.84796600 | -2.74653400 | -3.67777300 |
| C                                 | -4.75349200 | -2.92042000 | 1.66209700  |
| H                                 | -5.08954500 | -3.79419100 | 2.21038000  |
| C                                 | -3.13991000 | 4.08432400  | 0.14745000  |
| H                                 | -2.83448400 | 5.02024700  | -0.29670600 |
| C                                 | -3.08834000 | 2.80557800  | -0.52488800 |
| C                                 | 0.95752900  | 0.22313600  | 0.31015700  |

|                                     |             |             |             |
|-------------------------------------|-------------|-------------|-------------|
| H                                   | -0.12905200 | 0.13255400  | 0.27332900  |
| C                                   | 3.93201500  | 1.14344900  | -0.05065000 |
| C                                   | 4.94133000  | 0.71392600  | -1.15357000 |
| H                                   | 3.65183400  | 0.25527600  | 0.51678000  |
| H                                   | 5.19366100  | 1.60663900  | -1.73963100 |
| Cl                                  | 1.62118900  | -1.47118800 | -0.11088500 |
| Cl                                  | 1.35756900  | 0.64808100  | 2.10933400  |
| C                                   | 1.43278600  | 1.32392200  | -0.63003900 |
| O                                   | 0.55589600  | 1.89701200  | -1.31737800 |
| N                                   | 2.73634700  | 1.71120300  | -0.67632400 |
| H                                   | 2.90305600  | 2.51207800  | -1.27528000 |
| C                                   | 4.54273800  | 2.17286300  | 0.90211200  |
| H                                   | 5.39000700  | 1.74173200  | 1.44718400  |
| H                                   | 3.77762900  | 2.49079600  | 1.61717100  |
| O                                   | 4.98453700  | 3.29178300  | 0.06643700  |
| H                                   | 5.15875700  | 4.08494500  | 0.60790000  |
| O                                   | 4.22392000  | -0.24666700 | -1.97466000 |
| H                                   | 4.73828600  | -0.45585100 | -2.78013500 |
| C                                   | 6.21834100  | 0.11373700  | -0.58889800 |
| C                                   | 7.35147300  | 0.91914400  | -0.37209300 |
| C                                   | 6.27573200  | -1.25705500 | -0.28017700 |
| C                                   | 8.52387800  | 0.37085200  | 0.14694300  |
| H                                   | 7.30234200  | 1.97880100  | -0.60053000 |
| C                                   | 7.44156000  | -1.81850200 | 0.24042300  |
| H                                   | 5.40426000  | -1.87441300 | -0.46420900 |
| C                                   | 8.55130800  | -0.99419400 | 0.44574800  |
| H                                   | 9.40725700  | 0.97176700  | 0.31786200  |
| H                                   | 7.50542500  | -2.87044800 | 0.48563000  |
| N                                   | 9.78100100  | -1.57704800 | 0.98706100  |
| O                                   | 9.79090100  | -2.81526000 | 1.24474000  |
| O                                   | 10.77230800 | -0.81225700 | 1.17087800  |
| <b><sup>2</sup>TS-H<sub>1</sub></b> |             |             |             |
| Fe                                  | -2.18263000 | -0.92094300 | 0.19822400  |
| O                                   | -0.88274000 | 0.05644300  | -0.46957400 |
| S                                   | -3.89758000 | -2.40152200 | 1.12327900  |
| H                                   | -3.96692000 | -3.27863800 | 0.05842400  |
| N                                   | -3.33042900 | 0.62092200  | 0.75719700  |
| C                                   | -4.21018500 | 2.41857700  | 1.92670600  |
| C                                   | -4.94944900 | 2.27838600  | 0.78866000  |
| H                                   | -4.31701400 | 3.15310800  | 2.71053300  |
| H                                   | -5.78227300 | 2.87773600  | 0.45239900  |
| N                                   | -3.16407500 | -1.02900900 | -1.55002400 |
| C                                   | -4.22819500 | -0.24097000 | -1.95585000 |
| C                                   | -4.59918300 | -0.58260000 | -3.31143000 |
| C                                   | -3.74569000 | -1.56437400 | -3.72727900 |
| H                                   | -5.40119600 | -0.11419700 | -3.86241500 |

|    |             |             |             |
|----|-------------|-------------|-------------|
| H  | -3.71431000 | -2.06408600 | -4.68424200 |
| N  | -1.16845600 | -2.59402600 | -0.28172100 |
| C  | -1.12005200 | -3.20154900 | -1.52679800 |
| C  | -0.30351600 | -3.30896300 | 0.53449800  |
| C  | -0.20147200 | -4.31783000 | -1.48957100 |
| C  | 0.29086100  | -4.39213700 | -0.21749200 |
| H  | 0.01890600  | -4.95760700 | -2.33137800 |
| H  | 0.99865300  | -5.10114200 | 0.18618100  |
| N  | -1.35201400 | -0.94866100 | 2.04035600  |
| C  | -0.05828300 | -1.51905200 | 3.87371200  |
| H  | 0.60190300  | -2.10228300 | 4.49961400  |
| C  | -0.47867400 | -1.90123400 | 2.54350700  |
| C  | -3.21083600 | 1.37390200  | 1.91684300  |
| C  | -4.39266200 | 1.16542400  | 0.05259700  |
| C  | -2.85478900 | -1.85073400 | -2.62411800 |
| C  | -0.00617700 | -3.00810400 | 1.85369600  |
| H  | 0.68326000  | -3.66475900 | 2.37308500  |
| C  | -2.32278600 | 1.12577500  | 2.94939900  |
| H  | -2.32570800 | 1.81155700  | 3.78873800  |
| C  | -4.82007700 | 0.76011400  | -1.20141300 |
| H  | -5.65352800 | 1.29459500  | -1.64303000 |
| C  | -1.88508900 | -2.84072800 | -2.62595100 |
| H  | -1.74818900 | -3.40747100 | -3.54022400 |
| C  | -0.66757400 | -0.32479600 | 4.16149100  |
| H  | -0.60643300 | 0.25682500  | 5.06997900  |
| C  | -1.48376200 | 0.02152500  | 3.01964900  |
| C  | -0.52759300 | 2.48973200  | -1.14683200 |
| H  | -0.82422700 | 1.11561200  | -0.85047200 |
| C  | 2.08522100  | 1.59153500  | 0.33415400  |
| C  | 3.49247800  | 2.24395100  | 0.39771100  |
| H  | 1.89728100  | 1.28587000  | -0.69378200 |
| H  | 3.62892100  | 2.63766800  | 1.41381600  |
| Cl | -2.10080700 | 3.21781400  | -1.72274100 |
| Cl | 0.68634600  | 2.48871400  | -2.53943500 |
| C  | -0.07423700 | 3.03270200  | 0.19395400  |
| O  | -0.83014600 | 3.80370200  | 0.83233300  |
| N  | 1.08600000  | 2.58170600  | 0.75164100  |
| H  | 1.21292200  | 2.91651400  | 1.70084700  |
| C  | 1.96351400  | 0.36193700  | 1.23368600  |
| H  | 2.67511000  | -0.41388900 | 0.93037000  |
| H  | 0.94836600  | -0.02530700 | 1.13395600  |
| O  | 2.24749800  | 0.79419700  | 2.60484700  |
| H  | 1.70236300  | 0.28333400  | 3.23600800  |
| O  | 3.45572900  | 3.33146800  | -0.56806900 |
| H  | 4.22635600  | 3.92123400  | -0.44421800 |
| C  | 4.62283400  | 1.27445900  | 0.09245200  |



|                                      |             |             |             |
|--------------------------------------|-------------|-------------|-------------|
| C                                    | 5.23606600  | 0.54789100  | 1.13018300  |
| C                                    | 5.06405900  | 1.09565900  | -1.23021000 |
| C                                    | 6.26984000  | -0.34608800 | 0.85563700  |
| H                                    | 4.88076800  | 0.67355600  | 2.14785200  |
| C                                    | 6.09667200  | 0.20369000  | -1.51941500 |
| H                                    | 4.59680700  | 1.67052500  | -2.02090500 |
| C                                    | 6.68632900  | -0.50564300 | -0.46949100 |
| H                                    | 6.75552200  | -0.91279900 | 1.63897500  |
| H                                    | 6.44907600  | 0.05057800  | -2.53093300 |
| N                                    | 7.77063300  | -1.44328500 | -0.76438700 |
| O                                    | 8.13894100  | -1.57152200 | -1.96811700 |
| O                                    | 8.28595700  | -2.08239800 | 0.19907400  |
| <b><sup>4</sup>TS- H<sub>1</sub></b> |             |             |             |
| Fe                                   | 2.16229000  | 0.97399800  | 0.18623900  |
| O                                    | 0.88547600  | -0.00870300 | -0.51572100 |
| S                                    | 3.94226100  | 2.18121800  | 1.26105100  |
| H                                    | 4.88805800  | 2.08944900  | 0.25844100  |
| N                                    | 3.28016500  | -0.66217200 | 0.67484300  |
| C                                    | 4.12865300  | -2.50516000 | 1.80051300  |
| C                                    | 4.83718700  | -2.38235500 | 0.64257800  |
| H                                    | 4.22837700  | -3.25245200 | 2.57296900  |
| H                                    | 5.63511200  | -3.01018300 | 0.27500300  |
| N                                    | 3.15164600  | 1.08572700  | -1.56301600 |
| C                                    | 4.15437600  | 0.24479500  | -2.02495800 |
| C                                    | 4.51785300  | 0.61301600  | -3.37470800 |
| C                                    | 3.71816100  | 1.66106200  | -3.73465600 |
| H                                    | 5.27565400  | 0.11580900  | -3.96199100 |
| H                                    | 3.69568400  | 2.19515600  | -4.67311000 |
| N                                    | 1.15293400  | 2.63729400  | -0.25346400 |
| C                                    | 1.14647200  | 3.30192500  | -1.46936500 |
| C                                    | 0.31344300  | 3.35681900  | 0.58172000  |
| C                                    | 0.26034000  | 4.44595800  | -1.40058100 |
| C                                    | -0.24366400 | 4.48674000  | -0.13356400 |
| H                                    | 0.07382600  | 5.12614800  | -2.21855000 |
| H                                    | -0.92947700 | 5.20413200  | 0.29263800  |
| N                                    | 1.36195400  | 0.96610900  | 2.02621800  |
| C                                    | 0.10566200  | 1.51082200  | 3.89422400  |
| H                                    | -0.53663800 | 2.08753500  | 4.54437400  |
| C                                    | 0.50571400  | 1.91486100  | 2.56578000  |
| C                                    | 3.16712300  | -1.42243000 | 1.82717900  |
| C                                    | 4.29930600  | -1.23926100 | -0.06583800 |
| C                                    | 2.86738400  | 1.95446400  | -2.60324500 |
| C                                    | 0.03362100  | 3.03928600  | 1.90083400  |
| H                                    | -0.63436300 | 3.69858300  | 2.44460900  |
| C                                    | 2.30790300  | -1.15350000 | 2.87960200  |
| H                                    | 2.30537300  | -1.84984500 | 3.71052200  |

|                                    |             |             |             |
|------------------------------------|-------------|-------------|-------------|
| C                                  | 4.70728800  | -0.81646600 | -1.32051900 |
| H                                  | 5.49788400  | -1.37848300 | -1.80531100 |
| C                                  | 1.92522100  | 2.97347400  | -2.56668700 |
| H                                  | 1.81535000  | 3.58217500  | -3.45768300 |
| C                                  | 0.70754800  | 0.30401900  | 4.14651600  |
| H                                  | 0.65289600  | -0.29624100 | 5.04318700  |
| C                                  | 1.49859000  | -0.02990800 | 2.98505200  |
| C                                  | 0.56443400  | -2.49324300 | -1.10893600 |
| H                                  | 0.89618500  | -1.07689800 | -0.81970400 |
| C                                  | -2.06324000 | -1.53793100 | 0.36082300  |
| C                                  | -3.45862300 | -2.21721900 | 0.41950000  |
| H                                  | -1.87229900 | -1.23658300 | -0.66722600 |
| H                                  | -3.59541500 | -2.60382700 | 1.43824900  |
| Cl                                 | 2.07622600  | -3.32402100 | -1.70345400 |
| Cl                                 | -0.65315800 | -2.40052300 | -2.49527000 |
| C                                  | 0.09712300  | -2.99176400 | 0.24102200  |
| O                                  | 0.84090500  | -3.76027700 | 0.89830800  |
| N                                  | -1.04935000 | -2.50364900 | 0.79797100  |
| H                                  | -1.16893500 | -2.81070300 | 1.75763600  |
| C                                  | -1.97237500 | -0.29908700 | 1.25057400  |
| H                                  | -2.70231800 | 0.45693700  | 0.94152500  |
| H                                  | -0.96700100 | 0.11210800  | 1.14900500  |
| O                                  | -2.24709100 | -0.72654900 | 2.62517000  |
| H                                  | -1.69927700 | -0.21311800 | 3.25183100  |
| O                                  | -3.39088700 | -3.31291900 | -0.53527500 |
| H                                  | -4.14828500 | -3.91935100 | -0.41066000 |
| C                                  | -4.60527600 | -1.27395000 | 0.09497400  |
| C                                  | -5.24520600 | -0.55347200 | 1.12078300  |
| C                                  | -5.03486000 | -1.11259400 | -1.23380300 |
| C                                  | -6.29351500 | 0.31773400  | 0.82860000  |
| H                                  | -4.90057400 | -0.66612400 | 2.14367600  |
| C                                  | -6.08185400 | -0.24362500 | -1.54064100 |
| H                                  | -4.54708700 | -1.68307600 | -2.01523400 |
| C                                  | -6.69773300 | 0.46041400  | -0.50221900 |
| H                                  | -6.79964600 | 0.87935700  | 1.60259500  |
| H                                  | -6.42561300 | -0.10419900 | -2.55709800 |
| N                                  | -7.79757200 | 1.37361100  | -0.81560200 |
| O                                  | -8.15506300 | 1.48601400  | -2.02416800 |
| O                                  | -8.33660800 | 2.00849900  | 0.13763500  |
| <b><sup>2</sup>INT<sub>1</sub></b> |             |             |             |
| Fe                                 | -3.51180888 | 0.14208129  | 0.04875650  |
| O                                  | -1.96182688 | 0.38614529  | -0.47829150 |
| S                                  | -5.98168200 | -0.40077800 | 0.66954800  |
| H                                  | -5.71303100 | -1.27259900 | 1.70823700  |
| N                                  | -2.99077700 | -0.17568300 | 1.93291500  |
| C                                  | -2.10921600 | -1.19382600 | 3.82114700  |

|    |             |             |             |
|----|-------------|-------------|-------------|
| C  | -2.24186200 | 0.13419200  | 4.10814700  |
| H  | -1.72543600 | -1.98268100 | 4.45055700  |
| H  | -1.99373400 | 0.65156700  | 5.02322000  |
| N  | -3.85843000 | 2.12358800  | 0.48749600  |
| C  | -3.54564800 | 2.75278400  | 1.67829600  |
| C  | -3.81223300 | 4.17118200  | 1.57567100  |
| C  | -4.28817700 | 4.39593600  | 0.31544500  |
| H  | -3.65234700 | 4.88502200  | 2.37032600  |
| H  | -4.59675600 | 5.33067000  | -0.12912900 |
| N  | -4.40649500 | 0.48519100  | -1.77671700 |
| C  | -4.79541400 | 1.70240100  | -2.31892100 |
| C  | -4.60139100 | -0.45437400 | -2.77498500 |
| C  | -5.24830900 | 1.51462900  | -3.68001500 |
| C  | -5.12566100 | 0.18488700  | -3.96246200 |
| H  | -5.60906100 | 2.30612200  | -4.32036200 |
| H  | -5.36692200 | -0.33116800 | -4.88008800 |
| N  | -3.56145100 | -1.80597000 | -0.32183700 |
| C  | -3.62494800 | -3.86090100 | -1.40341500 |
| H  | -3.79832900 | -4.57807300 | -2.19225000 |
| C  | -3.87813500 | -2.44195500 | -1.51849400 |
| C  | -2.57689000 | -1.38205700 | 2.46614000  |
| C  | -2.78562100 | 0.76948800  | 2.92760900  |
| C  | -4.31573400 | 3.11585900  | -0.35856100 |
| C  | -4.34516000 | -1.81270200 | -2.65854100 |
| H  | -4.53831000 | -2.43297600 | -3.52724500 |
| C  | -2.62001900 | -2.60530000 | 1.81019400  |
| H  | -2.24736700 | -3.47027800 | 2.34668600  |
| C  | -3.05161100 | 2.12407600  | 2.81280500  |
| H  | -2.84796600 | 2.74653400  | 3.67777300  |
| C  | -4.75349200 | 2.92042000  | -1.66209700 |
| H  | -5.08954500 | 3.79419100  | -2.21038000 |
| C  | -3.13991000 | -4.08432400 | -0.14745000 |
| H  | -2.83448400 | -5.02024700 | 0.29670600  |
| C  | -3.08834000 | -2.80557800 | 0.52488800  |
| C  | 1.25826768  | -0.42838573 | -0.14636238 |
| H  | -1.12926847 | -0.11667013 | -0.29356703 |
| C  | 4.23275368  | -1.34869873 | 0.21444462  |
| C  | 5.24206868  | -0.91917573 | 1.31736462  |
| H  | 3.95257268  | -0.46052573 | -0.35298538 |
| H  | 5.49439968  | -1.81188873 | 1.90342562  |
| Cl | 1.92192768  | 1.26593827  | 0.27467962  |
| Cl | 1.65830768  | -0.85333073 | -1.94553938 |
| C  | 1.73352468  | -1.52917173 | 0.79383362  |
| O  | 0.85663468  | -2.10226173 | 1.48117262  |
| N  | 3.03708568  | -1.91645273 | 0.84011862  |
| H  | 3.20379468  | -2.71732773 | 1.43907462  |

|                                    |             |             |             |
|------------------------------------|-------------|-------------|-------------|
| C                                  | 4.84347668  | -2.37811273 | -0.73831738 |
| H                                  | 5.69074568  | -1.94698173 | -1.28338938 |
| H                                  | 4.07836768  | -2.69604573 | -1.45337638 |
| O                                  | 5.28527568  | -3.49703273 | 0.09735762  |
| H                                  | 5.45949568  | -4.29019473 | -0.44410538 |
| O                                  | 4.52465868  | 0.04141727  | 2.13845462  |
| H                                  | 5.03902468  | 0.25060127  | 2.94392962  |
| C                                  | 6.51907968  | -0.31898673 | 0.75269262  |
| C                                  | 7.65221168  | -1.12439373 | 0.53588762  |
| C                                  | 6.57647068  | 1.05180527  | 0.44397162  |
| C                                  | 8.82461668  | -0.57610173 | 0.01685162  |
| H                                  | 7.60308068  | -2.18405073 | 0.76432462  |
| C                                  | 7.74229868  | 1.61325227  | -0.07662838 |
| H                                  | 5.70499868  | 1.66916327  | 0.62800362  |
| C                                  | 8.85204668  | 0.78894427  | -0.28195338 |
| H                                  | 9.70799568  | -1.17701673 | -0.15406738 |
| H                                  | 7.80616368  | 2.66519827  | -0.32183538 |
| N                                  | 10.08173968 | 1.37179827  | -0.82326638 |
| O                                  | 10.09163968 | 2.61001027  | -1.08094538 |
| O                                  | 11.07304668 | 0.60700727  | -1.00708338 |
| <b><sup>4</sup>INT<sub>1</sub></b> |             |             |             |
| Fe                                 | 2.16125900  | -1.09035900 | -0.04739700 |
| O                                  | 1.06271900  | 0.37152400  | -0.03695700 |
| S                                  | 3.64527200  | -2.91158100 | -0.12353200 |
| H                                  | 3.23458500  | -3.53570700 | 1.03821700  |
| N                                  | 1.20064800  | -1.94236700 | 1.50442700  |
| C                                  | 0.48829600  | -2.46385700 | 3.64488100  |
| C                                  | -0.33127800 | -3.12619800 | 2.77381600  |
| H                                  | 0.46074700  | -2.46698400 | 4.72473700  |
| H                                  | -1.16247600 | -3.77814600 | 2.99949500  |
| N                                  | 0.90777200  | -2.00593000 | -1.32306700 |
| C                                  | -0.14697300 | -2.84648700 | -1.00139900 |
| C                                  | -0.79971800 | -3.29354600 | -2.21216900 |
| C                                  | -0.13194200 | -2.73063900 | -3.26130400 |
| H                                  | -1.65537400 | -3.95214500 | -2.23700100 |
| H                                  | -0.32939900 | -2.83836700 | -4.31767300 |
| N                                  | 3.23779900  | -0.38811900 | -1.59068900 |
| C                                  | 2.95174800  | -0.54856400 | -2.93769000 |
| C                                  | 4.37129000  | 0.41029100  | -1.52222300 |
| C                                  | 3.93878600  | 0.14953700  | -3.72868000 |
| C                                  | 4.81373700  | 0.73592000  | -2.85845900 |
| H                                  | 3.94383800  | 0.18163900  | -4.80822300 |
| H                                  | 5.67619500  | 1.34575700  | -3.08370700 |
| N                                  | 3.40091300  | -0.14642200 | 1.24270700  |
| C                                  | 5.14470900  | 1.09205800  | 2.12802400  |
| H                                  | 6.02668200  | 1.71493100  | 2.15176400  |

|    |             |             |             |
|----|-------------|-------------|-------------|
| C  | 4.51452600  | 0.61529500  | 0.91827600  |
| C  | 1.43868700  | -1.71646600 | 2.85539500  |
| C  | 0.10226400  | -2.79001400 | 1.43782200  |
| C  | 0.94262500  | -1.93668000 | -2.70784300 |
| C  | 4.97089200  | 0.87332000  | -0.36294400 |
| H  | 5.85421400  | 1.49284500  | -0.46720000 |
| C  | 2.42492400  | -0.89737200 | 3.38068700  |
| H  | 2.49621000  | -0.82658700 | 4.46027100  |
| C  | -0.52157700 | -3.22033400 | 0.27743400  |
| H  | -1.37171900 | -3.88518600 | 0.37955800  |
| C  | 1.88267400  | -1.25697400 | -3.46170100 |
| H  | 1.78497700  | -1.29379400 | -4.54067600 |
| C  | 4.42144100  | 0.60550700  | 3.17968500  |
| H  | 4.59583300  | 0.74765900  | 4.23613100  |
| C  | 3.34088400  | -0.18052500 | 2.62833800  |
| C  | -0.53618100 | 4.20089500  | -0.50225200 |
| H  | 1.44050900  | 1.22279600  | 0.29807200  |
| C  | -2.31860700 | 2.21795900  | 1.11775600  |
| C  | -2.13285200 | 0.79537000  | 0.47610600  |
| H  | -2.80649000 | 2.84343300  | 0.36886900  |
| H  | -1.58626000 | 0.17686900  | 1.19784800  |
| Cl | 0.53217700  | 4.57414800  | -1.86238000 |
| Cl | -2.00801600 | 5.21745300  | -0.37658300 |
| C  | -0.07975100 | 3.29174900  | 0.54734900  |
| O  | 1.16209400  | 3.06395200  | 0.65811900  |
| N  | -0.98604100 | 2.76051500  | 1.42754600  |
| H  | -0.54825500 | 2.29645800  | 2.21926000  |
| C  | -3.14802100 | 2.24303400  | 2.39487700  |
| H  | -4.16065200 | 1.87319500  | 2.20268200  |
| H  | -3.20573800 | 3.27170800  | 2.77024600  |
| O  | -2.45378200 | 1.38026500  | 3.35328400  |
| H  | -2.82737800 | 1.47958900  | 4.24981800  |
| O  | -1.36206400 | 0.98354400  | -0.72104600 |
| H  | -0.41280800 | 0.65886900  | -0.58264000 |
| C  | -3.45427400 | 0.12485600  | 0.14823700  |
| C  | -4.15848400 | -0.58869800 | 1.13719400  |
| C  | -3.98434100 | 0.20541500  | -1.15081900 |
| C  | -5.37552900 | -1.20166800 | 0.84299600  |
| H  | -3.74153200 | -0.66163400 | 2.13679000  |
| C  | -5.20257300 | -0.39970500 | -1.45883300 |
| H  | -3.41198400 | 0.72252400  | -1.91029200 |
| C  | -5.88425300 | -1.09470000 | -0.45518300 |
| H  | -5.92850400 | -1.75903200 | 1.58761700  |
| H  | -5.62630100 | -0.34914300 | -2.45324100 |
| N  | -7.15891200 | -1.73686100 | -0.77162700 |
| O  | -7.60505100 | -1.63416300 | -1.95166100 |

|                                       |             |             |             |
|---------------------------------------|-------------|-------------|-------------|
| O                                     | -7.75751400 | -2.36543500 | 0.15090700  |
| <b><sup>2</sup>TS-reb<sub>1</sub></b> |             |             |             |
| Fe                                    | -2.77882300 | -0.28575900 | -0.57859400 |
| O                                     | -1.80458400 | 0.22751900  | 0.92683900  |
| S                                     | -4.04991600 | -0.81827600 | -2.51852600 |
| H                                     | -4.87820300 | 0.28719500  | -2.54399100 |
| N                                     | -1.34274200 | -1.45317300 | -1.32883900 |
| C                                     | 0.53189900  | -2.18974200 | -2.49015200 |
| C                                     | 0.02323600  | -3.26597500 | -1.82438500 |
| H                                     | 1.40699100  | -2.13953800 | -3.12010600 |
| H                                     | 0.39184200  | -4.28117700 | -1.81090200 |
| N                                     | -3.51594000 | -1.85730600 | 0.42302500  |
| C                                     | -3.02891300 | -3.14915700 | 0.44510100  |
| C                                     | -3.84345800 | -3.97551500 | 1.31272900  |
| C                                     | -4.82825300 | -3.17444200 | 1.81289100  |
| H                                     | -3.67165500 | -5.02518200 | 1.50066100  |
| H                                     | -5.62518200 | -3.43662500 | 2.49331600  |
| N                                     | -4.27925000 | 0.90359700  | 0.10850500  |
| C                                     | -5.27873700 | 0.51846900  | 0.98534800  |
| C                                     | -4.49962800 | 2.24869600  | -0.15275900 |
| C                                     | -6.14412000 | 1.64152200  | 1.27555100  |
| C                                     | -5.66270900 | 2.71009200  | 0.57257000  |
| H                                     | -7.00034100 | 1.60357400  | 1.93303000  |
| H                                     | -6.04563500 | 3.71963000  | 0.54210600  |
| N                                     | -2.08172300 | 1.30882700  | -1.63114400 |
| C                                     | -1.77746500 | 3.42430500  | -2.54147700 |
| H                                     | -1.96396900 | 4.46766700  | -2.74984800 |
| C                                     | -2.59295700 | 2.60031100  | -1.67574700 |
| C                                     | -0.32455800 | -1.06006100 | -2.18702700 |
| C                                     | -1.14146400 | -2.80428100 | -1.09758900 |
| C                                     | -4.62404600 | -1.85234900 | 1.25406800  |
| C                                     | -3.71435400 | 3.03615100  | -0.98643300 |
| H                                     | -3.99911100 | 4.07652700  | -1.10289800 |
| C                                     | -0.14099600 | 0.22030800  | -2.68811600 |
| H                                     | 0.71217500  | 0.37488700  | -3.34021500 |
| C                                     | -1.92435600 | -3.59371300 | -0.26910900 |
| H                                     | -1.65067300 | -4.63876700 | -0.16887100 |
| C                                     | -5.43493900 | -0.75812700 | 1.51301200  |
| H                                     | -6.27101800 | -0.91255500 | 2.18755900  |
| C                                     | -0.76979000 | 2.63241600  | -3.01378600 |
| H                                     | 0.02982900  | 2.89758700  | -3.69001900 |
| C                                     | -0.96265200 | 1.31503500  | -2.44420400 |
| C                                     | 0.10120400  | 0.26920200  | 2.24254700  |
| H                                     | -1.98847700 | 1.15691900  | 1.18916700  |
| C                                     | 2.90736900  | 1.25648600  | 1.05011400  |
| C                                     | 3.49680900  | 0.95630100  | -0.36267800 |

|                                       |             |             |             |
|---------------------------------------|-------------|-------------|-------------|
| H                                     | 2.87721900  | 0.32208100  | 1.61254400  |
| H                                     | 3.50020600  | 1.90037600  | -0.92354900 |
| Cl                                    | 0.84499200  | -1.27931400 | 1.73959300  |
| Cl                                    | -0.75730600 | 0.21781800  | 3.80594000  |
| C                                     | 0.41926900  | 1.58095900  | 1.67131900  |
| O                                     | -0.38239300 | 2.53485500  | 1.86329000  |
| N                                     | 1.52973900  | 1.76312800  | 0.85959400  |
| H                                     | 1.52165300  | 2.69636500  | 0.45173700  |
| C                                     | 3.72035000  | 2.28499200  | 1.83968500  |
| H                                     | 4.73131600  | 1.91036300  | 2.03605100  |
| H                                     | 3.22252400  | 2.48330100  | 2.79713000  |
| O                                     | 3.76403200  | 3.49007500  | 1.01405200  |
| H                                     | 4.05793100  | 4.26425900  | 1.53085400  |
| O                                     | 2.65824400  | -0.01755900 | -1.02852700 |
| H                                     | 1.71621600  | 0.19949200  | -0.86106600 |
| C                                     | 4.90675400  | 0.40576200  | -0.31763900 |
| C                                     | 6.00652700  | 1.28339500  | -0.28890300 |
| C                                     | 5.12987200  | -0.98148500 | -0.30352200 |
| C                                     | 7.30896500  | 0.78964400  | -0.22979800 |
| H                                     | 5.83314400  | 2.35451400  | -0.31183400 |
| C                                     | 6.42780000  | -1.48894200 | -0.24554200 |
| H                                     | 4.27877400  | -1.64735200 | -0.36391500 |
| C                                     | 7.50081900  | -0.59452900 | -0.20586900 |
| H                                     | 8.16748400  | 1.44780200  | -0.20983800 |
| H                                     | 6.62126600  | -2.55346900 | -0.23554200 |
| N                                     | 8.86522700  | -1.12090800 | -0.14449800 |
| O                                     | 9.02082000  | -2.37634600 | -0.12953400 |
| O                                     | 9.82275900  | -0.29402200 | -0.10655100 |
| <b><sup>4</sup>TS-reb<sub>1</sub></b> |             |             |             |
| Fe                                    | -2.73763000 | -0.32224900 | -0.63156600 |
| O                                     | -1.58774300 | 0.31462100  | 0.75851400  |
| S                                     | -4.11251500 | -1.05894200 | -2.43268700 |
| H                                     | -4.85186300 | -2.00271800 | -1.74610200 |
| N                                     | -1.27988200 | -1.60169300 | -1.17931100 |
| C                                     | 0.59356200  | -2.51579600 | -2.18907700 |
| C                                     | 0.04907000  | -3.48547700 | -1.39719000 |
| H                                     | 1.47660600  | -2.56812300 | -2.80798000 |
| H                                     | 0.39469300  | -4.49692100 | -1.24109800 |
| N                                     | -3.51664500 | -1.73190600 | 0.57282000  |
| C                                     | -3.04945600 | -3.02784800 | 0.74739400  |
| C                                     | -3.85440700 | -3.70362600 | 1.73822600  |
| C                                     | -4.78796100 | -2.80845400 | 2.18074900  |
| H                                     | -3.70227000 | -4.72485600 | 2.05552800  |
| H                                     | -5.55285100 | -2.95320600 | 2.92958600  |
| N                                     | -4.13647000 | 0.99008800  | -0.00781300 |
| C                                     | -5.12298900 | 0.76171300  | 0.94452800  |

|    |             |             |             |
|----|-------------|-------------|-------------|
| C  | -4.37408000 | 2.26208400  | -0.51654600 |
| C  | -5.96594000 | 1.92945400  | 1.05851800  |
| C  | -5.50916300 | 2.84890400  | 0.15683700  |
| H  | -6.80289200 | 2.01435600  | 1.73599200  |
| H  | -5.89636600 | 3.83620500  | -0.04775600 |
| N  | -2.03488200 | 1.05113000  | -1.91774300 |
| C  | -1.74514000 | 2.98963100  | -3.14859400 |
| H  | -1.93701600 | 3.98625300  | -3.51820200 |
| C  | -2.55438300 | 2.31544200  | -2.16069800 |
| C  | -0.24768600 | -1.34439500 | -2.06581600 |
| C  | -1.12237300 | -2.91409800 | -0.76719800 |
| C  | -4.57301700 | -1.57531400 | 1.45994000  |
| C  | -3.64660900 | 2.87843800  | -1.52002000 |
| H  | -3.94177600 | 3.87920300  | -1.81404800 |
| C  | -0.06300700 | -0.16795000 | -2.77469500 |
| H  | 0.79567900  | -0.10973500 | -3.43301200 |
| C  | -1.94972000 | -3.58669200 | 0.11594100  |
| H  | -1.70548400 | -4.61663100 | 0.35068700  |
| C  | -5.31692200 | -0.41971800 | 1.64006300  |
| H  | -6.12408700 | -0.45010700 | 2.36326000  |
| C  | -0.72743400 | 2.14114400  | -3.48574800 |
| H  | 0.07568400  | 2.30394600  | -4.18955400 |
| C  | -0.90662600 | 0.93106100  | -2.71748400 |
| C  | 0.01594800  | 0.41415500  | 2.25230200  |
| H  | -1.94560600 | 1.17623500  | 1.07778800  |
| C  | 2.90348600  | 1.39869100  | 1.17026900  |
| C  | 3.43708500  | 1.10808200  | -0.26827200 |
| H  | 2.85250000  | 0.45480700  | 1.71282400  |
| H  | 3.46329900  | 2.06471100  | -0.80675500 |
| Cl | 0.86487800  | -1.11624100 | 1.86060500  |
| Cl | -0.95282800 | 0.34434500  | 3.76060800  |
| C  | 0.39100100  | 1.75120800  | 1.75878300  |
| O  | -0.43327900 | 2.69028100  | 1.92320700  |
| N  | 1.54927000  | 1.97473700  | 1.03888900  |
| H  | 1.57292500  | 2.92891000  | 0.68434600  |
| C  | 3.78276800  | 2.37367300  | 1.95654500  |
| H  | 4.78674500  | 1.95871900  | 2.09971100  |
| H  | 3.33010900  | 2.55893800  | 2.93863700  |
| O  | 3.83568800  | 3.60178500  | 1.16590900  |
| H  | 4.18677300  | 4.34718100  | 1.68926500  |
| O  | 2.54420900  | 0.18278600  | -0.93186800 |
| H  | 1.61378200  | 0.45633900  | -0.78722800 |
| C  | 4.82268500  | 0.49725600  | -0.27931900 |
| C  | 5.96034600  | 1.32545000  | -0.26408000 |
| C  | 4.98507500  | -0.89839100 | -0.30497000 |
| C  | 7.24116300  | 0.77466300  | -0.25777900 |



|                                     |             |             |             |
|-------------------------------------|-------------|-------------|-------------|
| H                                   | 5.83400200  | 2.40338700  | -0.25784500 |
| C                                   | 6.26070000  | -1.46256500 | -0.30014200 |
| H                                   | 4.10434300  | -1.52551700 | -0.35424100 |
| C                                   | 7.37272700  | -0.61661300 | -0.27301100 |
| H                                   | 8.12792400  | 1.39447900  | -0.24949600 |
| H                                   | 6.40742600  | -2.53438900 | -0.32154000 |
| N                                   | 8.71406100  | -1.20250500 | -0.26738400 |
| O                                   | 8.81502800  | -2.46343200 | -0.28878700 |
| O                                   | 9.70748600  | -0.41871000 | -0.23855600 |
| <b><sup>2</sup>P-OH<sub>1</sub></b> |             |             |             |
| Fe                                  | -3.68739400 | 0.45556800  | -0.19539900 |
| S                                   | -5.62994100 | 1.38787700  | -1.11830400 |
| H                                   | -6.30286900 | 0.21908300  | -1.42052600 |
| N                                   | -4.21914400 | -1.46185100 | -0.44512600 |
| C                                   | -4.70362900 | -3.51263300 | -1.40491700 |
| C                                   | -5.22248500 | -3.52543900 | -0.14137800 |
| H                                   | -4.72353700 | -4.30084700 | -2.14314200 |
| H                                   | -5.74948700 | -4.32663000 | 0.35565700  |
| N                                   | -4.16086100 | 0.30942300  | 1.81565900  |
| C                                   | -4.81687700 | -0.74442100 | 2.42883000  |
| C                                   | -5.11548500 | -0.39490300 | 3.80235200  |
| C                                   | -4.66001200 | 0.87949800  | 4.00179000  |
| H                                   | -5.61498100 | -1.04232900 | 4.50821300  |
| H                                   | -4.71610000 | 1.47394900  | 4.90202600  |
| N                                   | -2.85806000 | 2.25429000  | 0.15142300  |
| C                                   | -3.00837700 | 3.01994700  | 1.30228100  |
| C                                   | -2.14967100 | 3.03532100  | -0.75730900 |
| C                                   | -2.41044500 | 4.32174000  | 1.09189600  |
| C                                   | -1.88670000 | 4.33179600  | -0.16915100 |
| H                                   | -2.38451800 | 5.10794500  | 1.83210400  |
| H                                   | -1.34829400 | 5.12758100  | -0.66252800 |
| N                                   | -2.47979500 | 0.29485000  | -1.93383900 |
| C                                   | -1.52258900 | 1.00409700  | -3.92241900 |
| H                                   | -1.01620300 | 1.64663800  | -4.62782700 |
| C                                   | -1.86377500 | 1.37581700  | -2.57329000 |
| C                                   | -4.05654800 | -2.23234100 | -1.59464200 |
| C                                   | -4.90820200 | -2.25190900 | 0.46984000  |
| C                                   | -4.07633900 | 1.32469200  | 2.75301900  |
| C                                   | -1.69692400 | 2.63416100  | -2.00873600 |
| H                                   | -1.17444300 | 3.37709400  | -2.60171300 |
| C                                   | -3.33236900 | -1.87948500 | -2.72814700 |
| H                                   | -3.33077500 | -2.58959000 | -3.54825300 |
| C                                   | -5.18123300 | -1.92439800 | 1.79266200  |
| H                                   | -5.70978800 | -2.66567400 | 2.38236100  |
| C                                   | -3.56138900 | 2.59077500  | 2.50276700  |
| H                                   | -3.57857900 | 3.30532000  | 3.31875400  |

|                                     |             |             |             |
|-------------------------------------|-------------|-------------|-------------|
| C                                   | -1.98627000 | -0.27098600 | -4.12778700 |
| H                                   | -1.92667200 | -0.86053700 | -5.03095300 |
| C                                   | -2.61950000 | -0.70097200 | -2.90786700 |
| C                                   | 0.57598200  | -0.94317800 | -0.08358800 |
| C                                   | 3.64558900  | -1.47094900 | 0.57435000  |
| C                                   | 4.54371900  | -0.74701000 | 1.61983700  |
| H                                   | 3.35062900  | -0.74360200 | -0.18101300 |
| H                                   | 4.80175100  | -1.47781800 | 2.39657500  |
| Cl                                  | 1.22708200  | 0.86425000  | -0.05488900 |
| Cl                                  | 1.27329600  | -1.71395200 | -1.75708800 |
| C                                   | 1.11852500  | -1.76930600 | 1.10841300  |
| O                                   | 0.29159000  | -2.26046000 | 1.89757800  |
| N                                   | 2.45476400  | -1.99713100 | 1.24733900  |
| H                                   | 2.65666700  | -2.63274900 | 2.01151700  |
| C                                   | 4.38959500  | -2.62358100 | -0.10322000 |
| H                                   | 5.23761900  | -2.24809000 | -0.68689600 |
| H                                   | 3.69753000  | -3.14812200 | -0.76844600 |
| O                                   | 4.85678300  | -3.50008200 | 0.97374300  |
| H                                   | 5.08738700  | -4.38413800 | 0.63073000  |
| O                                   | 3.71422000  | 0.31071000  | 2.17133600  |
| H                                   | 4.13022300  | 0.68671700  | 2.97282800  |
| C                                   | 5.82453200  | -0.18795200 | 1.02136800  |
| C                                   | 7.00888000  | -0.94780000 | 1.03105000  |
| C                                   | 5.83444000  | 1.09918100  | 0.45521700  |
| C                                   | 8.18471000  | -0.43741900 | 0.48219600  |
| H                                   | 6.99642700  | -1.94514900 | 1.45812400  |
| C                                   | 7.00330200  | 1.62193400  | -0.09775700 |
| H                                   | 4.92290700  | 1.68489800  | 0.46779600  |
| C                                   | 8.16417600  | 0.84407100  | -0.07558900 |
| H                                   | 9.10642500  | -1.00408900 | 0.48187100  |
| H                                   | 7.03122900  | 2.60983900  | -0.53831600 |
| N                                   | 9.39631300  | 1.38707800  | -0.65095900 |
| O                                   | 9.36165900  | 2.55122900  | -1.14471400 |
| O                                   | 10.43465400 | 0.66421800  | -0.62692200 |
| O                                   | -0.75681700 | -0.97080300 | -0.10288400 |
| H                                   | -1.23468700 | -0.45075800 | -0.82108000 |
| <b><sup>4</sup>P-OH<sub>1</sub></b> |             |             |             |
| Fe                                  | -3.56839400 | -0.18751500 | -0.03475100 |
| S                                   | -5.98708300 | 0.45067000  | -0.64407400 |
| H                                   | -5.71009800 | 1.29107600  | -1.70633700 |
| N                                   | -3.00464100 | 0.15600400  | -1.93954200 |
| C                                   | -2.13029900 | 1.15903000  | -3.83904800 |
| C                                   | -2.27455800 | -0.16948400 | -4.11869700 |
| H                                   | -1.74589600 | 1.94213300  | -4.47524700 |
| H                                   | -2.03753200 | -0.69288900 | -5.03328300 |
| N                                   | -3.88247800 | -2.12449500 | -0.47637500 |

|    |             |             |             |
|----|-------------|-------------|-------------|
| C  | -3.58562200 | -2.76331400 | -1.66693500 |
| C  | -3.87467300 | -4.17646300 | -1.55786800 |
| C  | -4.34871000 | -4.38909100 | -0.29477800 |
| H  | -3.73075300 | -4.89546200 | -2.35092500 |
| H  | -4.67101000 | -5.31706600 | 0.15419600  |
| N  | -4.39444000 | -0.47302200 | 1.78478000  |
| C  | -4.79485500 | -1.68219000 | 2.33548800  |
| C  | -4.56198700 | 0.47263000  | 2.78267200  |
| C  | -5.22888900 | -1.48379500 | 3.70121000  |
| C  | -5.08194400 | -0.15540500 | 3.97817000  |
| H  | -5.59406100 | -2.26782200 | 4.34818900  |
| H  | -5.30391600 | 0.36686900  | 4.89715100  |
| N  | -3.53574600 | 1.80561100  | 0.31413400  |
| C  | -3.54493600 | 3.86149000  | 1.39506900  |
| H  | -3.69367900 | 4.58216100  | 2.18575400  |
| C  | -3.82243700 | 2.44723400  | 1.51469700  |
| C  | -2.58488900 | 1.35709100  | -2.48108000 |
| C  | -2.81343800 | -0.79487400 | -2.93094900 |
| C  | -4.35175600 | -3.10702800 | 0.37533300  |
| C  | -4.28605000 | 1.82651800  | 2.66094100  |
| H  | -4.45826500 | 2.45048600  | 3.53139800  |
| C  | -2.60607900 | 2.58352900  | -1.82982600 |
| H  | -2.22702600 | 3.44093500  | -2.37388600 |
| C  | -3.08992600 | -2.14673100 | -2.80702800 |
| H  | -2.89761000 | -2.77589900 | -3.66970000 |
| C  | -4.77690100 | -2.90229700 | 1.68150700  |
| H  | -5.12112400 | -3.76985600 | 2.23452500  |
| C  | -3.07365000 | 4.07528100  | 0.13217900  |
| H  | -2.75678700 | 5.00504200  | -0.31686200 |
| C  | -3.05470200 | 2.79505900  | -0.53936700 |
| C  | 0.95567500  | 0.24237600  | 0.31222900  |
| C  | 3.93346900  | 1.14373800  | -0.06605900 |
| C  | 4.93944900  | 0.69808400  | -1.16560100 |
| H  | 3.65028700  | 0.26297600  | 0.51129200  |
| H  | 5.19571000  | 1.58360200  | -1.76083100 |
| Cl | 1.61466800  | -1.45961600 | -0.08483000 |
| Cl | 1.35816900  | 0.69184000  | 2.10509800  |
| C  | 1.43408100  | 1.32878700  | -0.64291800 |
| O  | 0.55865400  | 1.89729300  | -1.33596500 |
| N  | 2.73932700  | 1.70953800  | -0.69638800 |
| H  | 2.90864700  | 2.50178200  | -1.30596100 |
| C  | 4.54984100  | 2.18056000  | 0.87499300  |
| H  | 5.39563800  | 1.75136100  | 1.42389400  |
| H  | 3.78680600  | 2.50943900  | 1.58732400  |
| O  | 4.99595700  | 3.28850100  | 0.02711400  |
| H  | 5.17475200  | 4.08640600  | 0.56005300  |

|   |             |             |             |
|---|-------------|-------------|-------------|
| O | 4.21645800  | -0.26711200 | -1.97637100 |
| H | 4.72902100  | -0.48690900 | -2.78017300 |
| C | 6.21402300  | 0.09710300  | -0.59630400 |
| C | 7.35124500  | 0.89897100  | -0.38803300 |
| C | 6.26502200  | -1.27103200 | -0.27492800 |
| C | 8.52148400  | 0.34979200  | 0.13493500  |
| H | 7.30704500  | 1.95666400  | -0.62639200 |
| C | 7.42865900  | -1.83334100 | 0.24960200  |
| H | 5.39028400  | -1.88569800 | -0.45233400 |
| C | 8.54261800  | -1.01258500 | 0.44621000  |
| H | 9.40793700  | 0.94795100  | 0.29948200  |
| H | 7.48769200  | -2.88330200 | 0.50434900  |
| N | 9.77007900  | -1.59642200 | 0.99146300  |
| O | 9.77447500  | -2.83237500 | 1.25995300  |
| O | 10.76515100 | -0.83470600 | 1.16764500  |
| O | -0.46888584 | 0.12644687  | 0.26654696  |
| H | -0.76591528 | -0.45406650 | 0.97108776  |

### C-H hydroxylation through Path C

<sup>2</sup>RC<sub>2</sub>

|    |             |             |             |
|----|-------------|-------------|-------------|
| Fe | 1.51629200  | -1.36657800 | -0.24527400 |
| O  | 0.74559900  | -0.05842000 | 0.40681700  |
| S  | 2.53808300  | -3.61842200 | -0.98533000 |
| H  | 1.50235000  | -4.04678700 | -1.79447500 |
| N  | 0.39105400  | -1.37043900 | -1.91598600 |
| C  | -1.42747900 | -1.53514300 | -3.34941500 |
| C  | -0.45275700 | -0.85033100 | -4.01555200 |
| H  | -2.42566900 | -1.77978500 | -3.67712600 |
| H  | -0.48585400 | -0.43701000 | -5.01284800 |
| N  | 2.92597400  | -0.30068700 | -1.19801400 |
| C  | 2.87824300  | 0.17632800  | -2.49587400 |
| C  | 4.04978700  | 0.98000200  | -2.77261500 |
| C  | 4.80065800  | 0.99661900  | -1.63164800 |
| H  | 4.25277700  | 1.46678700  | -3.71519000 |
| H  | 5.73283600  | 1.50929200  | -1.44923600 |
| N  | 2.75992100  | -1.60035600 | 1.32436700  |
| C  | 3.96630400  | -0.94509700 | 1.52625300  |
| C  | 2.52902500  | -2.33681000 | 2.47494400  |
| C  | 4.50246200  | -1.28716200 | 2.82558300  |
| C  | 3.61880800  | -2.14950100 | 3.40840600  |
| H  | 5.43535400  | -0.91337900 | 3.22128300  |
| H  | 3.68322700  | -2.62205300 | 4.37754400  |
| N  | 0.23253400  | -2.68417800 | 0.59701700  |
| C  | -0.85657400 | -4.03360000 | 2.14192400  |
| H  | -1.01737500 | -4.60144400 | 3.04667000  |
| C  | 0.34061100  | -3.27611100 | 1.85287100  |

|    |             |             |             |
|----|-------------|-------------|-------------|
| C  | -0.89363800 | -1.86965300 | -2.04734100 |
| C  | 0.67468400  | -0.73378200 | -3.11508400 |
| C  | 4.10314900  | 0.18566900  | -0.65739200 |
| C  | 1.40798100  | -3.11771400 | 2.71903300  |
| H  | 1.35875300  | -3.63443700 | 3.67168600  |
| C  | -1.56185000 | -2.62589000 | -1.09280700 |
| H  | -2.57781500 | -2.92393500 | -1.32202900 |
| C  | 1.84239600  | -0.04199700 | -3.39430100 |
| H  | 1.93871700  | 0.39638000  | -4.38218000 |
| C  | 4.57993300  | -0.10128900 | 0.61458800  |
| H  | 5.52058800  | 0.35259800  | 0.90734600  |
| C  | -1.70219700 | -3.87567500 | 1.08098800  |
| H  | -2.69127400 | -4.28785700 | 0.94498900  |
| C  | -1.02912900 | -3.03083600 | 0.11950400  |
| C  | -5.95080900 | 0.03141300  | -0.37730700 |
| H  | -6.35930000 | -0.32653100 | -1.31552900 |
| C  | -2.39875600 | 1.25717800  | 0.47103300  |
| C  | -2.17456300 | 2.74711200  | 0.09387600  |
| H  | -1.90146900 | 0.63157100  | -0.27336100 |
| H  | -2.80433500 | 3.35752000  | 0.75351200  |
| Cl | -6.33170600 | -1.29451500 | 0.89812900  |
| Cl | -6.86932400 | 1.60424200  | 0.05352400  |
| C  | -4.43937600 | 0.21591600  | -0.50792700 |
| O  | -3.87895200 | -0.38323400 | -1.45300500 |
| N  | -3.83541700 | 0.96185700  | 0.43745600  |
| H  | -4.37978200 | 1.36986800  | 1.18828800  |
| C  | -1.86815800 | 0.91496500  | 1.85855000  |
| H  | -0.79309600 | 1.09744700  | 1.91451200  |
| H  | -2.05884300 | -0.14392900 | 2.06722300  |
| O  | -2.61739300 | 1.77123600  | 2.78908900  |
| H  | -2.41576800 | 1.53807400  | 3.71508300  |
| O  | -2.63997600 | 2.85009900  | -1.28349800 |
| H  | -2.69130300 | 3.78948900  | -1.55155400 |
| C  | -0.73102500 | 3.19710900  | 0.23260000  |
| C  | -0.29745200 | 3.82895300  | 1.41236300  |
| C  | 0.18662600  | 2.97011600  | -0.80605600 |
| C  | 1.03345600  | 4.21287300  | 1.56506300  |
| H  | -1.00453500 | 3.99463000  | 2.21849900  |
| C  | 1.52142000  | 3.34744900  | -0.66812000 |
| H  | -0.15375800 | 2.48603200  | -1.71301600 |
| C  | 1.92756200  | 3.96164100  | 0.51973400  |
| H  | 1.38817100  | 4.69400500  | 2.46682800  |
| H  | 2.24716700  | 3.15737200  | -1.44741600 |
| N  | 3.32990300  | 4.34011900  | 0.68362600  |
| O  | 4.13289900  | 4.10035500  | -0.26637200 |
| O  | 3.68044600  | 4.88693700  | 1.77075500  |

**<sup>4</sup>RC<sub>2</sub>**

|    |             |             |             |
|----|-------------|-------------|-------------|
| Fe | 1.92563800  | -1.16520700 | -0.24201000 |
| O  | 1.17980400  | -0.40131800 | 1.02314200  |
| S  | 2.98694100  | -2.59228700 | -2.09029500 |
| H  | 1.94212100  | -2.56525300 | -2.99526500 |
| N  | 0.84318400  | -0.19286900 | -1.63903300 |
| C  | -0.90979700 | 0.48338600  | -3.00520800 |
| C  | 0.06476300  | 1.43751300  | -3.09503600 |
| H  | -1.88014300 | 0.45594900  | -3.47748100 |
| H  | 0.06175100  | 2.34512700  | -3.68082800 |
| N  | 3.36584500  | 0.23456200  | -0.38644000 |
| C  | 3.31178500  | 1.40933200  | -1.11595600 |
| C  | 4.48156100  | 2.21932100  | -0.84449300 |
| C  | 5.24788200  | 1.52116600  | 0.04367000  |
| H  | 4.65927200  | 3.19731800  | -1.26608100 |
| H  | 6.19397900  | 1.80508500  | 0.48035600  |
| N  | 3.13340600  | -2.27990900 | 0.92574000  |
| C  | 4.36984200  | -1.90797900 | 1.43522100  |
| C  | 2.85594400  | -3.52360800 | 1.47067800  |
| C  | 4.87731800  | -2.94608400 | 2.30601800  |
| C  | 3.94369400  | -3.94155300 | 2.32874300  |
| H  | 5.82535000  | -2.90355700 | 2.82189600  |
| H  | 3.97431200  | -4.87770700 | 2.86665900  |
| N  | 0.60796600  | -2.69542400 | -0.31396600 |
| C  | -0.54071200 | -4.65070100 | 0.19095700  |
| H  | -0.73818100 | -5.61732400 | 0.63073100  |
| C  | 0.66519700  | -3.88332200 | 0.40923300  |
| C  | -0.41720900 | -0.53405900 | -2.10203800 |
| C  | 1.14881800  | 1.02301300  | -2.23099000 |
| C  | 4.55112800  | 0.28266800  | 0.32229600  |
| C  | 1.70530800  | -4.26275800 | 1.24002000  |
| H  | 1.61622300  | -5.21775100 | 1.74680100  |
| C  | -1.11146900 | -1.69235000 | -1.77172800 |
| H  | -2.11007200 | -1.80160000 | -2.17965700 |
| C  | 2.29509200  | 1.76641700  | -1.98925100 |
| H  | 2.39479300  | 2.71775000  | -2.50036400 |
| C  | 5.02221300  | -0.71682000 | 1.16337400  |
| H  | 5.98122600  | -0.55256500 | 1.64327100  |
| C  | -1.33814900 | -3.92342900 | -0.64553300 |
| H  | -2.31828700 | -4.17314300 | -1.02443600 |
| C  | -0.62819100 | -2.70325900 | -0.95862200 |
| C  | -6.04830300 | -0.85219600 | -0.39770100 |
| H  | -6.54059700 | -0.87716200 | -1.36330400 |
| C  | -2.79544600 | 0.93188500  | 0.60466400  |
| C  | -2.95244500 | 2.44764700  | 0.91059300  |
| H  | -2.37573800 | 0.82403200  | -0.39853000 |

|                                     |             |             |             |
|-------------------------------------|-------------|-------------|-------------|
| H                                   | -3.36926900 | 2.54994800  | 1.91963900  |
| Cl                                  | -5.84786900 | -2.64309300 | 0.13113300  |
| Cl                                  | -7.19986000 | 0.03007100  | 0.78242200  |
| C                                   | -4.67581600 | -0.19819600 | -0.53203500 |
| O                                   | -4.15202600 | -0.21263000 | -1.67098200 |
| N                                   | -4.10907000 | 0.28410400  | 0.59088800  |
| H                                   | -4.59777100 | 0.23183900  | 1.47587500  |
| C                                   | -1.89746200 | 0.22309800  | 1.61334500  |
| H                                   | -0.87037200 | 0.59324900  | 1.57199700  |
| H                                   | -1.87843800 | -0.84822700 | 1.38710600  |
| O                                   | -2.50525600 | 0.46586800  | 2.92817400  |
| H                                   | -2.04586900 | -0.05227800 | 3.61642200  |
| O                                   | -3.89648200 | 2.94049500  | -0.08301300 |
| H                                   | -4.18834000 | 3.84485200  | 0.14871100  |
| C                                   | -1.62474400 | 3.18116400  | 0.82694800  |
| C                                   | -0.80009500 | 3.30985800  | 1.95916700  |
| C                                   | -1.19091900 | 3.69697400  | -0.40620300 |
| C                                   | 0.45540800  | 3.90867500  | 1.85834000  |
| H                                   | -1.13467500 | 2.90878900  | 2.91025200  |
| C                                   | 0.06156700  | 4.29540100  | -0.52205100 |
| H                                   | -1.84132400 | 3.61023300  | -1.26769500 |
| C                                   | 0.87567500  | 4.37922500  | 0.61060400  |
| H                                   | 1.11254100  | 3.99914000  | 2.71306200  |
| H                                   | 0.41914500  | 4.68362400  | -1.46613100 |
| N                                   | 2.21389300  | 4.94832200  | 0.47714600  |
| O                                   | 2.64934000  | 5.18162800  | -0.69252900 |
| O                                   | 2.88223500  | 5.16831900  | 1.52658600  |
| <b><sup>2</sup>TS-H<sub>2</sub></b> |             |             |             |
| Fe                                  | 0.22442800  | -1.80996000 | 0.20017800  |
| O                                   | 0.35259800  | -0.10591700 | -0.32554700 |
| S                                   | 0.16802200  | -4.27198300 | 0.50698400  |
| H                                   | -1.00561300 | -4.36099400 | 1.23277200  |
| N                                   | -1.67861800 | -2.09342100 | -0.38919200 |
| C                                   | -3.99967300 | -2.23721100 | -0.44741700 |
| C                                   | -3.54810400 | -2.47502500 | -1.71257900 |
| H                                   | -5.01871900 | -2.22325300 | -0.08959900 |
| H                                   | -4.12456400 | -2.69111000 | -2.59990700 |
| N                                   | 0.88762700  | -2.31720500 | -1.64892700 |
| C                                   | 0.10549900  | -2.53663000 | -2.76625000 |
| C                                   | 0.94823200  | -2.77328000 | -3.92351700 |
| C                                   | 2.24172300  | -2.69709500 | -3.49804900 |
| H                                   | 0.58042900  | -2.97376700 | -4.91906600 |
| H                                   | 3.14639200  | -2.82256500 | -4.07476400 |
| N                                   | 2.14297700  | -1.73900700 | 0.83661100  |
| C                                   | 3.28510500  | -1.90281300 | 0.08215200  |
| C                                   | 2.57072800  | -1.42865900 | 2.11490200  |

|    |             |             |             |
|----|-------------|-------------|-------------|
| C  | 4.46106000  | -1.69083100 | 0.90222500  |
| C  | 4.01889800  | -1.39798300 | 2.16037400  |
| H  | 5.47896600  | -1.75681800 | 0.54729600  |
| H  | 4.60337200  | -1.18035400 | 3.04233100  |
| N  | -0.43762200 | -1.46900300 | 2.07062200  |
| C  | -0.48722400 | -0.99250000 | 4.34136200  |
| H  | -0.11939100 | -0.78197000 | 5.33523400  |
| C  | 0.35030400  | -1.21370200 | 3.18401100  |
| C  | -2.83763800 | -1.98499700 | 0.37660900  |
| C  | -2.10474100 | -2.37877700 | -1.67965700 |
| C  | 2.20331900  | -2.40526600 | -2.07792500 |
| C  | 1.74006600  | -1.18856100 | 3.19985600  |
| H  | 2.21808000  | -0.97218800 | 4.15011100  |
| C  | -2.86832600 | -1.66619600 | 1.72285400  |
| H  | -3.84098000 | -1.60049800 | 2.19871500  |
| C  | -1.28160600 | -2.55562400 | -2.78023300 |
| H  | -1.76541500 | -2.74601200 | -3.73229700 |
| C  | 3.31457400  | -2.22109400 | -1.27296000 |
| H  | 4.29023100  | -2.32120500 | -1.73736400 |
| C  | -1.78565400 | -1.12396000 | 3.92860100  |
| H  | -2.68782700 | -1.04045000 | 4.51697600  |
| C  | -1.74940200 | -1.42719200 | 2.51607900  |
| C  | -4.57724900 | 1.88317400  | -0.86755900 |
| H  | -5.09814000 | 1.30653800  | -1.62327600 |
| C  | -0.91825800 | 2.01643400  | 0.25178200  |
| C  | -0.20209800 | 3.04974000  | -0.63867800 |
| H  | -0.38471000 | 0.70495300  | -0.15971300 |
| H  | -0.54104600 | 4.02958200  | -0.26042900 |
| Cl | -5.40897800 | 1.48317000  | 0.77531900  |
| Cl | -4.84213900 | 3.68750300  | -1.27943100 |
| C  | -3.09368200 | 1.51860600  | -0.87514900 |
| O  | -2.69911700 | 0.76135600  | -1.77740700 |
| N  | -2.34606500 | 2.05341500  | 0.12996700  |
| H  | -2.82262400 | 2.55597100  | 0.87471800  |
| C  | -0.52358400 | 2.07621300  | 1.70708400  |
| H  | 0.56300800  | 2.03330400  | 1.81247400  |
| H  | -0.97304400 | 1.24132700  | 2.25114500  |
| O  | -1.05274600 | 3.35755900  | 2.22352900  |
| H  | -0.95264200 | 3.40289700  | 3.19508100  |
| O  | -0.68784200 | 2.86420700  | -1.99402600 |
| H  | -0.40367800 | 3.61566500  | -2.55268400 |
| C  | 1.31416300  | 3.01463100  | -0.56905800 |
| C  | 2.00056300  | 3.89179900  | 0.28905600  |
| C  | 2.04107400  | 2.11985100  | -1.37331200 |
| C  | 3.39355000  | 3.87072700  | 0.36449600  |
| H  | 1.43756000  | 4.58469400  | 0.90720300  |



|                                      |             |             |             |
|--------------------------------------|-------------|-------------|-------------|
| C                                    | 3.43269800  | 2.08961700  | -1.30962100 |
| H                                    | 1.50340600  | 1.43283500  | -2.01231100 |
| C                                    | 4.09057000  | 2.96381000  | -0.43832000 |
| H                                    | 3.94010500  | 4.53496200  | 1.02068300  |
| H                                    | 4.01020200  | 1.39733000  | -1.90695700 |
| N                                    | 5.55029300  | 2.92162100  | -0.35654700 |
| O                                    | 6.16667800  | 2.08191500  | -1.07624100 |
| O                                    | 6.12951300  | 3.72367000  | 0.43375200  |
| <b><sup>4</sup>TS- H<sub>2</sub></b> |             |             |             |
| Fe                                   | 0.23959400  | -1.72489000 | 0.32751600  |
| O                                    | 0.08931300  | -0.26274900 | -0.64722800 |
| S                                    | 0.28925700  | -4.00582200 | 1.04855800  |
| H                                    | -1.06701000 | -4.23724600 | 1.12660900  |
| N                                    | -1.65853600 | -2.19025300 | -0.32350000 |
| C                                    | -3.96748700 | -2.32517000 | -0.51025900 |
| C                                    | -3.44066300 | -2.78212500 | -1.68280400 |
| H                                    | -5.00588400 | -2.23494900 | -0.22810500 |
| H                                    | -3.96237400 | -3.14341100 | -2.55668800 |
| N                                    | 1.00314000  | -2.48907700 | -1.41044600 |
| C                                    | 0.27480400  | -2.93855600 | -2.50186800 |
| C                                    | 1.18002700  | -3.30929400 | -3.57213900 |
| C                                    | 2.44872800  | -3.08326500 | -3.12433600 |
| H                                    | 0.86643000  | -3.69386200 | -4.53149000 |
| H                                    | 3.38330400  | -3.24638700 | -3.64079800 |
| N                                    | 2.07949700  | -1.50700100 | 1.01877200  |
| C                                    | 3.27500900  | -1.76378800 | 0.35058100  |
| C                                    | 2.44635700  | -1.03201300 | 2.27356500  |
| C                                    | 4.39623400  | -1.44813100 | 1.20733000  |
| C                                    | 3.88640000  | -0.99865800 | 2.39056000  |
| H                                    | 5.43218700  | -1.55864500 | 0.92237800  |
| H                                    | 4.42169600  | -0.67115000 | 3.26962300  |
| N                                    | -0.52781900 | -1.11604900 | 2.04539800  |
| C                                    | -0.73350800 | -0.31865700 | 4.21883600  |
| H                                    | -0.43268500 | 0.03525900  | 5.19414700  |
| C                                    | 0.18142600  | -0.68675000 | 3.16541000  |
| C                                    | -2.85038400 | -1.94521600 | 0.33061800  |
| C                                    | -1.99845900 | -2.68574100 | -1.56912600 |
| C                                    | 2.33248900  | -2.57236000 | -1.77298500 |
| C                                    | 1.56347200  | -0.63897100 | 3.26618300  |
| H                                    | 1.98528300  | -0.28405800 | 4.20024600  |
| C                                    | -2.94840300 | -1.41483400 | 1.60906300  |
| H                                    | -3.94219200 | -1.27616400 | 2.01890900  |
| C                                    | -1.10584000 | -3.03678100 | -2.57142700 |
| H                                    | -1.52818300 | -3.41510000 | -3.49624000 |
| C                                    | 3.39473900  | -2.24101700 | -0.94480100 |
| H                                    | 4.39864900  | -2.37320700 | -1.33462300 |

|                               |             |             |             |
|-------------------------------|-------------|-------------|-------------|
| C                             | -1.99864000 | -0.53698400 | 3.74987500  |
| H                             | -2.93786400 | -0.39357600 | 4.26400100  |
| C                             | -1.87689600 | -1.04174000 | 2.40266000  |
| C                             | -4.60640700 | 1.51361300  | -1.00668100 |
| H                             | -5.09336600 | 0.98346200  | -1.81726800 |
| C                             | -0.92782800 | 1.97912100  | 0.00750500  |
| C                             | -0.17318600 | 3.05905200  | -0.80389300 |
| H                             | -0.34750800 | 0.82421700  | -0.35152200 |
| H                             | -0.49162600 | 4.02113500  | -0.36981900 |
| Cl                            | -5.19904700 | 1.13945500  | 0.62999900  |
| Cl                            | -5.01229000 | 3.63914400  | -1.12362200 |
| C                             | -3.08620400 | 1.43100600  | -1.18771200 |
| O                             | -2.67970200 | 0.88685900  | -2.22826200 |
| N                             | -2.35388800 | 2.00343600  | -0.19878100 |
| H                             | -2.83930700 | 2.59277100  | 0.47584100  |
| C                             | -0.62661700 | 2.04364900  | 1.48819400  |
| H                             | 0.45210900  | 1.97453000  | 1.66454200  |
| H                             | -1.13766700 | 1.22741300  | 2.00665400  |
| O                             | -1.14347900 | 3.34541900  | 1.96258900  |
| H                             | -1.17954400 | 3.37176600  | 2.93901900  |
| O                             | -0.63918000 | 2.96700500  | -2.17782800 |
| H                             | -0.22085900 | 3.66872200  | -2.71671900 |
| C                             | 1.33616100  | 2.97395300  | -0.72911700 |
| C                             | 2.06344300  | 3.87571400  | 0.06772300  |
| C                             | 2.02208300  | 2.00106300  | -1.47973300 |
| C                             | 3.45536400  | 3.80420600  | 0.13697400  |
| H                             | 1.53343700  | 4.62790300  | 0.64379800  |
| C                             | 3.41150200  | 1.92172500  | -1.42273300 |
| H                             | 1.45201600  | 1.31025700  | -2.08796700 |
| C                             | 4.10977800  | 2.82006300  | -0.60862900 |
| H                             | 4.03293200  | 4.48596600  | 0.74722800  |
| H                             | 3.95561600  | 1.17356800  | -1.98139500 |
| N                             | 5.56613500  | 2.71809600  | -0.52621300 |
| O                             | 6.14098000  | 1.80189900  | -1.18599800 |
| O                             | 6.18493000  | 3.54433500  | 0.20688100  |
| <sup>2</sup> INT <sub>2</sub> |             |             |             |
| Fe                            | -2.00890700 | -0.85937200 | 0.03068500  |
| O                             | -0.28265000 | -0.34392000 | 0.05964700  |
| S                             | -4.25712000 | -1.54207800 | -0.07724900 |
| H                             | -4.33854300 | -2.15374100 | 1.15845200  |
| N                             | -1.72249900 | -2.14365200 | 1.55986100  |
| C                             | -1.21023100 | -4.02986600 | 2.80283500  |
| C                             | -1.46038700 | -3.01901400 | 3.68670900  |
| H                             | -0.93498300 | -5.05265700 | 3.01467700  |
| H                             | -1.43306200 | -3.05018300 | 4.76600700  |
| N                             | -2.46487200 | 0.59245700  | 1.32934400  |

|    |             |             |             |
|----|-------------|-------------|-------------|
| C  | -2.36680800 | 0.53349200  | 2.70987500  |
| C  | -2.69941300 | 1.82496600  | 3.27690700  |
| C  | -3.01515500 | 2.65212300  | 2.23925500  |
| H  | -2.68666100 | 2.04984400  | 4.33317300  |
| H  | -3.29168300 | 3.69530000  | 2.26651100  |
| N  | -2.47078200 | 0.35080300  | -1.50769800 |
| C  | -2.94312800 | 1.64901600  | -1.41907600 |
| C  | -2.33700700 | 0.07160400  | -2.86054800 |
| C  | -3.13589400 | 2.18756000  | -2.74820500 |
| C  | -2.75758800 | 1.21925300  | -3.63509800 |
| H  | -3.50997000 | 3.17932600  | -2.95671100 |
| H  | -2.76226900 | 1.26030500  | -4.71469300 |
| N  | -1.51595100 | -2.32737100 | -1.28067800 |
| C  | -0.98745800 | -3.45994000 | -3.22715400 |
| H  | -0.86329500 | -3.64623500 | -4.28428800 |
| C  | -1.46389700 | -2.21715300 | -2.66218000 |
| C  | -1.35499900 | -3.48040100 | 1.47257200  |
| C  | -1.77015900 | -1.83860300 | 2.91068400  |
| C  | -2.87730900 | 1.87761500  | 1.02187000  |
| C  | -1.84769800 | -1.10635600 | -3.40118400 |
| H  | -1.78203700 | -1.17444000 | -4.48165700 |
| C  | -1.08406400 | -4.17189100 | 0.30395500  |
| H  | -0.78354500 | -5.20989400 | 0.39307400  |
| C  | -2.05115400 | -0.59229500 | 3.45005700  |
| H  | -2.03247400 | -0.49624100 | 4.52974600  |
| C  | -3.13044500 | 2.36659900  | -0.24747700 |
| H  | -3.46098600 | 3.39505500  | -0.32964400 |
| C  | -0.79086200 | -4.32960300 | -2.18426100 |
| H  | -0.46716100 | -5.35958800 | -2.22469500 |
| C  | -1.13575500 | -3.62515800 | -0.97031500 |
| C  | 5.14253500  | -1.04558300 | 1.22343300  |
| H  | 6.03810700  | -0.67316500 | 1.70664300  |
| C  | 2.97962600  | 0.18968600  | -1.62496900 |
| C  | 3.13951600  | 1.63116200  | -2.06896500 |
| H  | 0.37614200  | -1.01441100 | -0.24771700 |
| H  | 2.72902700  | 1.66804700  | -3.08495100 |
| Cl | 3.86361000  | -1.28805900 | 2.58289000  |
| Cl | 5.57987500  | -2.72335500 | 0.48995500  |
| C  | 4.68030800  | -0.06533300 | 0.18327600  |
| O  | 5.26440700  | 1.06235900  | 0.12676800  |
| N  | 3.64076400  | -0.45521700 | -0.61227400 |
| H  | 3.25822700  | -1.39244700 | -0.45240700 |
| C  | 1.91966700  | -0.63512200 | -2.30240400 |
| H  | 2.25350500  | -0.95386300 | -3.30316300 |
| H  | 0.99877800  | -0.05040700 | -2.41377800 |
| O  | 1.66304200  | -1.80800100 | -1.46877900 |

|                                    |             |             |             |
|------------------------------------|-------------|-------------|-------------|
| H                                  | 1.16503600  | -2.50210100 | -1.94729500 |
| O                                  | 4.50070000  | 2.07036100  | -2.22191600 |
| H                                  | 4.99362700  | 1.90994400  | -1.37556900 |
| C                                  | 2.27047500  | 2.56265800  | -1.21233900 |
| C                                  | 1.02521500  | 2.97947200  | -1.71298600 |
| C                                  | 2.67671500  | 2.99762400  | 0.06283600  |
| C                                  | 0.17838400  | 3.78322000  | -0.95354000 |
| H                                  | 0.70836800  | 2.67027000  | -2.70421900 |
| C                                  | 1.84204700  | 3.80489900  | 0.83300000  |
| H                                  | 3.64228600  | 2.70025000  | 0.45558700  |
| C                                  | 0.59478100  | 4.17689900  | 0.31944200  |
| H                                  | -0.78633200 | 4.09676300  | -1.32580200 |
| H                                  | 2.13358200  | 4.13917100  | 1.81983900  |
| N                                  | -0.30285200 | 4.98340500  | 1.13947500  |
| O                                  | 0.10557900  | 5.38057400  | 2.26815100  |
| O                                  | -1.46148300 | 5.24161600  | 0.68743500  |
| <b><sup>4</sup>INT<sub>2</sub></b> |             |             |             |
| Fe                                 | 2.00763100  | -0.86045600 | -0.03097200 |
| O                                  | 0.28148900  | -0.34457800 | -0.06034000 |
| S                                  | 4.25552100  | -1.54407400 | 0.07604800  |
| H                                  | 4.33620100  | -2.15638400 | -1.15937200 |
| N                                  | 1.72013200  | -2.14507800 | -1.55982200 |
| C                                  | 1.20633700  | -4.03128100 | -2.80217400 |
| C                                  | 1.45678200  | -3.02077600 | -3.68637000 |
| H                                  | 0.93043100  | -5.05396200 | -3.01369100 |
| H                                  | 1.42909400  | -3.05218900 | -4.76565200 |
| N                                  | 2.46371100  | 0.59084800  | -1.33019400 |
| C                                  | 2.36496100  | 0.53161000  | -2.71066900 |
| C                                  | 2.69785100  | 1.82283200  | -3.27813800 |
| C                                  | 3.01444800  | 2.65007100  | -2.24081400 |
| H                                  | 2.68472300  | 2.04747200  | -4.33445100 |
| H                                  | 3.29146700  | 3.69311000  | -2.26838600 |
| N                                  | 2.47065200  | 0.34978700  | 1.50686400  |
| C                                  | 2.94371600  | 1.64771900  | 1.41774900  |
| C                                  | 2.33756200  | 0.07087800  | 2.85986600  |
| C                                  | 3.13754900  | 2.18638000  | 2.74667300  |
| C                                  | 2.75920700  | 1.21844800  | 3.63395300  |
| H                                  | 3.51228100  | 3.17797700  | 2.95480100  |
| H                                  | 2.76454800  | 1.25969900  | 4.71353700  |
| N                                  | 1.51453400  | -2.32795000 | 1.28088700  |
| C                                  | 0.98631300  | -3.45984500 | 3.22781000  |
| H                                  | 0.86248900  | -3.64585300 | 4.28503400  |
| C                                  | 1.46325000  | -2.21747600 | 2.66237900  |
| C                                  | 1.35186400  | -3.48156900 | -1.47209800 |
| C                                  | 1.76746900  | -1.84036100 | -2.91071300 |
| C                                  | 2.87686500  | 1.87586400  | -1.02319800 |

|                                       |             |             |             |
|---------------------------------------|-------------|-------------|-------------|
| C                                     | 1.84803000  | -1.10674500 | 3.40099400  |
| H                                     | 1.78299800  | -1.17464000 | 4.48151600  |
| C                                     | 1.08086200  | -4.17256900 | -0.30320000 |
| H                                     | 0.77961100  | -5.21039300 | -0.39194100 |
| C                                     | 2.04869400  | -0.59425200 | -3.45046200 |
| H                                     | 2.02962900  | -0.49844800 | -4.53016800 |
| C                                     | 3.13087000  | 2.36497400  | 0.24593500  |
| H                                     | 3.46203100  | 3.39325500  | 0.32774800  |
| C                                     | 0.78854500  | -4.32955100 | 2.18515900  |
| H                                     | 0.46429600  | -5.35935100 | 2.22594900  |
| C                                     | 1.13334600  | -3.62555000 | 0.97091000  |
| C                                     | -5.14194900 | -1.04178500 | -1.22351100 |
| H                                     | -6.03703200 | -0.66832100 | -1.70681800 |
| C                                     | -2.97806500 | 0.19051700  | 1.62544400  |
| C                                     | -3.13658000 | 1.63212300  | 2.06951900  |
| H                                     | -0.37736100 | -1.01474000 | 0.24763600  |
| H                                     | -2.72584100 | 1.66863000  | 3.08541100  |
| Cl                                    | -3.86285300 | -1.28490100 | -2.58266100 |
| Cl                                    | -5.58116300 | -2.71951100 | -0.49090500 |
| C                                     | -4.67914400 | -0.06250300 | -0.18274600 |
| O                                     | -5.26230600 | 1.06567000  | -0.12581100 |
| N                                     | -3.64012800 | -0.45365600 | 0.61288100  |
| H                                     | -3.25858800 | -1.39124000 | 0.45276500  |
| C                                     | -1.92124900 | -0.63676500 | 2.30481100  |
| H                                     | -2.25900300 | -0.95733100 | 3.30372600  |
| H                                     | -1.00023300 | -0.05328900 | 2.42075600  |
| O                                     | -1.66347300 | -1.80834600 | 1.46978600  |
| H                                     | -1.16581800 | -2.50304200 | 1.94783400  |
| O                                     | -4.49745700 | 2.07227500  | 2.22285600  |
| H                                     | -4.99059700 | 1.91268500  | 1.37647400  |
| C                                     | -2.26723000 | 2.56326300  | 1.21284600  |
| C                                     | -1.02204200 | 2.98009900  | 1.71363300  |
| C                                     | -2.67331000 | 2.99813300  | -0.06239700 |
| C                                     | -0.17517900 | 3.78389200  | 0.95428800  |
| H                                     | -0.70529200 | 2.67088900  | 2.70489300  |
| C                                     | -1.83859600 | 3.80545300  | -0.83247800 |
| H                                     | -3.63873900 | 2.70056600  | -0.45532700 |
| C                                     | -0.59145200 | 4.17755800  | -0.31875300 |
| H                                     | 0.78947700  | 4.09749400  | 1.32666700  |
| H                                     | -2.13005200 | 4.13969500  | -1.81934900 |
| N                                     | 0.30620700  | 4.98415700  | -1.13866900 |
| O                                     | -0.10261900 | 5.38237000  | -2.26685800 |
| O                                     | 1.46520200  | 5.24139600  | -0.68708300 |
| <b><sup>2</sup>TS-reb<sub>2</sub></b> |             |             |             |
| Fe                                    | 0.31191900  | -1.89991400 | 0.19482300  |
| O                                     | 0.11035500  | -0.11411000 | 0.06507400  |

|    |             |             |             |
|----|-------------|-------------|-------------|
| S  | 0.63193100  | -4.22641900 | 0.32429600  |
| H  | 0.15809600  | -4.42125900 | 1.60695500  |
| N  | 0.12748800  | -1.84288200 | 2.20306200  |
| C  | 0.58588600  | -1.65456900 | 4.46571500  |
| C  | -0.77016700 | -1.75276000 | 4.33484600  |
| H  | 1.16599800  | -1.54860200 | 5.37069000  |
| H  | -1.52083600 | -1.74563000 | 5.11140700  |
| N  | -1.66648000 | -2.13649000 | 0.01527800  |
| C  | -2.60710600 | -2.06789900 | 1.02991500  |
| C  | -3.93730900 | -2.19816400 | 0.46984000  |
| C  | -3.79391900 | -2.36390600 | -0.87647600 |
| H  | -4.84924300 | -2.16417200 | 1.04746700  |
| H  | -4.55986500 | -2.47108100 | -1.62965000 |
| N  | 0.53624800  | -2.14195300 | -1.78888800 |
| C  | -0.46922500 | -2.40277700 | -2.70395800 |
| C  | 1.71341500  | -2.03611700 | -2.51634600 |
| C  | 0.09468500  | -2.48934800 | -4.03372400 |
| C  | 1.43658500  | -2.25807000 | -3.91920600 |
| H  | -0.47646300 | -2.69787500 | -4.92664700 |
| H  | 2.18296000  | -2.24156700 | -4.70015600 |
| N  | 2.31428700  | -1.62920900 | 0.38163600  |
| C  | 4.54523600  | -1.26128500 | -0.10643200 |
| H  | 5.44508800  | -1.15391200 | -0.69498300 |
| C  | 3.23555300  | -1.54150800 | -0.65128800 |
| C  | 1.14790300  | -1.69167800 | 3.13334000  |
| C  | -1.05725200 | -1.85992200 | 2.92146400  |
| C  | -2.37252600 | -2.33467200 | -1.15878900 |
| C  | 2.96234300  | -1.73345800 | -1.99882000 |
| H  | 3.79165800  | -1.66491800 | -2.69445200 |
| C  | 2.49052500  | -1.51814400 | 2.84265800  |
| H  | 3.17180200  | -1.38785300 | 3.67608000  |
| C  | -2.33125900 | -1.94600900 | 2.38044700  |
| H  | -3.17069100 | -1.92707000 | 3.06623100  |
| C  | -1.82353200 | -2.48939400 | -2.41938900 |
| H  | -2.50624000 | -2.65083000 | -3.24496100 |
| C  | 4.41523200  | -1.21969400 | 1.25884800  |
| H  | 5.18633600  | -1.06359800 | 1.99933600  |
| C  | 3.02362000  | -1.46463200 | 1.56270200  |
| C  | 2.43531100  | 4.02408200  | 0.84812000  |
| H  | 2.51920100  | 5.10208100  | 0.77659700  |
| C  | 0.62782900  | 1.38366000  | -1.17145500 |
| C  | -0.45924800 | 1.83679800  | -2.12722100 |
| H  | 0.85960300  | 0.43347100  | 0.40688100  |
| H  | -0.57621100 | 1.01455200  | -2.84297700 |
| Cl | 1.81601200  | 3.65064100  | 2.58578800  |
| Cl | 4.17537700  | 3.33103800  | 0.65773500  |

|                                       |             |             |             |
|---------------------------------------|-------------|-------------|-------------|
| C                                     | 1.49456500  | 3.51567300  | -0.20681600 |
| O                                     | 0.84416700  | 4.37072200  | -0.88649700 |
| N                                     | 1.39016900  | 2.16015000  | -0.33810700 |
| H                                     | 1.96981600  | 1.58638200  | 0.28243500  |
| C                                     | 1.82847700  | 1.10118700  | -2.03252800 |
| H                                     | 1.54818200  | 0.45472600  | -2.87257700 |
| O                                     | -0.11381900 | 2.96943100  | -2.94395500 |
| H                                     | 0.17089200  | 3.71966400  | -2.35991000 |
| C                                     | -1.80230400 | 1.97462000  | -1.39654800 |
| C                                     | -2.73480700 | 0.92714100  | -1.48743900 |
| C                                     | -2.11975100 | 3.10988700  | -0.62800700 |
| C                                     | -3.94622100 | 0.98260700  | -0.80241100 |
| H                                     | -2.51307400 | 0.05504700  | -2.09474800 |
| C                                     | -3.32923300 | 3.18153200  | 0.06014800  |
| H                                     | -1.41907100 | 3.93437700  | -0.56277700 |
| C                                     | -4.22318600 | 2.10851900  | -0.02491300 |
| H                                     | -4.66264600 | 0.17550800  | -0.85625300 |
| H                                     | -3.58467900 | 4.04176100  | 0.66457600  |
| N                                     | -5.47058200 | 2.15739000  | 0.73024900  |
| O                                     | -5.73737000 | 3.20488600  | 1.38606800  |
| O                                     | -6.22937500 | 1.13907700  | 0.70490100  |
| O                                     | 2.37175200  | 2.31528100  | -2.55762600 |
| H                                     | 2.89103700  | 2.12136300  | -3.34142400 |
| H                                     | 2.55963300  | 0.60983100  | -1.42517200 |
| <b><sup>4</sup>TS-reb<sub>2</sub></b> |             |             |             |
| Fe                                    | 0.31191900  | -1.89991400 | 0.19482300  |
| O                                     | 0.11035500  | -0.11411000 | 0.06507400  |
| S                                     | 0.63193100  | -4.22641900 | 0.32429600  |
| H                                     | 0.15809600  | -4.42125900 | 1.60695500  |
| N                                     | 0.12748800  | -1.84288200 | 2.20306200  |
| C                                     | 0.58588600  | -1.65456900 | 4.46571500  |
| C                                     | -0.77016700 | -1.75276000 | 4.33484600  |
| H                                     | 1.16599800  | -1.54860200 | 5.37069000  |
| H                                     | -1.52083600 | -1.74563000 | 5.11140700  |
| N                                     | -1.66648000 | -2.13649000 | 0.01527800  |
| C                                     | -2.60710600 | -2.06789900 | 1.02991500  |
| C                                     | -3.93730900 | -2.19816400 | 0.46984000  |
| C                                     | -3.79391900 | -2.36390600 | -0.87647600 |
| H                                     | -4.84924300 | -2.16417200 | 1.04746700  |
| H                                     | -4.55986500 | -2.47108100 | -1.62965000 |
| N                                     | 0.53624800  | -2.14195300 | -1.78888800 |
| C                                     | -0.46922500 | -2.40277700 | -2.70395800 |
| C                                     | 1.71341500  | -2.03611700 | -2.51634600 |
| C                                     | 0.09468500  | -2.48934800 | -4.03372400 |
| C                                     | 1.43658500  | -2.25807000 | -3.91920600 |
| H                                     | -0.47646300 | -2.69787500 | -4.92664700 |

|    |             |             |             |
|----|-------------|-------------|-------------|
| H  | 2.18296000  | -2.24156700 | -4.70015600 |
| N  | 2.31428700  | -1.62920900 | 0.38163600  |
| C  | 4.54523600  | -1.26128500 | -0.10643200 |
| H  | 5.44508800  | -1.15391200 | -0.69498300 |
| C  | 3.23555300  | -1.54150800 | -0.65128800 |
| C  | 1.14790300  | -1.69167800 | 3.13334000  |
| C  | -1.05725200 | -1.85992200 | 2.92146400  |
| C  | -2.37252600 | -2.33467200 | -1.15878900 |
| C  | 2.96234300  | -1.73345800 | -1.99882000 |
| H  | 3.79165800  | -1.66491800 | -2.69445200 |
| C  | 2.49052500  | -1.51814400 | 2.84265800  |
| H  | 3.17180200  | -1.38785300 | 3.67608000  |
| C  | -2.33125900 | -1.94600900 | 2.38044700  |
| H  | -3.17069100 | -1.92707000 | 3.06623100  |
| C  | -1.82353200 | -2.48939400 | -2.41938900 |
| H  | -2.50624000 | -2.65083000 | -3.24496100 |
| C  | 4.41523200  | -1.21969400 | 1.25884800  |
| H  | 5.18633600  | -1.06359800 | 1.99933600  |
| C  | 3.02362000  | -1.46463200 | 1.56270200  |
| C  | 2.43531100  | 4.02408200  | 0.84812000  |
| H  | 2.51920100  | 5.10208100  | 0.77659700  |
| C  | 0.62782900  | 1.38366000  | -1.17145500 |
| C  | -0.45924800 | 1.83679800  | -2.12722100 |
| H  | 0.85960300  | 0.43347100  | 0.40688100  |
| H  | -0.57621100 | 1.01455200  | -2.84297700 |
| Cl | 1.81601200  | 3.65064100  | 2.58578800  |
| Cl | 4.17537700  | 3.33103800  | 0.65773500  |
| C  | 1.49456500  | 3.51567300  | -0.20681600 |
| O  | 0.84416700  | 4.37072200  | -0.88649700 |
| N  | 1.39016900  | 2.16015000  | -0.33810700 |
| H  | 1.96981600  | 1.58638200  | 0.28243500  |
| C  | 1.82847700  | 1.10118700  | -2.03252800 |
| H  | 1.54818200  | 0.45472600  | -2.87257700 |
| O  | -0.11381900 | 2.96943100  | -2.94395500 |
| H  | 0.17089200  | 3.71966400  | -2.35991000 |
| C  | -1.80230400 | 1.97462000  | -1.39654800 |
| C  | -2.73480700 | 0.92714100  | -1.48743900 |
| C  | -2.11975100 | 3.10988700  | -0.62800700 |
| C  | -3.94622100 | 0.98260700  | -0.80241100 |
| H  | -2.51307400 | 0.05504700  | -2.09474800 |
| C  | -3.32923300 | 3.18153200  | 0.06014800  |
| H  | -1.41907100 | 3.93437700  | -0.56277700 |
| C  | -4.22318600 | 2.10851900  | -0.02491300 |
| H  | -4.66264600 | 0.17550800  | -0.85625300 |
| H  | -3.58467900 | 4.04176100  | 0.66457600  |
| N  | -5.47058200 | 2.15739000  | 0.73024900  |



|                                     |             |             |             |
|-------------------------------------|-------------|-------------|-------------|
| O                                   | -5.73737000 | 3.20488600  | 1.38606800  |
| O                                   | -6.22937500 | 1.13907700  | 0.70490100  |
| O                                   | 2.37175200  | 2.31528100  | -2.55762600 |
| H                                   | 2.89103700  | 2.12136300  | -3.34142400 |
| H                                   | 2.55963300  | 0.60983100  | -1.42517200 |
| <b><sup>2</sup>P-OH<sub>2</sub></b> |             |             |             |
| Fe                                  | 2.02587700  | -0.87125100 | 0.60124100  |
| O                                   | 0.09505000  | -0.07215100 | -0.89601500 |
| S                                   | 3.62735000  | -1.89676300 | 2.00186200  |
| H                                   | 3.42010600  | -1.14203600 | 3.14120800  |
| N                                   | 1.37194600  | 0.42187500  | 2.00402100  |
| C                                   | 1.26549000  | 2.22047800  | 3.45564200  |
| C                                   | 0.34361500  | 1.30398100  | 3.87967700  |
| H                                   | 1.48689500  | 3.18752200  | 3.88269500  |
| H                                   | -0.33089800 | 1.37939500  | 4.71997200  |
| N                                   | 0.40151300  | -2.14339300 | 1.07101400  |
| C                                   | -0.42846900 | -2.03009700 | 2.17648500  |
| C                                   | -1.21199900 | -3.24056100 | 2.31410300  |
| C                                   | -0.81980400 | -4.09235300 | 1.31344200  |
| H                                   | -1.94662100 | -3.41956600 | 3.08580600  |
| H                                   | -1.16985400 | -5.09726500 | 1.12502800  |
| N                                   | 2.52093300  | -2.08301800 | -0.92347100 |
| C                                   | 2.00410800  | -3.34761100 | -1.17288400 |
| C                                   | 3.51995400  | -1.85598000 | -1.86025600 |
| C                                   | 2.71760700  | -3.93652900 | -2.29047000 |
| C                                   | 3.64339600  | -3.02438500 | -2.71118200 |
| H                                   | 2.51781900  | -4.91834900 | -2.69441900 |
| H                                   | 4.34607600  | -3.11570400 | -3.52657900 |
| N                                   | 3.25414600  | 0.62298600  | -0.18787100 |
| C                                   | 4.93161600  | 1.67839500  | -1.37733500 |
| H                                   | 5.69365100  | 1.83589300  | -2.12675100 |
| C                                   | 4.13433900  | 0.47326700  | -1.24375600 |
| C                                   | 1.91122400  | 1.67769500  | 2.27823700  |
| C                                   | 0.39799400  | 0.17703200  | 2.97174000  |
| C                                   | 0.20705700  | -3.41305600 | 0.54900200  |
| C                                   | 4.25515200  | -0.68208800 | -2.01204700 |
| H                                   | 4.99547000  | -0.67195200 | -2.80537500 |
| C                                   | 2.87581300  | 2.34243400  | 1.52268300  |
| H                                   | 3.16963400  | 3.32723600  | 1.87066800  |
| C                                   | -0.43093800 | -0.94077400 | 3.04562300  |
| H                                   | -1.13369800 | -0.96943500 | 3.87187900  |
| C                                   | 0.94471700  | -3.95568600 | -0.50170800 |
| H                                   | 0.68484700  | -4.96094600 | -0.81795700 |
| C                                   | 4.54186000  | 2.53331400  | -0.38163000 |
| H                                   | 4.92488900  | 3.52005600  | -0.16547500 |
| C                                   | 3.50092800  | 1.86196100  | 0.37432600  |

|                                     |             |             |             |
|-------------------------------------|-------------|-------------|-------------|
| C                                   | -1.89627100 | 4.07403600  | 0.18239900  |
| H                                   | -2.51112100 | 4.89851800  | -0.15995900 |
| C                                   | -0.51136800 | 0.95757700  | -1.70155100 |
| C                                   | -1.64286300 | 0.32789000  | -2.59123900 |
| H                                   | -1.11603300 | -0.45167200 | -3.14835800 |
| Cl                                  | -2.74039400 | 3.36905100  | 1.69553500  |
| Cl                                  | -0.23275700 | 4.77910900  | 0.63432000  |
| C                                   | -1.81279900 | 3.02324700  | -0.91852700 |
| O                                   | -2.61453600 | 3.17417500  | -1.88014100 |
| N                                   | -0.94642600 | 2.00886800  | -0.74352100 |
| H                                   | -0.34111000 | 2.04088200  | 0.07252900  |
| C                                   | 0.63870400  | 1.49957600  | -2.58193200 |
| H                                   | 0.97260600  | 0.68705400  | -3.24005700 |
| O                                   | -2.10313900 | 1.25202700  | -3.60439400 |
| H                                   | -2.49007700 | 2.05346800  | -3.15394700 |
| C                                   | -2.76612100 | -0.33978200 | -1.80616300 |
| C                                   | -2.59116500 | -1.66678700 | -1.36566800 |
| C                                   | -3.97593500 | 0.31743000  | -1.51942100 |
| C                                   | -3.58225000 | -2.31701000 | -0.62942100 |
| H                                   | -1.68303900 | -2.20686000 | -1.61529900 |
| C                                   | -4.97848900 | -0.32314400 | -0.79201800 |
| H                                   | -4.14100200 | 1.33095900  | -1.86124800 |
| C                                   | -4.76409200 | -1.63069200 | -0.34976200 |
| H                                   | -3.45203400 | -3.33102100 | -0.27776600 |
| H                                   | -5.91342400 | 0.17106800  | -0.56339200 |
| N                                   | -5.81025200 | -2.30336300 | 0.42451400  |
| O                                   | -6.88166500 | -1.67212800 | 0.65201900  |
| O                                   | -5.58639400 | -3.48079300 | 0.82964900  |
| O                                   | 0.25614300  | 2.67834500  | -3.31153300 |
| H                                   | -0.46096100 | 2.42867100  | -3.93689700 |
| H                                   | 1.46626300  | 1.78119800  | -1.93211200 |
| H                                   | -0.54800200 | -0.60925700 | -0.38158800 |
| <b><sup>4</sup>P-OH<sub>2</sub></b> |             |             |             |
| Fe                                  | 2.02587700  | -0.87125100 | 0.60124100  |
| O                                   | 0.09505000  | -0.07215100 | -0.89601500 |
| S                                   | 3.62735000  | -1.89676300 | 2.00186200  |
| H                                   | 3.42010600  | -1.14203600 | 3.14120800  |
| N                                   | 1.37194600  | 0.42187500  | 2.00402100  |
| C                                   | 1.26549000  | 2.22047800  | 3.45564200  |
| C                                   | 0.34361500  | 1.30398100  | 3.87967700  |
| H                                   | 1.48689500  | 3.18752200  | 3.88269500  |
| H                                   | -0.33089800 | 1.37939500  | 4.71997200  |
| N                                   | 0.40151300  | -2.14339300 | 1.07101400  |
| C                                   | -0.42846900 | -2.03009700 | 2.17648500  |
| C                                   | -1.21199900 | -3.24056100 | 2.31410300  |
| C                                   | -0.81980400 | -4.09235300 | 1.31344200  |

|    |             |             |             |
|----|-------------|-------------|-------------|
| H  | -1.94662100 | -3.41956600 | 3.08580600  |
| H  | -1.16985400 | -5.09726500 | 1.12502800  |
| N  | 2.52093300  | -2.08301800 | -0.92347100 |
| C  | 2.00410800  | -3.34761100 | -1.17288400 |
| C  | 3.51995400  | -1.85598000 | -1.86025600 |
| C  | 2.71760700  | -3.93652900 | -2.29047000 |
| C  | 3.64339600  | -3.02438500 | -2.71118200 |
| H  | 2.51781900  | -4.91834900 | -2.69441900 |
| H  | 4.34607600  | -3.11570400 | -3.52657900 |
| N  | 3.25414600  | 0.62298600  | -0.18787100 |
| C  | 4.93161600  | 1.67839500  | -1.37733500 |
| H  | 5.69365100  | 1.83589300  | -2.12675100 |
| C  | 4.13433900  | 0.47326700  | -1.24375600 |
| C  | 1.91122400  | 1.67769500  | 2.27823700  |
| C  | 0.39799400  | 0.17703200  | 2.97174000  |
| C  | 0.20705700  | -3.41305600 | 0.54900200  |
| C  | 4.25515200  | -0.68208800 | -2.01204700 |
| H  | 4.99547000  | -0.67195200 | -2.80537500 |
| C  | 2.87581300  | 2.34243400  | 1.52268300  |
| H  | 3.16963400  | 3.32723600  | 1.87066800  |
| C  | -0.43093800 | -0.94077400 | 3.04562300  |
| H  | -1.13369800 | -0.96943500 | 3.87187900  |
| C  | 0.94471700  | -3.95568600 | -0.50170800 |
| H  | 0.68484700  | -4.96094600 | -0.81795700 |
| C  | 4.54186000  | 2.53331400  | -0.38163000 |
| H  | 4.92488900  | 3.52005600  | -0.16547500 |
| C  | 3.50092800  | 1.86196100  | 0.37432600  |
| C  | -1.89627100 | 4.07403600  | 0.18239900  |
| H  | -2.51112100 | 4.89851800  | -0.15995900 |
| C  | -0.51136800 | 0.95757700  | -1.70155100 |
| C  | -1.64286300 | 0.32789000  | -2.59123900 |
| H  | -1.11603300 | -0.45167200 | -3.14835800 |
| Cl | -2.74039400 | 3.36905100  | 1.69553500  |
| Cl | -0.23275700 | 4.77910900  | 0.63432000  |
| C  | -1.81279900 | 3.02324700  | -0.91852700 |
| O  | -2.61453600 | 3.17417500  | -1.88014100 |
| N  | -0.94642600 | 2.00886800  | -0.74352100 |
| H  | -0.34111000 | 2.04088200  | 0.07252900  |
| C  | 0.63870400  | 1.49957600  | -2.58193200 |
| H  | 0.97260600  | 0.68705400  | -3.24005700 |
| O  | -2.10313900 | 1.25202700  | -3.60439400 |
| H  | -2.49007700 | 2.05346800  | -3.15394700 |
| C  | -2.76612100 | -0.33978200 | -1.80616300 |
| C  | -2.59116500 | -1.66678700 | -1.36566800 |
| C  | -3.97593500 | 0.31743000  | -1.51942100 |
| C  | -3.58225000 | -2.31701000 | -0.62942100 |

|   |             |             |             |
|---|-------------|-------------|-------------|
| H | -1.68303900 | -2.20686000 | -1.61529900 |
| C | -4.97848900 | -0.32314400 | -0.79201800 |
| H | -4.14100200 | 1.33095900  | -1.86124800 |
| C | -4.76409200 | -1.63069200 | -0.34976200 |
| H | -3.45203400 | -3.33102100 | -0.27776600 |
| H | -5.91342400 | 0.17106800  | -0.56339200 |
| N | -5.81025200 | -2.30336300 | 0.42451400  |
| O | -6.88166500 | -1.67212800 | 0.65201900  |
| O | -5.58639400 | -3.48079300 | 0.82964900  |
| O | 0.25614300  | 2.67834500  | -3.31153300 |
| H | -0.46096100 | 2.42867100  | -3.93689700 |
| H | 1.46626300  | 1.78119800  | -1.93211200 |
| H | -0.54800200 | -0.60925700 | -0.38158800 |

### C-H hydroxylation through Path D

${}^2\text{RC}_3$

|    |             |             |             |
|----|-------------|-------------|-------------|
| Fe | -2.33279800 | 0.76456800  | -0.21806900 |
| O  | -1.06821300 | 0.12672400  | 0.64457900  |
| S  | -4.46657100 | 1.39345300  | -1.48390600 |
| H  | -5.16448900 | 1.96600600  | -0.43655900 |
| N  | -2.65077400 | 2.28005800  | 1.07445800  |
| C  | -3.29085200 | 3.49916700  | 2.94115600  |
| C  | -2.42837900 | 4.28210200  | 2.22703600  |
| H  | -3.79669400 | 3.73066300  | 3.86696000  |
| H  | -2.08907800 | 5.28276100  | 2.45099600  |
| N  | -1.19939500 | 1.97816400  | -1.35807100 |
| C  | -0.78318700 | 3.26233200  | -1.04431400 |
| C  | 0.08116400  | 3.77094100  | -2.08507000 |
| C  | 0.17787000  | 2.79400300  | -3.03641300 |
| H  | 0.53754600  | 4.74982100  | -2.08123600 |
| H  | 0.72687300  | 2.81631800  | -3.96644000 |
| N  | -2.25013400 | -0.64786900 | -1.65266700 |
| C  | -1.52805600 | -0.59694500 | -2.83952300 |
| C  | -2.79861200 | -1.91749400 | -1.59913900 |
| C  | -1.64265500 | -1.85727900 | -3.54129100 |
| C  | -2.41541300 | -2.67437200 | -2.77085300 |
| H  | -1.17234800 | -2.07555000 | -4.48846200 |
| H  | -2.70284000 | -3.69814900 | -2.95513900 |
| N  | -3.70502500 | -0.34251300 | 0.76853100  |
| C  | -4.94415100 | -2.15494300 | 1.52502400  |
| H  | -5.36283300 | -3.15016300 | 1.54197200  |
| C  | -4.05371800 | -1.66178100 | 0.49807200  |
| C  | -3.42313200 | 2.25160100  | 2.22244800  |
| C  | -2.02870500 | 3.52014100  | 1.06541500  |
| C  | -0.62251300 | 1.67957200  | -2.57899600 |
| C  | -3.61546800 | -2.39763900 | -0.58765100 |

|                              |             |             |             |
|------------------------------|-------------|-------------|-------------|
| H                            | -3.94106800 | -3.42843200 | -0.65932500 |
| C                            | -4.21383400 | 1.18436400  | 2.63401000  |
| H                            | -4.76481000 | 1.30157400  | 3.56101400  |
| C                            | -1.16139500 | 3.97493400  | 0.08458800  |
| H                            | -0.75624500 | 4.97454000  | 0.20165200  |
| C                            | -0.78496200 | 0.48486000  | -3.27470400 |
| H                            | -0.28061500 | 0.39207100  | -4.23102700 |
| C                            | -5.12785100 | -1.14331800 | 2.42230300  |
| H                            | -5.72699000 | -1.14572800 | 3.32094100  |
| C                            | -4.34259200 | -0.01852000 | 1.96492500  |
| C                            | 1.49012600  | -4.52694000 | 0.28665200  |
| H                            | 1.01027500  | -5.47323400 | 0.06600100  |
| C                            | 1.93871200  | -1.51526300 | 0.95284700  |
| C                            | 2.03801600  | -0.28977100 | 0.00467700  |
| H                            | 2.76472600  | -2.19455700 | 0.74012300  |
| H                            | 1.20548300  | 0.38056500  | 0.25444600  |
| Cl                           | 2.75101500  | -4.27151100 | -1.07148700 |
| Cl                           | 2.35043000  | -4.77604800 | 1.94198100  |
| C                            | 0.39883700  | -3.45865900 | 0.33241000  |
| O                            | -0.75190100 | -3.87263500 | 0.03732800  |
| N                            | 0.65569200  | -2.18690800 | 0.69910200  |
| H                            | -0.15095400 | -1.55385300 | 0.66293100  |
| C                            | 1.98379000  | -1.13481600 | 2.43992600  |
| O                            | 1.84377300  | -0.83567700 | -1.33908100 |
| H                            | 1.63389500  | -0.10852000 | -1.95879100 |
| C                            | 3.34688600  | 0.47357900  | 0.06503800  |
| C                            | 3.40017800  | 1.75244500  | 0.64323200  |
| C                            | 4.51005300  | -0.07095000 | -0.50747500 |
| C                            | 4.59164400  | 2.47392500  | 0.67411800  |
| H                            | 2.50219800  | 2.18101500  | 1.07680800  |
| C                            | 5.71068400  | 0.63494600  | -0.48288400 |
| H                            | 4.46108200  | -1.04430800 | -0.98142700 |
| C                            | 5.73542000  | 1.90124800  | 0.11090400  |
| H                            | 4.65218800  | 3.45913500  | 1.11703700  |
| H                            | 6.61768800  | 0.22976900  | -0.91159700 |
| N                            | 6.98834100  | 2.65251000  | 0.13463900  |
| O                            | 8.01445800  | 2.12448400  | -0.38594800 |
| O                            | 6.98953200  | 3.79874900  | 0.67461800  |
| O                            | 3.31495700  | -0.63377700 | 2.73296500  |
| H                            | 3.41846700  | -0.46980200 | 3.69021800  |
| H                            | 1.21207600  | -0.37968300 | 2.65041800  |
| H                            | 1.76058800  | -2.03362200 | 3.02592600  |
| <sup>4</sup> RC <sub>3</sub> |             |             |             |
| Fe                           | -2.37028300 | 0.70010800  | -0.22740200 |
| O                            | -1.04744200 | 0.13009400  | 0.59698900  |
| S                            | -4.50895100 | 1.63934400  | -1.23521400 |

|    |             |             |             |
|----|-------------|-------------|-------------|
| H  | -4.03878100 | 2.89105100  | -1.58630700 |
| N  | -1.29020200 | 1.97907900  | -1.36393700 |
| C  | -0.04505700 | 3.80876500  | -2.06030700 |
| C  | 0.09483700  | 2.84006100  | -3.01513300 |
| H  | 0.38474400  | 4.79951100  | -2.04353100 |
| H  | 0.65994300  | 2.88334500  | -3.93476800 |
| N  | -2.22396500 | -0.69492500 | -1.67045500 |
| C  | -1.49568300 | -0.60965200 | -2.84634100 |
| C  | -1.57555700 | -1.86034000 | -3.57031800 |
| C  | -2.34794400 | -2.70206400 | -2.82490100 |
| H  | -1.08819200 | -2.05474700 | -4.51407600 |
| H  | -2.61755600 | -3.72682100 | -3.02978900 |
| N  | -3.66382300 | -0.47104500 | 0.77372900  |
| C  | -3.99871700 | -1.78392100 | 0.46916600  |
| C  | -4.29540700 | -0.18569300 | 1.97291100  |
| C  | -4.86240900 | -2.32284700 | 1.49657600  |
| C  | -5.04562300 | -1.33808000 | 2.42339600  |
| H  | -5.26459900 | -3.32497200 | 1.49288800  |
| H  | -5.63085900 | -1.37106400 | 3.33043100  |
| N  | -2.75686700 | 2.20567600  | 1.06188300  |
| C  | -3.44972600 | 3.39073900  | 2.93612000  |
| H  | -3.96310200 | 3.59660800  | 3.86377100  |
| C  | -3.51940400 | 2.13453500  | 2.22451600  |
| C  | -0.91055800 | 3.27071400  | -1.03594300 |
| C  | -0.67902700 | 1.69998600  | -2.57739000 |
| C  | -2.75356400 | -1.96923400 | -1.64585000 |
| C  | -4.22254000 | 1.02209500  | 2.65097800  |
| H  | -4.76638900 | 1.10290800  | 3.58589400  |
| C  | -1.32612300 | 3.96582500  | 0.09393600  |
| H  | -0.95298700 | 4.97643800  | 0.22193000  |
| C  | -0.78659500 | 0.50180600  | -3.27230500 |
| H  | -0.26874800 | 0.42818700  | -4.22320300 |
| C  | -3.57256800 | -2.48005300 | -0.64763400 |
| H  | -3.89431900 | -3.50975200 | -0.74886300 |
| C  | -2.63377100 | 4.21766000  | 2.21935900  |
| H  | -2.34669400 | 5.23441000  | 2.44399900  |
| C  | -2.19122200 | 3.48027600  | 1.05754900  |
| C  | 1.55012200  | -4.50652300 | 0.25478700  |
| H  | 1.07648100  | -5.45550300 | 0.03230500  |
| C  | 1.97919000  | -1.49239100 | 0.92393900  |
| C  | 2.07266500  | -0.26118800 | -0.01713300 |
| H  | 2.81035700  | -2.16488700 | 0.70953100  |
| H  | 1.23028600  | 0.39827800  | 0.22828800  |
| Cl | 2.81252800  | -4.24191700 | -1.10005700 |
| Cl | 2.40761300  | -4.75167800 | 1.91194900  |
| C  | 0.45253400  | -3.44479800 | 0.29804500  |

|                                     |             |             |             |
|-------------------------------------|-------------|-------------|-------------|
| O                                   | -0.69536400 | -3.86584600 | 0.00169300  |
| N                                   | 0.70126900  | -2.17066800 | 0.66191400  |
| H                                   | -0.10832500 | -1.54219600 | 0.61933100  |
| C                                   | 2.01890700  | -1.12040800 | 2.41347800  |
| O                                   | 1.89718800  | -0.80240400 | -1.36530600 |
| H                                   | 1.67374100  | -0.07621100 | -1.98130100 |
| C                                   | 3.37152900  | 0.51746300  | 0.06133900  |
| C                                   | 3.40441000  | 1.78952600  | 0.65575100  |
| C                                   | 4.54608100  | -0.00644900 | -0.50693100 |
| C                                   | 4.58717000  | 2.52407800  | 0.70727200  |
| H                                   | 2.49745600  | 2.20251000  | 1.08589900  |
| C                                   | 5.73823700  | 0.71270400  | -0.46186500 |
| H                                   | 4.51273600  | -0.97442000 | -0.99306500 |
| C                                   | 5.74277000  | 1.97145400  | 0.14824600  |
| H                                   | 4.63216600  | 3.50426400  | 1.16302000  |
| H                                   | 6.65391200  | 0.32318900  | -0.88664000 |
| N                                   | 6.98690000  | 2.73626100  | 0.19414800  |
| O                                   | 8.02393200  | 2.22643300  | -0.32288000 |
| O                                   | 6.96986000  | 3.87528200  | 0.74886400  |
| O                                   | 3.35087200  | -0.62660200 | 2.71477100  |
| H                                   | 3.45069200  | -0.46683100 | 3.67313300  |
| H                                   | 1.24921500  | -0.36352200 | 2.62547300  |
| H                                   | 1.78973400  | -2.02154700 | 2.99345600  |
| <b><sup>2</sup>TS-H<sub>3</sub></b> |             |             |             |
| Fe                                  | -2.33033628 | -0.20910169 | 0.12012723  |
| O                                   | -0.94901628 | 0.53806631  | -0.41146677 |
| S                                   | -4.58317800 | -1.44543400 | 0.79019300  |
| H                                   | -4.04544400 | -2.68755400 | 1.07761000  |
| N                                   | -2.93103000 | 1.27265800  | 1.41767700  |
| C                                   | -2.89826100 | 2.68877700  | 3.25557900  |
| C                                   | -3.62703300 | 3.30827300  | 2.28041700  |
| H                                   | -2.67016600 | 3.04317600  | 4.24999600  |
| H                                   | -4.11293600 | 4.27212800  | 2.31607300  |
| N                                   | -3.68906200 | 0.61165200  | -1.24472600 |
| C                                   | -4.35017200 | 1.83094600  | -1.14833200 |
| C                                   | -5.06819600 | 2.09958400  | -2.37554700 |
| C                                   | -4.83780200 | 1.04826600  | -3.21381900 |
| H                                   | -5.66498300 | 2.98171600  | -2.55465800 |
| H                                   | -5.20695800 | 0.89756000  | -4.21744600 |
| N                                   | -2.23844000 | -1.82663000 | -1.05665600 |
| C                                   | -2.71657000 | -1.98364300 | -2.35275200 |
| C                                   | -1.43245600 | -2.93711500 | -0.81323300 |
| C                                   | -2.22328700 | -3.22243500 | -2.91349600 |
| C                                   | -1.43059000 | -3.80598900 | -1.96900600 |
| H                                   | -2.45660900 | -3.57937100 | -3.90568900 |
| H                                   | -0.88155300 | -4.73350800 | -2.03248400 |

|    |             |             |             |
|----|-------------|-------------|-------------|
| N  | -1.47809600 | -1.17921200 | 1.59850600  |
| C  | -0.14148500 | -2.68919700 | 2.74583500  |
| H  | 0.45167400  | -3.57556800 | 2.91530700  |
| C  | -0.79493100 | -2.38031200 | 1.49292100  |
| C  | -2.47095400 | 1.41540500  | 2.71610300  |
| C  | -3.64567200 | 2.41855300  | 1.13860400  |
| C  | -3.97793400 | 0.12150100  | -2.50935300 |
| C  | -0.74764200 | -3.18715200 | 0.36159700  |
| H  | -0.12970200 | -4.07725400 | 0.41535500  |
| C  | -1.71565500 | 0.48044700  | 3.40785400  |
| H  | -1.44938000 | 0.71503700  | 4.43314700  |
| C  | -4.31637900 | 2.67459200  | -0.05256700 |
| H  | -4.86134600 | 3.60961800  | -0.12577000 |
| C  | -3.51479800 | -1.07652300 | -3.02895200 |
| H  | -3.80811300 | -1.32827100 | -4.04217000 |
| C  | -0.43197100 | -1.66680300 | 3.61021800  |
| H  | -0.12988700 | -1.55627400 | 4.64143500  |
| C  | -1.25546200 | -0.72259600 | 2.89167300  |
| C  | 3.33336187  | -2.72913942 | -2.74811002 |
| H  | 3.42121725  | -3.49977301 | -3.48520248 |
| C  | 2.18991066  | -0.75387710 | -0.58269761 |
| C  | 1.62691584  | 0.68799775  | -0.69521513 |
| H  | 3.24612025  | -0.73267745 | -0.85769906 |
| H  | 0.38895839  | 0.61931724  | -0.53633045 |
| Cl | 4.21893088  | -1.30438695 | -3.28050832 |
| C  | 1.86422235  | -2.37258999 | -2.55874920 |
| O  | 1.06866368  | -2.87601425 | -3.39653838 |
| N  | 1.44616784  | -1.57640240 | -1.55370526 |
| H  | 0.44722218  | -1.39379020 | -1.59441165 |
| C  | 2.05668580  | -1.39086945 | 0.81441880  |
| O  | 1.89826809  | 1.10338825  | -2.05461070 |
| H  | 1.30589816  | 1.87848635  | -2.25608213 |
| C  | 2.18432483  | 1.67606627  | 0.31090686  |
| C  | 1.41181531  | 2.10024895  | 1.40263891  |
| C  | 3.47279930  | 2.20817985  | 0.12945031  |
| C  | 1.91735851  | 3.01935715  | 2.31994094  |
| H  | 0.40706532  | 1.71154266  | 1.53409155  |
| C  | 3.99355804  | 3.12843119  | 1.03500975  |
| H  | 4.04832635  | 1.90631713  | -0.73777047 |
| C  | 3.20720262  | 3.51912956  | 2.12486375  |
| H  | 1.33825864  | 3.35427238  | 3.17013277  |
| H  | 4.98257848  | 3.55004542  | 0.91416660  |
| N  | 3.74394040  | 4.48647727  | 3.07858381  |
| O  | 4.91169398  | 4.93648161  | 2.88370746  |
| O  | 3.01734758  | 4.83110790  | 4.05760406  |
| O  | 2.98974144  | -0.77975180 | 1.74509683  |



|                                      |            |             |             |
|--------------------------------------|------------|-------------|-------------|
| H                                    | 3.71297991 | -1.39729640 | 1.96587152  |
| H                                    | 1.04194874 | -1.24135951 | 1.20536242  |
| H                                    | 2.23223978 | -2.46607653 | 0.71740679  |
| Cl                                   | 4.00037294 | -3.29817896 | -1.22203983 |
| <b><sup>4</sup>TS- H<sub>3</sub></b> |            |             |             |
| Fe                                   | -2.47397   | -0.21779    | 0.13379     |
| O                                    | -1.09265   | 0.52938     | -0.3978     |
| S                                    | -4.58318   | -1.44543    | 0.79019     |
| H                                    | -4.04544   | -2.68755    | 1.07761     |
| N                                    | -2.93103   | 1.27266     | 1.41768     |
| C                                    | -2.89826   | 2.68878     | 3.25558     |
| C                                    | -3.62703   | 3.30827     | 2.28042     |
| H                                    | -2.67017   | 3.04318     | 4.25        |
| H                                    | -4.11294   | 4.27213     | 2.31607     |
| N                                    | -3.68906   | 0.61165     | -1.24473    |
| C                                    | -4.35017   | 1.83095     | -1.14833    |
| C                                    | -5.0682    | 2.09958     | -2.37555    |
| C                                    | -4.8378    | 1.04827     | -3.21382    |
| H                                    | -5.66498   | 2.98172     | -2.55466    |
| H                                    | -5.20696   | 0.89756     | -4.21745    |
| N                                    | -2.23844   | -1.82663    | -1.05666    |
| C                                    | -2.71657   | -1.98364    | -2.35275    |
| C                                    | -1.43246   | -2.93712    | -0.81323    |
| C                                    | -2.22329   | -3.22243    | -2.9135     |
| C                                    | -1.43059   | -3.80599    | -1.96901    |
| H                                    | -2.45661   | -3.57937    | -3.90569    |
| H                                    | -0.88155   | -4.73351    | -2.03248    |
| N                                    | -1.4781    | -1.17921    | 1.59851     |
| C                                    | -0.14149   | -2.6892     | 2.74584     |
| H                                    | 0.45167    | -3.57557    | 2.91531     |
| C                                    | -0.79493   | -2.38031    | 1.49292     |
| C                                    | -2.47095   | 1.41541     | 2.7161      |
| C                                    | -3.64567   | 2.41855     | 1.1386      |
| C                                    | -3.97793   | 0.1215      | -2.50935    |
| C                                    | -0.74764   | -3.18715    | 0.3616      |
| H                                    | -0.1297    | -4.07725    | 0.41536     |
| C                                    | -1.71566   | 0.48045     | 3.40785     |
| H                                    | -1.44938   | 0.71504     | 4.43315     |
| C                                    | -4.31638   | 2.67459     | -0.05257    |
| H                                    | -4.86135   | 3.60962     | -0.12577    |
| C                                    | -3.5148    | -1.07652    | -3.02895    |
| H                                    | -3.80811   | -1.32827    | -4.04217    |
| C                                    | -0.43197   | -1.6668     | 3.61022     |
| H                                    | -0.12989   | -1.55627    | 4.64144     |
| C                                    | -1.25546   | -0.7226     | 2.89167     |
| C                                    | 2.40794    | -2.07913    | -4.57532    |

|    |          |          |          |
|----|----------|----------|----------|
| H  | 2.60934  | -3.05907 | -4.99229 |
| C  | 1.30851  | 0.21027  | -2.71843 |
| C  | -0.0355  | 0.98632  | -2.72173 |
| H  | 1.84335  | 0.44564  | -3.6405  |
| H  | -0.57494 | 0.81521  | -1.48873 |
| Cl | 1.88146  | -1.00577 | -6.00396 |
| Cl | 4.05652  | -1.48893 | -3.87723 |
| C  | 1.3304   | -2.23996 | -3.51024 |
| O  | 0.80656  | -3.38358 | -3.43299 |
| N  | 0.96982  | -1.22412 | -2.69977 |
| H  | 0.20495  | -1.47625 | -2.07985 |
| C  | 2.22891  | 0.51994  | -1.52159 |
| O  | -0.65885 | 0.52034  | -3.94175 |
| H  | -1.64128 | 0.65576  | -3.84815 |
| C  | -0.29888 | 2.47735  | -2.6397  |
| C  | -0.78407 | 3.05555  | -1.45697 |
| C  | -0.09655 | 3.28718  | -3.77083 |
| C  | -1.04046 | 4.42332  | -1.38465 |
| H  | -0.96565 | 2.43116  | -0.58802 |
| C  | -0.34872 | 4.65526  | -3.7173  |
| H  | 0.24021  | 2.82731  | -4.69253 |
| C  | -0.81444 | 5.20739  | -2.51853 |
| H  | -1.41017 | 4.88739  | -0.48005 |
| H  | -0.19962 | 5.29642  | -4.5759  |
| N  | -1.0847  | 6.64133  | -2.45371 |
| O  | -0.88254 | 7.33744  | -3.49231 |
| O  | -1.50856 | 7.12374  | -1.36155 |
| O  | 2.80792  | 1.84576  | -1.6526  |
| H  | 3.75942  | 1.78868  | -1.86367 |
| H  | 1.65735  | 0.49132  | -0.5849  |
| H  | 3.00137  | -0.25307 | -1.47616 |

**<sup>2</sup>INT<sub>3</sub>**

|    |            |             |             |
|----|------------|-------------|-------------|
| Fe | 2.22181400 | -0.61877000 | 0.20170000  |
| O  | 0.74188200 | 0.27624800  | -0.42305300 |
| S  | 4.16652100 | -1.66621200 | 1.00546500  |
| H  | 3.87005300 | -2.95397900 | 0.60336900  |
| N  | 3.12886200 | -0.29807200 | -1.57751500 |
| C  | 3.89883100 | -0.56076500 | -3.74535600 |
| C  | 4.43793400 | 0.59815200  | -3.26391800 |
| H  | 4.03079400 | -1.00766900 | -4.71968400 |
| H  | 5.09783500 | 1.28988800  | -3.76631200 |
| N  | 3.05928700 | 1.06177700  | 0.92383900  |
| C  | 3.89748700 | 1.93515700  | 0.24438300  |
| C  | 4.24362000 | 3.04200000  | 1.10573900  |
| C  | 3.60708600 | 2.84160000  | 2.29801500  |
| H  | 4.88544000 | 3.86152400  | 0.81781400  |

|    |             |             |             |
|----|-------------|-------------|-------------|
| H  | 3.62585700  | 3.46408300  | 3.18049400  |
| N  | 1.29163200  | -0.92222900 | 1.96121200  |
| C  | 1.34636300  | -0.10164700 | 3.07864300  |
| C  | 0.51524700  | -2.01578100 | 2.31602600  |
| C  | 0.55787800  | -0.68017700 | 4.14385900  |
| C  | 0.04662400  | -1.85820000 | 3.67450700  |
| H  | 0.44169400  | -0.24253500 | 5.12493000  |
| H  | -0.57780300 | -2.57237000 | 4.19115800  |
| N  | 1.54788800  | -2.39360800 | -0.46084000 |
| C  | 0.36525900  | -4.38010700 | -0.64368500 |
| H  | -0.29761100 | -5.18631700 | -0.36659700 |
| C  | 0.71481200  | -3.27377800 | 0.21942500  |
| C  | 3.09283100  | -1.12901900 | -2.68850100 |
| C  | 3.96772300  | 0.75793400  | -1.90668400 |
| C  | 2.86346100  | 1.60814300  | 2.18399200  |
| C  | 0.24174900  | -3.10921900 | 1.51099400  |
| H  | -0.39727200 | -3.88689900 | 1.91334000  |
| C  | 2.42234500  | -2.33765800 | -2.77234900 |
| H  | 2.46741900  | -2.87359000 | -3.71357400 |
| C  | 4.32371600  | 1.79851400  | -1.06652500 |
| H  | 4.98247700  | 2.56267400  | -1.46274000 |
| C  | 2.06707200  | 1.07618200  | 3.18497700  |
| H  | 2.01822100  | 1.61329900  | 4.12564400  |
| C  | 0.97442900  | -4.15885800 | -1.84704600 |
| H  | 0.92674800  | -4.76378400 | -2.74038400 |
| C  | 1.70381300  | -2.91670900 | -1.73925300 |
| C  | -1.72255400 | 4.07411300  | -1.70038600 |
| H  | -1.19162000 | 4.52215500  | -2.53214300 |
| C  | -2.46315200 | 2.14815600  | 0.69210800  |
| C  | -3.70430500 | 1.35871900  | 0.31579900  |
| H  | -2.79096500 | 3.18613300  | 0.76145400  |
| H  | 0.89765300  | 0.80362900  | -1.24467200 |
| Cl | -3.44987400 | 3.72891000  | -2.31610000 |
| Cl | -1.73655700 | 5.37484600  | -0.34787300 |
| C  | -0.97125800 | 2.81422300  | -1.29427400 |
| O  | 0.03861100  | 2.54697500  | -2.00355000 |
| N  | -1.33507800 | 2.03969900  | -0.24769100 |
| H  | -0.64970100 | 1.27813900  | -0.08275200 |
| C  | -1.92138100 | 1.73464100  | 2.07648400  |
| O  | -4.80667500 | 2.17879700  | 0.38283800  |
| H  | -5.62907300 | 1.76104600  | 0.06130400  |
| C  | -3.82496100 | -0.02980700 | 0.05855800  |
| C  | -2.68763200 | -0.85971200 | -0.21046900 |
| C  | -5.11059200 | -0.67127300 | 0.06628000  |
| C  | -2.82881400 | -2.21527800 | -0.44056200 |
| H  | -1.69441100 | -0.43834700 | -0.27461600 |

|                                    |             |             |             |
|------------------------------------|-------------|-------------|-------------|
| C                                  | -5.24876800 | -2.02701100 | -0.15906100 |
| H                                  | -6.00569000 | -0.11020800 | 0.31773300  |
| C                                  | -4.10376800 | -2.80528700 | -0.40736600 |
| H                                  | -1.96717100 | -2.83156100 | -0.65430800 |
| H                                  | -6.21671000 | -2.50971600 | -0.12751200 |
| N                                  | -4.23647200 | -4.22317700 | -0.60858500 |
| O                                  | -5.40678500 | -4.72672300 | -0.62887100 |
| O                                  | -3.17519000 | -4.91889400 | -0.75021600 |
| O                                  | -3.02632300 | 1.84755100  | 3.00453500  |
| H                                  | -2.78190800 | 1.47549600  | 3.87375300  |
| H                                  | -1.53387300 | 0.70837200  | 2.03597300  |
| H                                  | -1.09612400 | 2.40823900  | 2.34170900  |
| <b><sup>4</sup>INT<sub>3</sub></b> |             |             |             |
| Fe                                 | 2.22194600  | -0.61912200 | 0.20161800  |
| O                                  | 0.74256300  | 0.27726200  | -0.42288400 |
| S                                  | 4.16588600  | -1.66835200 | 1.00521300  |
| H                                  | 3.86754300  | -2.95614200 | 0.60457200  |
| N                                  | 3.12828700  | -0.30073900 | -1.57836800 |
| C                                  | 3.89699600  | -0.56609100 | -3.74634000 |
| C                                  | 4.43757300  | 0.59265200  | -3.26612000 |
| H                                  | 4.02803600  | -1.01395200 | -4.72035400 |
| H                                  | 5.09798800  | 1.28325500  | -3.76939800 |
| N                                  | 3.06173000  | 1.06098300  | 0.92204000  |
| C                                  | 3.90041400  | 1.93300100  | 0.24141500  |
| C                                  | 4.24818200  | 3.04015700  | 1.10170800  |
| C                                  | 3.61216400  | 2.84131300  | 2.29451900  |
| H                                  | 4.89067700  | 3.85879800  | 0.81277900  |
| H                                  | 3.63211000  | 3.46444700  | 3.17651300  |
| N                                  | 1.29242000  | -0.92024600 | 1.96191700  |
| C                                  | 1.34880000  | -0.09895300 | 3.07875700  |
| C                                  | 0.51503900  | -2.01265300 | 2.31799000  |
| C                                  | 0.56040000  | -0.67587400 | 4.14490400  |
| C                                  | 0.04749100  | -1.85362800 | 3.67668700  |
| H                                  | 0.44539200  | -0.23743800 | 5.12575900  |
| H                                  | -0.57737400 | -2.56676200 | 4.19424400  |
| N                                  | 1.54566800  | -2.39370700 | -0.45919300 |
| C                                  | 0.36081700  | -4.37908700 | -0.63984800 |
| H                                  | -0.30281100 | -5.18435000 | -0.36182500 |
| C                                  | 0.71196800  | -3.27242200 | 0.22218300  |
| C                                  | 3.09088400  | -1.13258400 | -2.68863800 |
| C                                  | 3.96816000  | 0.75406600  | -1.90881000 |
| C                                  | 2.86719500  | 1.60854100  | 2.18187400  |
| C                                  | 0.23977400  | -3.10633000 | 1.51388300  |
| H                                  | -0.39990600 | -3.88298500 | 1.91715900  |
| C                                  | 2.41907100  | -2.34058200 | -2.77116600 |
| H                                  | 2.46312200  | -2.87732500 | -3.71197700 |

|                                       |             |             |             |
|---------------------------------------|-------------|-------------|-------------|
| C                                     | 4.32571700  | 1.79491900  | -1.06964300 |
| H                                     | 4.98505500  | 2.55808600  | -1.46681500 |
| C                                     | 2.07086000  | 1.07816900  | 3.18375400  |
| H                                     | 2.02317500  | 1.61603800  | 4.12405000  |
| C                                     | 0.96966500  | -4.15948600 | -1.84367900 |
| H                                     | 0.92090800  | -4.76510000 | -2.73649300 |
| C                                     | 1.70043400  | -2.91803400 | -1.73725300 |
| C                                     | -1.72270700 | 4.07446600  | -1.70099000 |
| H                                     | -1.19225100 | 4.52239600  | -2.53311000 |
| C                                     | -2.46251600 | 2.14873800  | 0.69179200  |
| C                                     | -3.70403400 | 1.35935400  | 0.31651000  |
| H                                     | -2.79020000 | 3.18675700  | 0.76113700  |
| H                                     | 0.89888000  | 0.80462000  | -1.24439000 |
| Cl                                    | -3.45033900 | 3.72891800  | -2.31569600 |
| Cl                                    | -1.73616600 | 5.37548700  | -0.34874500 |
| C                                     | -0.97108900 | 2.81477800  | -1.29489600 |
| O                                     | 0.03901700  | 2.54789300  | -2.00396900 |
| N                                     | -1.33499200 | 2.03999900  | -0.24855000 |
| H                                     | -0.64956500 | 1.27846800  | -0.08364700 |
| C                                     | -1.91987800 | 1.73538000  | 2.07591300  |
| O                                     | -4.80626900 | 2.17953200  | 0.38482000  |
| H                                     | -5.62907700 | 1.76180800  | 0.06429900  |
| C                                     | -3.82516300 | -0.02907100 | 0.05905000  |
| C                                     | -2.68830300 | -0.85904400 | -0.21175500 |
| C                                     | -5.11086300 | -0.67040700 | 0.06841400  |
| C                                     | -2.82994500 | -2.21454000 | -0.44194900 |
| H                                     | -1.69514000 | -0.43771600 | -0.27716100 |
| C                                     | -5.24948900 | -2.02608000 | -0.15700200 |
| H                                     | -6.00553500 | -0.10930700 | 0.32130000  |
| C                                     | -4.10491900 | -2.80443700 | -0.40706300 |
| H                                     | -1.96868300 | -2.83086800 | -0.65709200 |
| H                                     | -6.21743300 | -2.50869500 | -0.12415600 |
| N                                     | -4.23805200 | -4.22225100 | -0.60832300 |
| O                                     | -5.40844900 | -4.72567500 | -0.62716400 |
| O                                     | -3.17701700 | -4.91809700 | -0.75133900 |
| O                                     | -3.02419400 | 1.84807800  | 3.00470300  |
| H                                     | -2.77913300 | 1.47598600  | 3.87372200  |
| H                                     | -1.53219000 | 0.70918100  | 2.03510900  |
| H                                     | -1.09456500 | 2.40912700  | 2.34058100  |
| <b><sup>2</sup>TS-reb<sub>3</sub></b> |             |             |             |
| Fe                                    | -0.07669600 | 2.04809900  | 0.19535500  |
| O                                     | -0.08530200 | 0.16594100  | -0.46073700 |
| S                                     | -0.12778400 | 4.38174800  | 0.85981800  |
| H                                     | 1.03682100  | 4.40089000  | 1.60303300  |
| N                                     | 1.54407400  | 1.73299800  | 1.34591800  |
| C                                     | 2.91980900  | 1.19447300  | 3.13028000  |

|    |             |             |             |
|----|-------------|-------------|-------------|
| C  | 3.73159300  | 1.48868000  | 2.06879900  |
| H  | 3.20585700  | 0.90169600  | 4.12995300  |
| H  | 4.81120600  | 1.48223300  | 2.03046800  |
| N  | 1.12889700  | 2.48795100  | -1.37849700 |
| C  | 2.51820700  | 2.49269700  | -1.38404600 |
| C  | 2.99580600  | 2.94661400  | -2.67042400 |
| C  | 1.89748400  | 3.24311300  | -3.42893500 |
| H  | 4.03842500  | 3.03716600  | -2.93811000 |
| H  | 1.86508900  | 3.62365100  | -4.43941000 |
| N  | -1.68724200 | 2.47724400  | -0.92675300 |
| C  | -1.69584000 | 2.94179300  | -2.23551600 |
| C  | -3.01663000 | 2.34025100  | -0.55263100 |
| C  | -3.06080900 | 3.10869500  | -2.68035800 |
| C  | -3.87222300 | 2.73243800  | -1.64760300 |
| H  | -3.34494800 | 3.45639300  | -3.66266900 |
| H  | -4.95085100 | 2.70164700  | -1.61826000 |
| N  | -1.26959300 | 1.52230200  | 1.72987900  |
| C  | -3.13752500 | 1.13870500  | 3.04477400  |
| H  | -4.18065900 | 1.05765500  | 3.31287900  |
| C  | -2.65760000 | 1.52787800  | 1.73751700  |
| C  | 1.55504900  | 1.33775200  | 2.67830200  |
| C  | 2.87501600  | 1.81921600  | 0.95341000  |
| C  | 0.73173600  | 2.97062700  | -2.61997800 |
| C  | -3.47091900 | 1.89045800  | 0.67689300  |
| H  | -4.54259600 | 1.82023000  | 0.81692100  |
| C  | 0.43586200  | 1.08589100  | 3.45827000  |
| H  | 0.59877900  | 0.79291900  | 4.48939400  |
| C  | 3.33031800  | 2.16536600  | -0.30991600 |
| H  | 4.40330500  | 2.20368400  | -0.46155700 |
| C  | -0.57830700 | 3.17730000  | -3.02150100 |
| H  | -0.74276200 | 3.55138600  | -4.02581900 |
| C  | -2.04055400 | 0.92688700  | 3.83171700  |
| H  | -2.00799400 | 0.63771700  | 4.87202200  |
| C  | -0.87383900 | 1.17595700  | 3.01401300  |
| C  | -4.06042800 | -3.17470300 | -0.57272800 |
| H  | -5.11520600 | -3.08811200 | -0.80653600 |
| C  | -1.09853600 | -2.47788500 | 0.07884500  |
| C  | 0.07215900  | -2.29938400 | -0.87012300 |
| H  | -1.45399400 | -3.50447900 | -0.08177100 |
| H  | 0.29712400  | 0.24615700  | -1.36079200 |
| Cl | -3.34493900 | -4.34619200 | -1.84619800 |
| Cl | -3.99279700 | -3.96270400 | 1.14039700  |
| C  | -3.45324800 | -1.77166600 | -0.62111800 |
| O  | -4.25244000 | -0.86658000 | -0.96417100 |
| N  | -2.16145400 | -1.54400600 | -0.30630000 |
| H  | -1.78502900 | -0.59363700 | -0.42704300 |

|                                       |             |             |             |
|---------------------------------------|-------------|-------------|-------------|
| C                                     | -0.79929900 | -2.31023900 | 1.58090100  |
| O                                     | -0.37864100 | -2.40518100 | -2.16437800 |
| H                                     | 0.32552700  | -2.25883600 | -2.82829500 |
| C                                     | 1.49191100  | -2.44902100 | -0.64205800 |
| C                                     | 2.16328000  | -1.89858600 | 0.48165600  |
| C                                     | 2.27427300  | -3.13725800 | -1.61705800 |
| C                                     | 3.53799500  | -2.01761000 | 0.61576300  |
| H                                     | 1.61252400  | -1.33949400 | 1.21863300  |
| C                                     | 3.64898900  | -3.26416800 | -1.48175300 |
| H                                     | 1.79045200  | -3.64055800 | -2.44848400 |
| C                                     | 4.27454200  | -2.69265600 | -0.36734500 |
| H                                     | 4.05317100  | -1.57918200 | 1.45894300  |
| H                                     | 4.24289900  | -3.80405400 | -2.20719500 |
| N                                     | 5.71620600  | -2.79938400 | -0.23173600 |
| O                                     | 6.35934000  | -3.41976800 | -1.13433400 |
| O                                     | 6.26510800  | -2.26327200 | 0.77976800  |
| O                                     | 0.13305100  | -3.30754200 | 2.07354500  |
| H                                     | -0.32572000 | -4.15867900 | 2.22165700  |
| H                                     | -0.35249000 | -1.33621200 | 1.76662800  |
| H                                     | -1.75356300 | -2.35568300 | 2.11427400  |
| <b><sup>4</sup>TS-reb<sub>3</sub></b> |             |             |             |
| Fe                                    | -0.07669600 | 2.04809900  | 0.19535500  |
| O                                     | -0.08530200 | 0.16594100  | -0.46073700 |
| S                                     | -0.12778400 | 4.38174800  | 0.85981800  |
| H                                     | 1.03682100  | 4.40089000  | 1.60303300  |
| N                                     | 1.54407400  | 1.73299800  | 1.34591800  |
| C                                     | 2.91980900  | 1.19447300  | 3.13028000  |
| C                                     | 3.73159300  | 1.48868000  | 2.06879900  |
| H                                     | 3.20585700  | 0.90169600  | 4.12995300  |
| H                                     | 4.81120600  | 1.48223300  | 2.03046800  |
| N                                     | 1.12889700  | 2.48795100  | -1.37849700 |
| C                                     | 2.51820700  | 2.49269700  | -1.38404600 |
| C                                     | 2.99580600  | 2.94661400  | -2.67042400 |
| C                                     | 1.89748400  | 3.24311300  | -3.42893500 |
| H                                     | 4.03842500  | 3.03716600  | -2.93811000 |
| H                                     | 1.86508900  | 3.62365100  | -4.43941000 |
| N                                     | -1.68724200 | 2.47724400  | -0.92675300 |
| C                                     | -1.69584000 | 2.94179300  | -2.23551600 |
| C                                     | -3.01663000 | 2.34025100  | -0.55263100 |
| C                                     | -3.06080900 | 3.10869500  | -2.68035800 |
| C                                     | -3.87222300 | 2.73243800  | -1.64760300 |
| H                                     | -3.34494800 | 3.45639300  | -3.66266900 |
| H                                     | -4.95085100 | 2.70164700  | -1.61826000 |
| N                                     | -1.26959300 | 1.52230200  | 1.72987900  |
| C                                     | -3.13752500 | 1.13870500  | 3.04477400  |
| H                                     | -4.18065900 | 1.05765500  | 3.31287900  |

|    |             |             |             |
|----|-------------|-------------|-------------|
| C  | -2.65760000 | 1.52787800  | 1.73751700  |
| C  | 1.55504900  | 1.33775200  | 2.67830200  |
| C  | 2.87501600  | 1.81921600  | 0.95341000  |
| C  | 0.73173600  | 2.97062700  | -2.61997800 |
| C  | -3.47091900 | 1.89045800  | 0.67689300  |
| H  | -4.54259600 | 1.82023000  | 0.81692100  |
| C  | 0.43586200  | 1.08589100  | 3.45827000  |
| H  | 0.59877900  | 0.79291900  | 4.48939400  |
| C  | 3.33031800  | 2.16536600  | -0.30991600 |
| H  | 4.40330500  | 2.20368400  | -0.46155700 |
| C  | -0.57830700 | 3.17730000  | -3.02150100 |
| H  | -0.74276200 | 3.55138600  | -4.02581900 |
| C  | -2.04055400 | 0.92688700  | 3.83171700  |
| H  | -2.00799400 | 0.63771700  | 4.87202200  |
| C  | -0.87383900 | 1.17595700  | 3.01401300  |
| C  | -4.06042800 | -3.17470300 | -0.57272800 |
| H  | -5.11520600 | -3.08811200 | -0.80653600 |
| C  | -1.09853600 | -2.47788500 | 0.07884500  |
| C  | 0.07215900  | -2.29938400 | -0.87012300 |
| H  | -1.45399400 | -3.50447900 | -0.08177100 |
| H  | 0.29712400  | 0.24615700  | -1.36079200 |
| Cl | -3.34493900 | -4.34619200 | -1.84619800 |
| Cl | -3.99279700 | -3.96270400 | 1.14039700  |
| C  | -3.45324800 | -1.77166600 | -0.62111800 |
| O  | -4.25244000 | -0.86658000 | -0.96417100 |
| N  | -2.16145400 | -1.54400600 | -0.30630000 |
| H  | -1.78502900 | -0.59363700 | -0.42704300 |
| C  | -0.79929900 | -2.31023900 | 1.58090100  |
| O  | -0.37864100 | -2.40518100 | -2.16437800 |
| H  | 0.32552700  | -2.25883600 | -2.82829500 |
| C  | 1.49191100  | -2.44902100 | -0.64205800 |
| C  | 2.16328000  | -1.89858600 | 0.48165600  |
| C  | 2.27427300  | -3.13725800 | -1.61705800 |
| C  | 3.53799500  | -2.01761000 | 0.61576300  |
| H  | 1.61252400  | -1.33949400 | 1.21863300  |
| C  | 3.64898900  | -3.26416800 | -1.48175300 |
| H  | 1.79045200  | -3.64055800 | -2.44848400 |
| C  | 4.27454200  | -2.69265600 | -0.36734500 |
| H  | 4.05317100  | -1.57918200 | 1.45894300  |
| H  | 4.24289900  | -3.80405400 | -2.20719500 |
| N  | 5.71620600  | -2.79938400 | -0.23173600 |
| O  | 6.35934000  | -3.41976800 | -1.13433400 |
| O  | 6.26510800  | -2.26327200 | 0.77976800  |
| O  | 0.13305100  | -3.30754200 | 2.07354500  |
| H  | -0.32572000 | -4.15867900 | 2.22165700  |
| H  | -0.35249000 | -1.33621200 | 1.76662800  |



|                                |             |             |             |
|--------------------------------|-------------|-------------|-------------|
| H                              | -1.75356300 | -2.35568300 | 2.11427400  |
| <sup>2</sup> P-OH <sub>3</sub> |             |             |             |
| Fe                             | -2.70170900 | -0.27105700 | -0.22603800 |
| O                              | 0.51213700  | 0.13652400  | 0.38334000  |
| S                              | -4.66094100 | -1.19973800 | -1.00323400 |
| H                              | -5.35914000 | -1.18470200 | 0.18926200  |
| N                              | -3.59025800 | 0.92224900  | 1.09319700  |
| C                              | -4.65059200 | 1.81247400  | 3.04798000  |
| C                              | -4.84230000 | 2.65920300  | 2.01053700  |
| H                              | -4.99578600 | 1.91707700  | 4.06616600  |
| H                              | -5.36482500 | 3.60393200  | 2.03780400  |
| N                              | -2.67082100 | 1.21276200  | -1.56871900 |
| C                              | -3.38292800 | 2.40668300  | -1.47984100 |
| C                              | -3.22404700 | 3.17081900  | -2.69783100 |
| C                              | -2.41264000 | 2.44446400  | -3.52368300 |
| H                              | -3.67197400 | 4.13728100  | -2.87626800 |
| H                              | -2.06949500 | 2.69614100  | -4.51632200 |
| N                              | -1.49246000 | -1.33256500 | -1.43187500 |
| C                              | -1.11119900 | -1.03506400 | -2.74502100 |
| C                              | -1.09282300 | -2.66030000 | -1.22529000 |
| C                              | -0.45584300 | -2.17245600 | -3.34001700 |
| C                              | -0.43362600 | -3.16741600 | -2.40239500 |
| H                              | -0.05285300 | -2.19110500 | -4.34196400 |
| H                              | 0.01074000  | -4.14830300 | -2.47161400 |
| N                              | -2.39597400 | -1.59259200 | 1.25108600  |
| C                              | -1.88218200 | -3.56809300 | 2.36984800  |
| H                              | -1.49466500 | -4.56458700 | 2.52371400  |
| C                              | -1.82642100 | -2.85644400 | 1.11311400  |
| C                              | -3.87640100 | 0.69102400  | 2.46001600  |
| C                              | -4.19019800 | 2.13871900  | 0.82242000  |
| C                              | -2.08718600 | 1.21641700  | -2.83244100 |
| C                              | -1.24029200 | -3.35955700 | -0.04015600 |
| H                              | -0.81955000 | -4.35744100 | 0.00049500  |
| C                              | -3.49843700 | -0.45185700 | 3.15048100  |
| H                              | -3.76988600 | -0.52455000 | 4.19775100  |
| C                              | -4.11600000 | 2.82356700  | -0.37979200 |
| H                              | -4.63279300 | 3.77578700  | -0.44985600 |
| C                              | -1.35424900 | 0.17227400  | -3.38075900 |
| H                              | -0.99459200 | 0.28979800  | -4.39743800 |
| C                              | -2.49198900 | -2.74478100 | 3.27356400  |
| H                              | -2.70888900 | -2.93645400 | 4.31418700  |
| C                              | -2.82580500 | -1.52272900 | 2.58018000  |
| C                              | 4.12176900  | -3.42440500 | -0.29949800 |
| H                              | 4.30574200  | -4.44065500 | -0.62806400 |
| C                              | 2.69334100  | -0.85972200 | 0.78943200  |
| C                              | 1.90074900  | 0.20082900  | -0.03901500 |

|                                     |             |             |             |
|-------------------------------------|-------------|-------------|-------------|
| H                                   | 3.73266600  | -0.84655400 | 0.46441400  |
| H                                   | -0.03553700 | -0.37605600 | -0.26171800 |
| Cl                                  | 4.75919100  | -2.32692500 | -1.67114800 |
| Cl                                  | 5.14610300  | -3.19421900 | 1.25607300  |
| C                                   | 2.62514500  | -3.28821500 | -0.03922000 |
| O                                   | 1.93063000  | -4.29357600 | -0.32686700 |
| N                                   | 2.09841100  | -2.17427200 | 0.52138600  |
| H                                   | 1.09416200  | -2.22564600 | 0.66502900  |
| C                                   | 2.64453900  | -0.60413800 | 2.30077900  |
| O                                   | 2.01135300  | -0.23757200 | -1.40781500 |
| H                                   | 1.69350200  | 0.46128500  | -2.01704600 |
| C                                   | 2.42135800  | 1.62996400  | 0.10724100  |
| C                                   | 1.66623500  | 2.61203500  | 0.76565800  |
| C                                   | 3.65807800  | 1.97117800  | -0.46542200 |
| C                                   | 2.14219800  | 3.91654300  | 0.87072700  |
| H                                   | 0.71460600  | 2.33164100  | 1.18122900  |
| C                                   | 4.14429400  | 3.27360800  | -0.37384600 |
| H                                   | 4.23772100  | 1.21625500  | -0.98466000 |
| C                                   | 3.37852000  | 4.22931100  | 0.29930900  |
| H                                   | 1.57751200  | 4.68897100  | 1.37520300  |
| H                                   | 5.09413900  | 3.55716200  | -0.80663400 |
| N                                   | 3.87884600  | 5.60165000  | 0.39978100  |
| O                                   | 4.98821500  | 5.87829100  | -0.14194900 |
| O                                   | 3.17361700  | 6.44987500  | 1.02035000  |
| O                                   | 3.48229900  | 0.55070900  | 2.57270600  |
| H                                   | 3.31445900  | 0.89851700  | 3.46968500  |
| H                                   | 1.60374200  | -0.44000000 | 2.60787900  |
| H                                   | 3.03385900  | -1.49333900 | 2.80932500  |
| <b><sup>4</sup>P-OH<sub>3</sub></b> |             |             |             |
| Fe                                  | -2.23725000 | -1.06841900 | 0.03908500  |
| O                                   | 0.35654400  | -0.00249300 | -0.44504300 |
| S                                   | -4.17681700 | -2.41168800 | 0.18600700  |
| H                                   | -4.91712400 | -1.63049800 | 1.05318100  |
| N                                   | -2.89103300 | 0.36034100  | 1.30218900  |
| C                                   | -3.55328900 | 1.46105100  | 3.22555100  |
| C                                   | -4.05837600 | 2.16128400  | 2.16454500  |
| H                                   | -3.65280300 | 1.68574600  | 4.27759200  |
| H                                   | -4.65005200 | 3.06495100  | 2.18567100  |
| N                                   | -2.77818600 | 0.12303400  | -1.58485900 |
| C                                   | -3.50128200 | 1.30043700  | -1.52364200 |
| C                                   | -3.81187700 | 1.74447300  | -2.86997800 |
| C                                   | -3.29050500 | 0.81646300  | -3.73049800 |
| H                                   | -4.36627100 | 2.63912500  | -3.11389400 |
| H                                   | -3.33907200 | 0.81060200  | -4.80983500 |
| N                                   | -1.25928700 | -2.31731900 | -1.24560300 |
| C                                   | -1.42047500 | -2.34990900 | -2.63232100 |

|    |             |             |             |
|----|-------------|-------------|-------------|
| C  | -0.52681900 | -3.45534000 | -0.89916700 |
| C  | -0.77152000 | -3.53303700 | -3.15551300 |
| C  | -0.21986200 | -4.20403200 | -2.09830900 |
| H  | -0.73411800 | -3.79892000 | -4.20186400 |
| H  | 0.35955200  | -5.11504300 | -2.11720700 |
| N  | -1.18023000 | -1.95395600 | 1.62696600  |
| C  | 0.00756200  | -3.47729500 | 2.90119200  |
| H  | 0.62803100  | -4.32938800 | 3.13789600  |
| C  | -0.39872900 | -3.09377900 | 1.56122200  |
| C  | -2.81332700 | 0.33552300  | 2.69216200  |
| C  | -3.64236800 | 1.48004700  | 0.95518400  |
| C  | -2.65063100 | -0.20521800 | -2.92202500 |
| C  | -0.10355600 | -3.78797600 | 0.38622000  |
| H  | 0.52164800  | -4.66906600 | 0.47698600  |
| C  | -2.08066700 | -0.57459000 | 3.45153000  |
| H  | -2.11148600 | -0.44305500 | 4.52855600  |
| C  | -3.90757000 | 1.91690000  | -0.34196000 |
| H  | -4.49116800 | 2.82702500  | -0.43688300 |
| C  | -2.04018800 | -1.36481900 | -3.39845500 |
| H  | -2.04696200 | -1.51869500 | -4.47280000 |
| C  | -0.55586200 | -2.57764600 | 3.76561300  |
| H  | -0.48435500 | -2.55846100 | 4.84358100  |
| C  | -1.30890200 | -1.62904700 | 2.96523800  |
| C  | 5.05493300  | -1.91338100 | -0.24009200 |
| H  | 5.63366500  | -2.81231400 | -0.41858800 |
| C  | 2.65671900  | 0.02990400  | 0.38949300  |
| C  | 1.63398200  | 0.66144400  | -0.60792900 |
| H  | 3.64857200  | 0.40777400  | 0.14540100  |
| H  | 0.27725600  | -0.78711300 | -1.03114300 |
| Cl | 5.39731700  | -0.78592000 | -1.68646700 |
| Cl | 5.73694300  | -1.17477900 | 1.34737600  |
| C  | 3.59229600  | -2.32753600 | -0.09864600 |
| O  | 3.34818600  | -3.56943800 | -0.25571100 |
| N  | 2.62034500  | -1.42690200 | 0.22481200  |
| H  | 1.70711400  | -1.85187100 | 0.35440000  |
| C  | 2.35548700  | 0.36638900  | 1.85668600  |
| O  | 2.15935800  | 0.36582700  | -1.91716700 |
| H  | 1.68209200  | 0.88856500  | -2.59556800 |
| C  | 1.41314500  | 2.15502000  | -0.43588900 |
| C  | 0.23061500  | 2.64872200  | 0.13634300  |
| C  | 2.40144200  | 3.04924600  | -0.88127600 |
| C  | 0.03746700  | 4.02308600  | 0.27129000  |
| H  | -0.53250800 | 1.95504600  | 0.46365900  |
| C  | 2.21875000  | 4.42439800  | -0.75329100 |
| H  | 3.31290800  | 2.66623200  | -1.32562000 |
| C  | 1.03570900  | 4.89236800  | -0.17488000 |

|   |             |             |             |
|---|-------------|-------------|-------------|
| H | -0.86683600 | 4.42572400  | 0.70765700  |
| H | 2.96745900  | 5.13054400  | -1.08638900 |
| N | 0.83441500  | 6.33586600  | -0.03713500 |
| O | 1.74304700  | 7.10896300  | -0.45841800 |
| O | -0.23950600 | 6.74062800  | 0.49716800  |
| O | 2.77666400  | 1.73896100  | 2.07360500  |
| H | 2.48490400  | 2.05858300  | 2.94898300  |
| H | 1.28522600  | 0.22871500  | 2.06060400  |
| H | 2.92913100  | -0.32232400 | 2.48739900  |

### C-H hydroxylation through Path E

#### <sup>2</sup>RC<sub>4</sub>

|    |             |             |             |
|----|-------------|-------------|-------------|
| Fe | -3.40159000 | -0.21916700 | -0.08675100 |
| O  | -2.05815700 | -0.49923800 | 0.84187500  |
| S  | -5.27659700 | 0.06403800  | -1.80432300 |
| H  | -5.93326600 | -1.13244300 | -1.58349600 |
| N  | -4.58247400 | -1.44183400 | 0.99858400  |
| C  | -5.56039100 | -3.33737700 | 1.91076900  |
| C  | -5.91189400 | -2.28275900 | 2.70460700  |
| H  | -5.83030000 | -4.37757500 | 2.01866600  |
| H  | -6.52748500 | -2.28730100 | 3.59203100  |
| N  | -4.03647300 | 1.35276700  | 0.99295300  |
| C  | -4.83316100 | 1.31526900  | 2.12427000  |
| C  | -4.99003100 | 2.64768700  | 2.66483300  |
| C  | -4.28790600 | 3.49187200  | 1.85273600  |
| H  | -5.56751400 | 2.88898500  | 3.54500700  |
| H  | -4.17415100 | 4.56270200  | 1.93490800  |
| N  | -2.44697500 | 1.03486300  | -1.34590900 |
| C  | -2.32066100 | 2.41179100  | -1.21339700 |
| C  | -1.69338000 | 0.68999400  | -2.45610600 |
| C  | -1.47977100 | 2.93423200  | -2.26829300 |
| C  | -1.08858000 | 1.87173400  | -3.03106600 |
| H  | -1.22935400 | 3.97724100  | -2.39292000 |
| H  | -0.45410600 | 1.87142200  | -3.90472500 |
| N  | -3.00802900 | -1.75160900 | -1.34938500 |
| C  | -2.03712300 | -3.05230500 | -3.01143100 |
| H  | -1.44651300 | -3.29599300 | -3.88211600 |
| C  | -2.17005900 | -1.72237500 | -2.46048400 |
| C  | -4.72891300 | -2.81026400 | 0.85166600  |
| C  | -5.29783100 | -1.10330400 | 2.13701000  |
| C  | -3.69481200 | 2.67993600  | 0.81291800  |
| C  | -1.55043300 | -0.59276400 | -2.96351200 |
| H  | -0.91424700 | -0.71679000 | -3.83284500 |
| C  | -4.16877000 | -3.57441100 | -0.16527800 |
| H  | -4.36823200 | -4.64063200 | -0.15418000 |

|                                   |             |             |             |
|-----------------------------------|-------------|-------------|-------------|
| C                                 | -5.41618200 | 0.17562000  | 2.65802600  |
| H                                 | -6.01604000 | 0.29545200  | 3.55392300  |
| C                                 | -2.90255900 | 3.17428400  | -0.21570300 |
| H                                 | -2.71996900 | 4.24336800  | -0.23418600 |
| C                                 | -2.77956600 | -3.89009300 | -2.23088500 |
| H                                 | -2.91694300 | -4.95630900 | -2.33500600 |
| C                                 | -3.37402400 | -3.08643900 | -1.18635700 |
| C                                 | 3.95988800  | 2.93875200  | -0.79478600 |
| H                                 | 4.42667400  | 3.88424100  | -1.04560800 |
| C                                 | 2.66135100  | 0.57971200  | 0.82992800  |
| C                                 | 3.19646700  | -0.64174400 | 1.62364200  |
| H                                 | 2.90629300  | 0.44663400  | -0.22445200 |
| Cl                                | 5.05235000  | 1.61421300  | -1.54455100 |
| Cl                                | 2.28211200  | 2.95446800  | -1.63567700 |
| C                                 | 3.87309000  | 2.85269800  | 0.72573600  |
| O                                 | 4.37077300  | 3.81942800  | 1.34923400  |
| N                                 | 3.29704100  | 1.79619300  | 1.34832300  |
| H                                 | 3.32741600  | 1.83825700  | 2.36282300  |
| C                                 | 1.13152400  | 0.65562800  | 0.96830000  |
| O                                 | 3.13474900  | -0.22413600 | 3.02634200  |
| H                                 | 3.17215000  | -0.99525300 | 3.62330300  |
| C                                 | 4.59055100  | -1.08065800 | 1.22657100  |
| C                                 | 4.75134100  | -1.95443100 | 0.13533400  |
| C                                 | 5.72668000  | -0.62534200 | 1.91576500  |
| C                                 | 6.02008400  | -2.36193700 | -0.27080300 |
| H                                 | 3.87608200  | -2.31498800 | -0.39658100 |
| C                                 | 7.00383300  | -1.02563400 | 1.52234600  |
| H                                 | 5.60090700  | 0.03766300  | 2.76266500  |
| C                                 | 7.13261900  | -1.88981700 | 0.43247900  |
| H                                 | 6.16282700  | -3.03438300 | -1.10620100 |
| H                                 | 7.89057800  | -0.68230500 | 2.03859000  |
| N                                 | 8.46847300  | -2.32010200 | 0.01893100  |
| O                                 | 9.46353300  | -1.89166100 | 0.67264000  |
| O                                 | 8.56381100  | -3.10158300 | -0.97229400 |
| O                                 | 0.61947200  | -0.58152500 | 0.42937200  |
| H                                 | -0.36010800 | -0.64654900 | 0.57961000  |
| H                                 | 0.86886100  | 0.77805600  | 2.02791800  |
| H                                 | 0.76402800  | 1.52472300  | 0.41089100  |
| H                                 | 2.48076400  | -1.44964300 | 1.43572200  |
| <b><sup>4</sup>RC<sub>4</sub></b> |             |             |             |
| Fe                                | -3.31765300 | -0.24715300 | -0.13676900 |
| O                                 | -2.19256500 | -0.26628400 | 1.08225500  |
| S                                 | -4.99511600 | -0.48829800 | -2.03731600 |
| H                                 | -6.14350100 | -0.62351800 | -1.27977200 |
| N                                 | -4.77580700 | 0.48443800  | 1.05264600  |
| C                                 | -6.43997000 | 0.65852700  | 2.65914800  |

|    |             |             |             |
|----|-------------|-------------|-------------|
| C  | -6.05750900 | 1.93012600  | 2.33788000  |
| H  | -7.19183600 | 0.34283100  | 3.36735000  |
| H  | -6.43384100 | 2.86314100  | 2.73076200  |
| N  | -2.84263400 | 1.62791500  | -0.70345500 |
| C  | -3.35380100 | 2.80596000  | -0.18603900 |
| C  | -2.69330300 | 3.94126100  | -0.79225400 |
| C  | -1.78408300 | 3.44461500  | -1.68213400 |
| H  | -2.90980600 | 4.97353300  | -0.56012300 |
| H  | -1.10653700 | 3.98808200  | -2.32382900 |
| N  | -2.05645900 | -0.97991400 | -1.52471000 |
| C  | -1.19675100 | -0.25224600 | -2.33799900 |
| C  | -1.78602000 | -2.31377700 | -1.78630200 |
| C  | -0.38395900 | -1.15126700 | -3.12666300 |
| C  | -0.74351200 | -2.42174200 | -2.78320400 |
| H  | 0.36124900  | -0.83405500 | -3.84094400 |
| H  | -0.35475000 | -3.35489600 | -3.16320900 |
| N  | -3.99376500 | -2.11594300 | 0.21327300  |
| C  | -4.14940700 | -4.43217200 | 0.30093900  |
| H  | -3.93169300 | -5.46477100 | 0.07123400  |
| C  | -3.46443400 | -3.30220700 | -0.28551300 |
| C  | -5.63736700 | -0.23864400 | 1.85825500  |
| C  | -5.01719100 | 1.81926700  | 1.34008600  |
| C  | -1.88175400 | 2.00205000  | -1.62275300 |
| C  | -2.42926900 | -3.39263000 | -1.19901600 |
| H  | -2.10859500 | -4.38582900 | -1.49403500 |
| C  | -5.73399900 | -1.62494100 | 1.88889800  |
| H  | -6.45927300 | -2.05889800 | 2.56883700  |
| C  | -4.36247200 | 2.89553600  | 0.76153600  |
| H  | -4.66246400 | 3.88920000  | 1.07699300  |
| C  | -1.11934400 | 1.12808700  | -2.38853200 |
| H  | -0.39812600 | 1.56316900  | -3.07144400 |
| C  | -5.08273700 | -3.93604600 | 1.16428400  |
| H  | -5.77991300 | -4.48171000 | 1.78297500  |
| C  | -4.98032300 | -2.49469600 | 1.12274200  |
| C  | 3.83583800  | 3.04100200  | -0.66543300 |
| H  | 4.31908000  | 3.96826300  | -0.95081600 |
| C  | 2.58718800  | 0.72019700  | 1.05409900  |
| C  | 3.15055200  | -0.51065100 | 1.81492100  |
| H  | 2.75553900  | 0.57844700  | -0.01411400 |
| Cl | 4.81251700  | 1.67613200  | -1.49504200 |
| Cl | 2.10070000  | 3.13217600  | -1.38140900 |
| C  | 3.85245600  | 2.95767100  | 0.85774500  |
| O  | 4.42604000  | 3.90757600  | 1.44021400  |
| N  | 3.28472600  | 1.92296200  | 1.52221500  |
| H  | 3.38688700  | 1.96463600  | 2.53215300  |
| C  | 1.07238900  | 0.82944000  | 1.29807500  |

|                                     |             |             |             |
|-------------------------------------|-------------|-------------|-------------|
| O                                   | 3.21603200  | -0.08001500 | 3.21330700  |
| H                                   | 3.26773500  | -0.84685600 | 3.81455700  |
| C                                   | 4.49392200  | -0.99244800 | 1.30815900  |
| C                                   | 4.53675500  | -1.88331200 | 0.21966000  |
| C                                   | 5.69660100  | -0.55988100 | 1.89063700  |
| C                                   | 5.75447000  | -2.33106200 | -0.28755400 |
| H                                   | 3.60930000  | -2.22483900 | -0.23010200 |
| C                                   | 6.92408400  | -1.00063100 | 1.39514600  |
| H                                   | 5.66151300  | 0.11650000  | 2.73554400  |
| C                                   | 6.93546600  | -1.88146400 | 0.31106800  |
| H                                   | 5.80727300  | -3.01731400 | -1.12226200 |
| H                                   | 7.86091300  | -0.67617900 | 1.82848900  |
| N                                   | 8.21880900  | -2.35378200 | -0.20957000 |
| O                                   | 9.27751000  | -1.94624900 | 0.35061300  |
| O                                   | 8.20718200  | -3.14841500 | -1.19485200 |
| O                                   | 0.50558900  | -0.41050700 | 0.82466400  |
| H                                   | -0.47860800 | -0.42706600 | 0.95955300  |
| H                                   | 0.88726000  | 0.97991700  | 2.37051800  |
| H                                   | 0.68085500  | 1.69281900  | 0.74799400  |
| H                                   | 2.39998700  | -1.29921000 | 1.69468100  |
| <b><sup>2</sup>TS-H<sub>4</sub></b> |             |             |             |
| Fe                                  | -2.40644900 | -0.78931000 | 0.21847700  |
| O                                   | -1.17420800 | 0.07992000  | -0.71239300 |
| S                                   | -4.21596300 | -1.73401900 | 1.44848600  |
| H                                   | -4.98080200 | -2.14746900 | 0.37619200  |
| N                                   | -2.92040200 | -1.91541400 | -1.37654100 |
| C                                   | -3.84716500 | -2.62831300 | -3.37600300 |
| C                                   | -2.97758200 | -3.59816300 | -2.96673000 |
| H                                   | -4.46027000 | -2.60893400 | -4.26493200 |
| H                                   | -2.73968600 | -4.53370500 | -3.45130200 |
| N                                   | -1.17054600 | -2.24852900 | 0.85950400  |
| C                                   | -0.91356100 | -3.45474200 | 0.21678700  |
| C                                   | -0.02506800 | -4.25812100 | 1.02645600  |
| C                                   | 0.22845300  | -3.55367600 | 2.17013600  |
| H                                   | 0.32880700  | -5.24174700 | 0.75373500  |
| H                                   | 0.83148700  | -3.84724100 | 3.01722100  |
| N                                   | -2.00686400 | 0.25539200  | 1.88775200  |
| C                                   | -1.18528300 | -0.11556700 | 2.94150200  |
| C                                   | -2.47088700 | 1.52908000  | 2.18172600  |
| C                                   | -1.12626800 | 0.95628900  | 3.91192100  |
| C                                   | -1.91132200 | 1.97108100  | 3.43904900  |
| H                                   | -0.55841900 | 0.92094900  | 4.83030100  |
| H                                   | -2.10281200 | 2.93521600  | 3.88507000  |
| N                                   | -3.67773700 | 0.65147000  | -0.40879300 |
| C                                   | -4.83919800 | 2.64690300  | -0.56953500 |
| H                                   | -5.17850200 | 3.63742600  | -0.30502800 |

|    |             |             |             |
|----|-------------|-------------|-------------|
| C  | -3.90023800 | 1.86739200  | 0.21115900  |
| C  | -3.80492700 | -1.57199400 | -2.38805800 |
| C  | -2.39711800 | -3.15054800 | -1.71924600 |
| C  | -0.49187700 | -2.30467400 | 2.07122100  |
| C  | -3.33314200 | 2.28347000  | 1.40336700  |
| H  | -3.58137500 | 3.27647900  | 1.75850500  |
| C  | -4.52439800 | -0.39061100 | -2.47006000 |
| H  | -5.17910000 | -0.26046600 | -3.32441300 |
| C  | -1.45916300 | -3.86385100 | -0.98878300 |
| H  | -1.15569700 | -4.83155700 | -1.37298500 |
| C  | -0.48904800 | -1.31192700 | 3.03883200  |
| H  | 0.09415200  | -1.48373200 | 3.93705100  |
| C  | -5.18451100 | 1.89182600  | -1.65200000 |
| H  | -5.86278800 | 2.13987000  | -2.45499500 |
| C  | -4.45334900 | 0.64444000  | -1.55172800 |
| C  | 0.23927679  | 4.46571526  | -0.81250855 |
| H  | -0.47563371 | 5.18621463  | -0.43238486 |
| C  | 1.84080100  | 1.28017000  | 0.13841500  |
| C  | 3.05631700  | 1.18654300  | 1.12297400  |
| H  | 2.19836100  | 1.68571500  | -0.80774700 |
| Cl | 1.80937682  | 5.44100095  | -1.11952382 |
| Cl | -0.47103726 | 3.83698280  | -2.41857010 |
| C  | 0.37621200  | 3.37645900  | 0.24829400  |
| O  | -0.41480200 | 4.08010100  | 0.91622600  |
| N  | 0.84533400  | 2.18679500  | 0.71035800  |
| H  | 0.48542600  | 1.95627500  | 1.63222700  |
| C  | 1.25031000  | -0.09879300 | -0.12251400 |
| O  | 3.47734500  | 2.56133700  | 1.32504200  |
| H  | 4.24767200  | 2.59801400  | 1.92802500  |
| C  | 4.42335136  | 0.53916273  | 1.22536467  |
| C  | 4.62009011  | -0.58801312 | 2.04057227  |
| C  | 5.51117029  | 1.07333456  | 0.51156022  |
| C  | 5.87398989  | -1.19058159 | 2.13533523  |
| H  | 3.78880226  | -0.99717461 | 2.60717842  |
| C  | 6.77118168  | 0.48293861  | 0.59663006  |
| H  | 5.36230014  | 1.95303613  | -0.10416981 |
| C  | 6.93321259  | -0.64445358 | 1.40786121  |
| H  | 6.04565751  | -2.05821847 | 2.75872995  |
| H  | 7.61973409  | 0.87403608  | 0.05096769  |
| N  | 8.25414408  | -1.27083049 | 1.50370492  |
| O  | 9.20616824  | -0.75636848 | 0.85012052  |
| O  | 8.37421581  | -2.29604696 | 2.23587420  |
| O  | 1.93829200  | -0.73079400 | -1.16153900 |
| H  | 1.63416600  | -1.65158600 | -1.29863300 |
| H  | 1.10329300  | -0.72663500 | 0.76232100  |
| H  | 2.67968600  | 0.76499300  | 2.06971900  |



|                                 |             |             |             |
|---------------------------------|-------------|-------------|-------------|
| H                               | -0.13258400 | 0.00314100  | -0.45896800 |
| <sup>4</sup> TS- H <sub>4</sub> |             |             |             |
| Fe                              | -2.46251000 | -0.74203400 | 0.19552200  |
| O                               | -1.17852000 | 0.00043200  | -0.76682100 |
| S                               | -4.04588300 | -1.71063100 | 1.72084600  |
| H                               | -4.55871800 | -2.68795000 | 0.88777300  |
| N                               | -3.19895800 | -1.81596900 | -1.30408100 |
| C                               | -4.38202800 | -2.46030500 | -3.19402100 |
| C                               | -3.49639100 | -3.46095100 | -2.91483500 |
| H                               | -5.09570700 | -2.40394900 | -4.00279100 |
| H                               | -3.34563800 | -4.38913000 | -3.44646200 |
| N                               | -1.25761700 | -2.31402100 | 0.73101600  |
| C                               | -1.07885500 | -3.48638000 | 0.01679100  |
| C                               | -0.14134800 | -4.34741600 | 0.70881400  |
| C                               | 0.21938600  | -3.70312000 | 1.85963400  |
| H                               | 0.16629400  | -5.32408900 | 0.36412000  |
| H                               | 0.88617800  | -4.04738700 | 2.63697700  |
| N                               | -1.82690500 | 0.23696600  | 1.85963200  |
| C                               | -0.96398500 | -0.22170800 | 2.84399700  |
| C                               | -2.13206400 | 1.54365300  | 2.18783100  |
| C                               | -0.73057400 | 0.82805800  | 3.81308900  |
| C                               | -1.44203300 | 1.92224200  | 3.39883900  |
| H                               | -0.10327500 | 0.72974100  | 4.68723700  |
| H                               | -1.51032600 | 2.89404400  | 3.86247200  |
| N                               | -3.65254700 | 0.77654600  | -0.28439100 |
| C                               | -4.65601000 | 2.86766600  | -0.33086800 |
| H                               | -4.87383400 | 3.88589600  | -0.04438400 |
| C                               | -3.69782800 | 2.01418800  | 0.34386900  |
| C                               | -4.18413400 | -1.42573400 | -2.20292400 |
| C                               | -2.75398000 | -3.06140600 | -1.73896100 |
| C                               | -0.47861800 | -2.43491100 | 1.87494700  |
| C                               | -2.98501400 | 2.37585500  | 1.47377100  |
| H                               | -3.11351100 | 3.38465000  | 1.84698600  |
| C                               | -4.83547500 | -0.20269400 | -2.19928800 |
| H                               | -5.58043400 | -0.02862000 | -2.96797400 |
| C                               | -1.75872600 | -3.82169100 | -1.14732000 |
| H                               | -1.52284000 | -4.77566500 | -1.60683100 |
| C                               | -0.35315500 | -1.47007300 | 2.86334700  |
| H                               | 0.28820100  | -1.69898600 | 3.70834000  |
| C                               | -5.19906700 | 2.13761100  | -1.34678300 |
| H                               | -5.95117500 | 2.43735600  | -2.06165300 |
| C                               | -4.56767000 | 0.83281000  | -1.31593000 |
| C                               | 0.43149795  | 3.87296281  | -0.89807419 |
| H                               | -0.23018298 | 4.72309906  | -1.01784885 |
| C                               | 1.75991035  | 1.27696365  | 0.26861297  |
| C                               | 2.94866146  | 1.22584351  | 1.28157968  |

|                                    |             |             |             |
|------------------------------------|-------------|-------------|-------------|
| H                                  | 2.10894920  | 1.75228618  | -0.64796258 |
| Cl                                 | 2.09667798  | 4.31163313  | -1.26186505 |
| Cl                                 | 0.28962459  | 2.85435616  | -2.28919332 |
| C                                  | 0.08130006  | 3.21726642  | 0.43399505  |
| O                                  | -0.81541155 | 3.78591446  | 1.10256277  |
| N                                  | 0.68482119  | 2.08000811  | 0.86276533  |
| H                                  | 0.30349133  | 1.74719928  | 1.74405465  |
| C                                  | 1.26985400  | -0.12897300 | -0.07334500 |
| O                                  | 3.26462439  | 2.61397126  | 1.57256750  |
| H                                  | 4.00646065  | 2.66770978  | 2.20882844  |
| C                                  | 4.16484792  | 0.48572214  | 0.75946102  |
| C                                  | 4.47327723  | -0.80445908 | 1.22079721  |
| C                                  | 5.00699111  | 1.10007575  | -0.18496418 |
| C                                  | 5.59108909  | -1.48633454 | 0.74147423  |
| H                                  | 3.83718451  | -1.27868916 | 1.96194194  |
| C                                  | 6.12808360  | 0.43243051  | -0.67363519 |
| H                                  | 4.77949758  | 2.10347014  | -0.52613623 |
| C                                  | 6.40300115  | -0.85547399 | -0.20347780 |
| H                                  | 5.84597281  | -2.47996762 | 1.08564790  |
| H                                  | 6.78445982  | 0.88489657  | -1.40503480 |
| N                                  | 7.57965298  | -1.56404238 | -0.71133307 |
| O                                  | 8.31142984  | -0.97447371 | -1.55733481 |
| O                                  | 7.80477690  | -2.73193527 | -0.27835741 |
| O                                  | 2.64226531  | -0.46702498 | -0.10091627 |
| H                                  | 2.76618881  | -1.43179226 | -0.20575085 |
| H                                  | 1.17426300  | -0.69372800 | 0.86437900  |
| H                                  | 2.58360558  | 0.72307596  | 2.19250262  |
| H                                  | -0.02299700 | -0.06064200 | -0.43953100 |
| <b><sup>2</sup>INT<sub>4</sub></b> |             |             |             |
| Fe                                 | -2.70560700 | -0.64749100 | 0.22568100  |
| O                                  | -1.47206200 | 0.07372100  | -0.87269700 |
| S                                  | -4.33735000 | -1.54386100 | 1.72094000  |
| H                                  | -5.42035900 | -1.42665400 | 0.87275500  |
| N                                  | -3.62970800 | -1.58211500 | -1.29754400 |
| C                                  | -4.94326700 | -2.02392200 | -3.15264800 |
| C                                  | -4.16467500 | -3.12505300 | -2.93964100 |
| H                                  | -5.67794600 | -1.86150100 | -3.92763300 |
| H                                  | -4.13606900 | -4.04578800 | -3.50364500 |
| N                                  | -1.58913600 | -2.29945700 | 0.58296700  |
| C                                  | -1.61525200 | -3.47763100 | -0.15112600 |
| C                                  | -0.70473500 | -4.43515000 | 0.43425900  |
| C                                  | -0.14833200 | -3.84418700 | 1.53454200  |
| H                                  | -0.53887000 | -5.43258500 | 0.05391000  |
| H                                  | 0.56196200  | -4.26379800 | 2.23232700  |
| N                                  | -1.86802500 | 0.22322700  | 1.84488900  |
| C                                  | -0.92385300 | -0.31646200 | 2.70429000  |

|    |             |             |             |
|----|-------------|-------------|-------------|
| C  | -2.10306500 | 1.51856700  | 2.28020000  |
| C  | -0.54926700 | 0.67181600  | 3.69339300  |
| C  | -1.27170600 | 1.80341400  | 3.42682600  |
| H  | 0.15908100  | 0.50231100  | 4.49170600  |
| H  | -1.25564500 | 2.74928300  | 3.94694200  |
| N  | -3.88154600 | 0.95521800  | -0.06113400 |
| C  | -4.76151600 | 3.09232800  | 0.07938500  |
| H  | -4.91083000 | 4.09694300  | 0.44640700  |
| C  | -3.82423900 | 2.14680000  | 0.64545900  |
| C  | -4.60468800 | -1.05705200 | -2.13094900 |
| C  | -3.34121200 | -2.84846200 | -1.78265900 |
| C  | -0.70568300 | -2.51388500 | 1.63273700  |
| C  | -2.99919300 | 2.41558800  | 1.72301300  |
| H  | -3.05260600 | 3.40444900  | 2.16219000  |
| C  | -5.17106900 | 0.20178200  | -2.02016600 |
| H  | -5.92678600 | 0.48117400  | -2.74542700 |
| C  | -2.41000200 | -3.72868200 | -1.25781900 |
| H  | -2.31025100 | -4.69640900 | -1.73683100 |
| C  | -0.39048300 | -1.59470500 | 2.62193800  |
| H  | 0.31920800  | -1.89644900 | 3.38464500  |
| C  | -5.37893500 | 2.46987100  | -0.96690700 |
| H  | -6.13562700 | 2.86302300  | -1.62983800 |
| C  | -4.82160300 | 1.13725700  | -1.05955400 |
| C  | 1.07618400  | 3.63360800  | -1.31317600 |
| H  | 0.47827500  | 4.51105700  | -1.53071700 |
| C  | 2.23281200  | 1.10287100  | 0.10223000  |
| C  | 3.38403600  | 1.01918200  | 1.15554500  |
| H  | 2.65423600  | 1.51903600  | -0.81322100 |
| Cl | 2.86223500  | 4.20843300  | -1.42195700 |
| Cl | 0.69917500  | 2.39599700  | -2.65666900 |
| C  | 0.69941200  | 3.16273900  | 0.08789400  |
| O  | -0.10324100 | 3.89119300  | 0.71434900  |
| N  | 1.19158600  | 2.00939900  | 0.61210100  |
| H  | 0.85210700  | 1.83063600  | 1.55322800  |
| C  | 1.66197400  | -0.24845800 | -0.21769900 |
| O  | 3.78142000  | 2.39344100  | 1.40466900  |
| H  | 4.52331500  | 2.42597600  | 2.04237300  |
| C  | 4.54831600  | 0.17545800  | 0.67283200  |
| C  | 4.71478900  | -1.14435400 | 1.12364300  |
| C  | 5.47064100  | 0.71355000  | -0.24275500 |
| C  | 5.77467400  | -1.92647100 | 0.66525600  |
| H  | 4.01429700  | -1.56274600 | 1.83983700  |
| C  | 6.53585100  | -0.05477800 | -0.70926500 |
| H  | 5.34751200  | 1.73639900  | -0.57982700 |
| C  | 6.67103100  | -1.36740900 | -0.24809400 |
| H  | 5.92113900  | -2.94417500 | 1.00186900  |

|                               |             |             |             |
|-------------------------------|-------------|-------------|-------------|
| H                             | 7.25333400  | 0.33897800  | -1.41687800 |
| N                             | 7.78895800  | -2.18169500 | -0.73186500 |
| O                             | 8.59507700  | -1.65853500 | -1.55298300 |
| O                             | 7.88164500  | -3.37256100 | -0.31488600 |
| O                             | 2.21918000  | -0.85321200 | -1.33590100 |
| H                             | 1.84758800  | -1.74078300 | -1.50603100 |
| H                             | 1.25127900  | -0.88750700 | 0.56146900  |
| H                             | 2.96897500  | 0.57203400  | 2.07386800  |
| H                             | -0.51064800 | -0.02511200 | -0.67176700 |
| <sup>4</sup> INT <sub>4</sub> |             |             |             |
| Fe                            | -2.47144600 | -0.69897200 | 0.31488800  |
| O                             | -1.05409600 | -0.03057700 | -0.66542700 |
| S                             | -4.43209000 | -1.48248600 | 1.49910600  |
| H                             | -4.71284800 | -0.33944900 | 2.22308400  |
| N                             | -3.10564800 | -1.89777800 | -1.18115300 |
| C                             | -4.19832000 | -2.67761800 | -3.07568100 |
| C                             | -3.47365300 | -3.72164100 | -2.57583700 |
| H                             | -4.83924600 | -2.66310000 | -3.94503700 |
| H                             | -3.40142600 | -4.72989800 | -2.95659900 |
| N                             | -1.35206300 | -2.23130800 | 1.01672600  |
| C                             | -1.25181300 | -3.51356000 | 0.51433300  |
| C                             | -0.32482500 | -4.28999800 | 1.30707300  |
| C                             | 0.13893400  | -3.46516700 | 2.29443600  |
| H                             | -0.06984700 | -5.32316300 | 1.12235600  |
| H                             | 0.84844500  | -3.69001700 | 3.07698900  |
| N                             | -1.89578200 | 0.47387000  | 1.85896500  |
| C                             | -0.96276900 | 0.14416300  | 2.82796700  |
| C                             | -2.25941400 | 1.78009800  | 2.10981300  |
| C                             | -0.74087800 | 1.27459900  | 3.70666500  |
| C                             | -1.54506400 | 2.28706000  | 3.26179100  |
| H                             | -0.05869700 | 1.27797200  | 4.54399200  |
| H                             | -1.64917000 | 3.28532800  | 3.66014900  |
| N                             | -3.68380800 | 0.77525900  | -0.31563800 |
| C                             | -4.74985200 | 2.82476600  | -0.57521800 |
| H                             | -5.03489900 | 3.84460800  | -0.36379000 |
| C                             | -3.83442200 | 2.04577400  | 0.23045400  |
| C                             | -3.97526300 | -1.54668400 | -2.19923400 |
| C                             | -2.79082500 | -3.23635800 | -1.39612500 |
| C                             | -0.51054400 | -2.18512900 | 2.11378000  |
| C                             | -3.16968600 | 2.51182100  | 1.35037400  |
| H                             | -3.34881000 | 3.53983900  | 1.64407100  |
| C                             | -4.58372600 | -0.30458100 | -2.34038400 |
| H                             | -5.23402000 | -0.16838700 | -3.19841900 |
| C                             | -1.93539600 | -3.98538600 | -0.60444500 |
| H                             | -1.77420900 | -5.02110000 | -0.88533400 |
| C                             | -0.32433700 | -1.08364400 | 2.94289900  |

|                                       |             |             |             |
|---------------------------------------|-------------|-------------|-------------|
| H                                     | 0.38808200  | -1.19335100 | 3.75331400  |
| C                                     | -5.13629900 | 2.03664500  | -1.61928300 |
| H                                     | -5.80701000 | 2.28084500  | -2.42987200 |
| C                                     | -4.46540900 | 0.76222800  | -1.46392100 |
| C                                     | 1.57804700  | 4.33133600  | -0.60673500 |
| H                                     | 1.11260500  | 5.30575100  | -0.51498200 |
| C                                     | 2.02831000  | 1.26541000  | -0.90100700 |
| C                                     | 2.23318100  | 0.14281700  | 0.17264800  |
| H                                     | 2.84525200  | 1.98001000  | -0.78925600 |
| Cl                                    | 2.83324100  | 4.23103300  | 0.78384500  |
| Cl                                    | 2.44569900  | 4.35130900  | -2.27759700 |
| C                                     | 0.47668600  | 3.27421600  | -0.50617400 |
| O                                     | -0.67442800 | 3.74569900  | -0.32063900 |
| N                                     | 0.73911000  | 1.95135500  | -0.59201300 |
| H                                     | -0.09284300 | 1.30154900  | -0.59588400 |
| C                                     | 2.05542500  | 0.75141100  | -2.30075600 |
| O                                     | 2.13470400  | 0.71911300  | 1.49979900  |
| H                                     | 1.33979000  | 1.29026300  | 1.53660700  |
| C                                     | 3.58995600  | -0.51762300 | 0.05940200  |
| C                                     | 3.78168500  | -1.59821000 | -0.82071500 |
| C                                     | 4.67231600  | -0.05402100 | 0.82708900  |
| C                                     | 5.03136700  | -2.20243100 | -0.94415800 |
| H                                     | 2.94653500  | -1.96065800 | -1.40912300 |
| C                                     | 5.92841500  | -0.64942800 | 0.71405200  |
| H                                     | 4.50842400  | 0.75985200  | 1.52117400  |
| C                                     | 6.09164800  | -1.71679700 | -0.17336000 |
| H                                     | 5.19750300  | -3.03611900 | -1.61336500 |
| H                                     | 6.77284700  | -0.30725600 | 1.29765900  |
| N                                     | 7.40413500  | -2.34959500 | -0.29499700 |
| O                                     | 8.35230300  | -1.90445400 | 0.41543400  |
| O                                     | 7.53041500  | -3.31365400 | -1.10673700 |
| O                                     | 1.24185600  | -0.36233400 | -2.56426500 |
| H                                     | 1.21030800  | -0.57301300 | -3.51627000 |
| H                                     | 2.30190000  | 1.39950700  | -3.13467700 |
| H                                     | 1.44060900  | -0.60077800 | 0.03298000  |
| H                                     | -0.68871700 | -0.65335900 | -1.32576900 |
| <b><sup>2</sup>TS-reb<sub>4</sub></b> |             |             |             |
| Fe                                    | -2.35255000 | -0.74432000 | 0.30429500  |
| O                                     | -0.91904800 | -0.04322100 | -0.78595600 |
| S                                     | -4.20153900 | -1.54719700 | 1.61437100  |
| H                                     | -3.69099700 | -2.79402400 | 1.91950700  |
| N                                     | -1.25729000 | -2.34468100 | 0.84487600  |
| C                                     | -0.20901300 | -4.40935300 | 0.84012100  |
| C                                     | 0.21797600  | -3.74204200 | 1.95573700  |
| H                                     | 0.06123500  | -5.40196900 | 0.51018800  |
| H                                     | 0.91052500  | -4.07860000 | 2.71334200  |

|    |             |             |             |
|----|-------------|-------------|-------------|
| N  | -1.61750600 | 0.28450200  | 1.86974900  |
| C  | -0.73806700 | -0.17915800 | 2.83638100  |
| C  | -0.46135100 | 0.87549400  | 3.78704300  |
| C  | -1.18569200 | 1.96857600  | 3.39907100  |
| H  | 0.20197000  | 0.77608600  | 4.63338800  |
| H  | -1.23819600 | 2.93950200  | 3.86916000  |
| N  | -3.54839300 | 0.79731000  | -0.16721800 |
| C  | -3.59199500 | 2.03155300  | 0.46668300  |
| C  | -4.46909000 | 0.85759600  | -1.20492500 |
| C  | -4.56601400 | 2.87572700  | -0.18357100 |
| C  | -5.11190000 | 2.15145700  | -1.20594200 |
| H  | -4.78535800 | 3.89105500  | 0.11097300  |
| H  | -5.86987100 | 2.45619900  | -1.91247500 |
| N  | -3.03573300 | -1.75654300 | -1.31314000 |
| C  | -4.27388800 | -2.38803700 | -3.16589000 |
| H  | -4.99980700 | -2.32186300 | -3.96308500 |
| C  | -4.03395500 | -1.34943000 | -2.19019400 |
| C  | -1.12659500 | -3.53715900 | 0.14360100  |
| C  | -0.42513900 | -2.44848000 | 1.95315600  |
| C  | -1.92322600 | 1.59376400  | 2.21290800  |
| C  | -4.70445400 | -0.13849200 | -2.14035200 |
| H  | -5.46044400 | 0.05008300  | -2.89423800 |
| C  | -1.77350500 | -3.86031600 | -1.03980000 |
| H  | -1.58403700 | -4.84092900 | -1.46223300 |
| C  | -0.19005000 | -1.45083000 | 2.88676300  |
| H  | 0.49441200  | -1.67124300 | 3.69774600  |
| C  | -2.82651500 | 2.41229600  | 1.55667900  |
| H  | -2.94872000 | 3.42335700  | 1.92482900  |
| C  | -3.43495100 | -3.42543200 | -2.86817100 |
| H  | -3.34148100 | -4.37633700 | -3.37222300 |
| C  | -2.67504600 | -3.04045100 | -1.70004000 |
| C  | 1.65786000  | 4.46477700  | -0.57589100 |
| H  | 1.26325100  | 5.47265300  | -0.51911100 |
| C  | 1.79412600  | 1.31106200  | -0.73242400 |
| C  | 2.09172000  | 0.34360200  | 0.46073800  |
| H  | 2.66851500  | 1.95388600  | -0.88154600 |
| Cl | 2.92189500  | 4.33543600  | 0.80542800  |
| Cl | 2.50033300  | 4.34399500  | -2.24351100 |
| C  | 0.48065000  | 3.50469400  | -0.40224600 |
| O  | -0.63163400 | 4.06347300  | -0.23876000 |
| N  | 0.62986200  | 2.15756300  | -0.39484400 |
| H  | -0.23526600 | 1.58904400  | -0.38949700 |
| C  | 1.49777900  | 0.52418700  | -1.96290900 |
| O  | 2.29391600  | 1.10238500  | 1.67654500  |
| H  | 1.53263800  | 1.70435600  | 1.81302500  |
| C  | 3.34575900  | -0.47043800 | 0.23078100  |

|                                       |             |             |             |
|---------------------------------------|-------------|-------------|-------------|
| C                                     | 3.26098000  | -1.82693800 | -0.12861700 |
| C                                     | 4.61169700  | 0.12697900  | 0.37286000  |
| C                                     | 4.41416200  | -2.57389500 | -0.37132200 |
| H                                     | 2.28924400  | -2.30620800 | -0.19760100 |
| C                                     | 5.77248400  | -0.60679700 | 0.13535700  |
| H                                     | 4.67538300  | 1.16027900  | 0.69173200  |
| C                                     | 5.65620700  | -1.94879000 | -0.24117800 |
| H                                     | 4.36925700  | -3.61915500 | -0.64674100 |
| H                                     | 6.75479400  | -0.16500300 | 0.23823900  |
| N                                     | 6.87001700  | -2.72567400 | -0.49696400 |
| O                                     | 7.98769300  | -2.14866500 | -0.36399400 |
| O                                     | 6.74140700  | -3.93710700 | -0.84175900 |
| O                                     | 1.23294200  | 1.24008000  | -3.10136300 |
| H                                     | 1.09594600  | 0.67986900  | -3.88950900 |
| H                                     | 1.61954000  | -0.54829000 | -2.02892400 |
| H                                     | -1.21005400 | -0.07230700 | -1.72229600 |
| H                                     | 1.22595800  | -0.32054100 | 0.56180400  |
| <b><sup>4</sup>TS-reb<sub>4</sub></b> |             |             |             |
| Fe                                    | -2.35255000 | -0.74432000 | 0.30429500  |
| O                                     | -0.91904800 | -0.04322100 | -0.78595600 |
| S                                     | -4.20153900 | -1.54719700 | 1.61437100  |
| H                                     | -3.69099700 | -2.79402400 | 1.91950700  |
| N                                     | -1.25729000 | -2.34468100 | 0.84487600  |
| C                                     | -0.20901300 | -4.40935300 | 0.84012100  |
| C                                     | 0.21797600  | -3.74204200 | 1.95573700  |
| H                                     | 0.06123500  | -5.40196900 | 0.51018800  |
| H                                     | 0.91052500  | -4.07860000 | 2.71334200  |
| N                                     | -1.61750600 | 0.28450200  | 1.86974900  |
| C                                     | -0.73806700 | -0.17915800 | 2.83638100  |
| C                                     | -0.46135100 | 0.87549400  | 3.78704300  |
| C                                     | -1.18569200 | 1.96857600  | 3.39907100  |
| H                                     | 0.20197000  | 0.77608600  | 4.63338800  |
| H                                     | -1.23819600 | 2.93950200  | 3.86916000  |
| N                                     | -3.54839300 | 0.79731000  | -0.16721800 |
| C                                     | -3.59199500 | 2.03155300  | 0.46668300  |
| C                                     | -4.46909000 | 0.85759600  | -1.20492500 |
| C                                     | -4.56601400 | 2.87572700  | -0.18357100 |
| C                                     | -5.11190000 | 2.15145700  | -1.20594200 |
| H                                     | -4.78535800 | 3.89105500  | 0.11097300  |
| H                                     | -5.86987100 | 2.45619900  | -1.91247500 |
| N                                     | -3.03573300 | -1.75654300 | -1.31314000 |
| C                                     | -4.27388800 | -2.38803700 | -3.16589000 |
| H                                     | -4.99980700 | -2.32186300 | -3.96308500 |
| C                                     | -4.03395500 | -1.34943000 | -2.19019400 |
| C                                     | -1.12659500 | -3.53715900 | 0.14360100  |
| C                                     | -0.42513900 | -2.44848000 | 1.95315600  |

|                                     |             |             |             |
|-------------------------------------|-------------|-------------|-------------|
| C                                   | -1.92322600 | 1.59376400  | 2.21290800  |
| C                                   | -4.70445400 | -0.13849200 | -2.14035200 |
| H                                   | -5.46044400 | 0.05008300  | -2.89423800 |
| C                                   | -1.77350500 | -3.86031600 | -1.03980000 |
| H                                   | -1.58403700 | -4.84092900 | -1.46223300 |
| C                                   | -0.19005000 | -1.45083000 | 2.88676300  |
| H                                   | 0.49441200  | -1.67124300 | 3.69774600  |
| C                                   | -2.82651500 | 2.41229600  | 1.55667900  |
| H                                   | -2.94872000 | 3.42335700  | 1.92482900  |
| C                                   | -3.43495100 | -3.42543200 | -2.86817100 |
| H                                   | -3.34148100 | -4.37633700 | -3.37222300 |
| C                                   | -2.67504600 | -3.04045100 | -1.70004000 |
| C                                   | 1.65786000  | 4.46477700  | -0.57589100 |
| H                                   | 1.26325100  | 5.47265300  | -0.51911100 |
| C                                   | 1.79412600  | 1.31106200  | -0.73242400 |
| C                                   | 2.09172000  | 0.34360200  | 0.46073800  |
| H                                   | 2.66851500  | 1.95388600  | -0.88154600 |
| Cl                                  | 2.92189500  | 4.33543600  | 0.80542800  |
| Cl                                  | 2.50033300  | 4.34399500  | -2.24351100 |
| C                                   | 0.48065000  | 3.50469400  | -0.40224600 |
| O                                   | -0.63163400 | 4.06347300  | -0.23876000 |
| N                                   | 0.62986200  | 2.15756300  | -0.39484400 |
| H                                   | -0.23526600 | 1.58904400  | -0.38949700 |
| C                                   | 1.49777900  | 0.52418700  | -1.96290900 |
| O                                   | 2.29391600  | 1.10238500  | 1.67654500  |
| H                                   | 1.53263800  | 1.70435600  | 1.81302500  |
| C                                   | 3.34575900  | -0.47043800 | 0.23078100  |
| C                                   | 3.26098000  | -1.82693800 | -0.12861700 |
| C                                   | 4.61169700  | 0.12697900  | 0.37286000  |
| C                                   | 4.41416200  | -2.57389500 | -0.37132200 |
| H                                   | 2.28924400  | -2.30620800 | -0.19760100 |
| C                                   | 5.77248400  | -0.60679700 | 0.13535700  |
| H                                   | 4.67538300  | 1.16027900  | 0.69173200  |
| C                                   | 5.65620700  | -1.94879000 | -0.24117800 |
| H                                   | 4.36925700  | -3.61915500 | -0.64674100 |
| H                                   | 6.75479400  | -0.16500300 | 0.23823900  |
| N                                   | 6.87001700  | -2.72567400 | -0.49696400 |
| O                                   | 7.98769300  | -2.14866500 | -0.36399400 |
| O                                   | 6.74140700  | -3.93710700 | -0.84175900 |
| O                                   | 1.23294200  | 1.24008000  | -3.10136300 |
| H                                   | 1.09594600  | 0.67986900  | -3.88950900 |
| H                                   | 1.61954000  | -0.54829000 | -2.02892400 |
| H                                   | -1.21005400 | -0.07230700 | -1.72229600 |
| H                                   | 1.22595800  | -0.32054100 | 0.56180400  |
| <b><sup>2</sup>P-OH<sub>4</sub></b> |             |             |             |
| Fe                                  | 2.06448200  | 1.10518400  | 0.21729000  |



|    |             |             |             |
|----|-------------|-------------|-------------|
| O  | 0.60309300  | -0.21537300 | -0.51874200 |
| S  | 3.65655600  | 2.53418000  | 1.02878800  |
| H  | 4.71581300  | 2.10090900  | 0.25430400  |
| N  | 2.62913700  | 1.39827000  | -1.69321500 |
| C  | 3.74381600  | 1.30485200  | -3.72793600 |
| C  | 2.83987800  | 2.32517200  | -3.81014200 |
| H  | 4.43842000  | 0.96292700  | -4.48133900 |
| H  | 2.65032700  | 2.98591700  | -4.64358900 |
| N  | 0.71725000  | 2.61015400  | 0.09904900  |
| C  | 0.52118900  | 3.43391800  | -1.00201900 |
| C  | -0.43666600 | 4.47052300  | -0.67433000 |
| C  | -0.79940400 | 4.28700800  | 0.63036100  |
| H  | -0.76495100 | 5.24043900  | -1.35752800 |
| H  | -1.48449000 | 4.87605500  | 1.22284800  |
| N  | 1.38955300  | 0.72865400  | 2.08623700  |
| C  | 0.49839500  | 1.47810000  | 2.84327100  |
| C  | 1.83262400  | -0.29455100 | 2.91354800  |
| C  | 0.36630000  | 0.89937400  | 4.16345500  |
| C  | 1.18244100  | -0.19674900 | 4.20488000  |
| H  | -0.26196600 | 1.29555200  | 4.94826500  |
| H  | 1.35339400  | -0.87311600 | 5.02990700  |
| N  | 3.29726300  | -0.48405300 | 0.29030800  |
| C  | 4.47001500  | -2.32842800 | 1.07106200  |
| H  | 4.77256800  | -3.11665000 | 1.74440900  |
| C  | 3.46001000  | -1.33471100 | 1.37394200  |
| C  | 3.61154400  | 0.72540500  | -2.40806700 |
| C  | 2.14858300  | 2.38810000  | -2.53819100 |
| C  | -0.07800500 | 3.12954900  | 1.11390500  |
| C  | 2.77449700  | -1.25896500 | 2.57773400  |
| H  | 3.00941600  | -2.00649100 | 3.32747100  |
| C  | 4.34684700  | -0.35177300 | -1.93436600 |
| H  | 5.08548000  | -0.78872700 | -2.59751900 |
| C  | 1.16583200  | 3.31685100  | -2.22630800 |
| H  | 0.90240800  | 4.03567700  | -2.99515900 |
| C  | -0.18227100 | 2.60324000  | 2.39445500  |
| H  | -0.83648800 | 3.11009400  | 3.09611700  |
| C  | 4.92618800  | -2.06811700 | -0.18895700 |
| H  | 5.68027700  | -2.59890800 | -0.75155700 |
| C  | 4.19248400  | -0.91949900 | -0.67768500 |
| C  | -0.06444500 | -4.25674800 | -0.92828200 |
| H  | 0.55550300  | -5.14087800 | -1.02197300 |
| C  | -1.32855600 | -1.61559600 | 0.18139000  |
| C  | -2.52016900 | -1.50713700 | 1.17633600  |
| H  | -1.68158100 | -2.10112200 | -0.72845700 |
| Cl | -1.81980100 | -4.82589600 | -1.15735700 |
| Cl | 0.45599600  | -3.14041100 | -2.36684300 |

|                                     |             |             |             |
|-------------------------------------|-------------|-------------|-------------|
| C                                   | 0.24786300  | -3.61972200 | 0.42324600  |
| O                                   | 1.06288400  | -4.24418600 | 1.13799200  |
| N                                   | -0.27303300 | -2.42049500 | 0.78982500  |
| H                                   | 0.12137700  | -2.06983000 | 1.65800500  |
| C                                   | -0.80361300 | -0.20990400 | -0.19987600 |
| O                                   | -2.91035800 | -2.88419400 | 1.42597500  |
| H                                   | -3.64469700 | -2.91938200 | 2.07152000  |
| C                                   | -3.68877100 | -0.68311500 | 0.66952800  |
| C                                   | -3.90164600 | 0.62095200  | 1.14598500  |
| C                                   | -4.57916600 | -1.22955900 | -0.27155700 |
| C                                   | -4.97314500 | 1.38297300  | 0.68037500  |
| H                                   | -3.22613200 | 1.04523200  | 1.88282900  |
| C                                   | -5.65526800 | -0.48178100 | -0.74442700 |
| H                                   | -4.42425000 | -2.24263200 | -0.62401900 |
| C                                   | -5.83481900 | 0.81806600  | -0.26191400 |
| H                                   | -5.15391700 | 2.38951200  | 1.03339300  |
| H                                   | -6.34851400 | -0.88091700 | -1.47286600 |
| N                                   | -6.96407900 | 1.61105800  | -0.75439800 |
| O                                   | -7.74124500 | 1.08001700  | -1.59853400 |
| O                                   | -7.10371100 | 2.78757600  | -0.31052800 |
| O                                   | -1.58229900 | 0.22764800  | -1.30686800 |
| H                                   | -1.40782600 | 1.17446900  | -1.48900600 |
| H                                   | -0.85649500 | 0.48320400  | 0.63970700  |
| H                                   | -2.13559800 | -1.05002600 | 2.10262600  |
| H                                   | 0.85026200  | -0.84913400 | -1.22267500 |
| <b><sup>4</sup>P-OH<sub>4</sub></b> |             |             |             |
| Fe                                  | 2.67918800  | 0.01480100  | 0.38662500  |
| O                                   | -0.10725800 | -0.22900000 | -1.54413400 |
| S                                   | 4.70651600  | -0.33005200 | 1.52660000  |
| H                                   | 4.77713900  | -1.70671800 | 1.42207500  |
| N                                   | 3.40273200  | 0.25348300  | -1.55773300 |
| C                                   | 4.34714000  | -0.19369300 | -3.62309500 |
| C                                   | 4.48646700  | 1.14814000  | -3.39641800 |
| H                                   | 4.67183300  | -0.76009800 | -4.48385900 |
| H                                   | 4.94699500  | 1.88643700  | -4.03666200 |
| N                                   | 2.71737000  | 2.02135600  | 0.62690800  |
| C                                   | 3.37260900  | 2.93172500  | -0.19281500 |
| C                                   | 3.34197200  | 4.24113500  | 0.42894100  |
| C                                   | 2.65992000  | 4.11846200  | 1.60653700  |
| H                                   | 3.77539500  | 5.13296700  | 0.00048500  |
| H                                   | 2.42901100  | 4.89055300  | 2.32584300  |
| N                                   | 1.34406800  | -0.11976100 | 2.00027300  |
| C                                   | 1.02153100  | 0.90436900  | 2.87591900  |
| C                                   | 0.80079000  | -1.28292000 | 2.52185200  |
| C                                   | 0.20870000  | 0.37598800  | 3.95408700  |
| C                                   | 0.07258100  | -0.97271800 | 3.73566400  |

|    |             |             |             |
|----|-------------|-------------|-------------|
| H  | -0.17299700 | 0.95592700  | 4.78235200  |
| H  | -0.44678000 | -1.69749100 | 4.34594500  |
| N  | 2.28417000  | -1.92719900 | -0.04661700 |
| C  | 1.77317800  | -4.17513100 | 0.21858800  |
| H  | 1.33698500  | -5.06436200 | 0.64772800  |
| C  | 1.66332400  | -2.85438800 | 0.79883300  |
| C  | 3.67978000  | -0.75512100 | -2.46356000 |
| C  | 3.90693400  | 1.42463700  | -2.09522100 |
| C  | 2.25800600  | 2.73125500  | 1.73177200  |
| C  | 0.96719500  | -2.55228000 | 1.96714000  |
| H  | 0.48294700  | -3.38306600 | 2.46846200  |
| C  | 3.40439000  | -2.10403400 | -2.25270300 |
| H  | 3.70103200  | -2.79766100 | -3.03264000 |
| C  | 3.90680700  | 2.65752700  | -1.44938500 |
| H  | 4.36249400  | 3.48961400  | -1.97624400 |
| C  | 1.46584700  | 2.21961400  | 2.75482700  |
| H  | 1.16222200  | 2.91560200  | 3.53012000  |
| C  | 2.45959700  | -4.05098500 | -0.95805700 |
| H  | 2.70890800  | -4.82873500 | -1.66494400 |
| C  | 2.77851600  | -2.65099100 | -1.13549000 |
| C  | -3.82321800 | -3.70629700 | -0.09814200 |
| H  | -4.03276900 | -4.73061700 | 0.18749700  |
| C  | -2.24362500 | -0.99303400 | -0.51845000 |
| C  | -2.07270100 | 0.10941500  | 0.57213100  |
| H  | -3.30097300 | -1.09945700 | -0.76333600 |
| Cl | -5.04143500 | -2.65994500 | 0.86550000  |
| Cl | -4.18619400 | -3.59959700 | -1.92735400 |
| C  | -2.36599600 | -3.43558500 | 0.26419600  |
| O  | -1.76598700 | -4.38563900 | 0.82664500  |
| N  | -1.74272300 | -2.26200400 | -0.00145500 |
| H  | -0.78807400 | -2.25478900 | 0.34337200  |
| C  | -1.48910900 | -0.58387100 | -1.80067600 |
| O  | -2.70232900 | -0.40507300 | 1.77550200  |
| H  | -2.21445500 | -0.09795100 | 2.56607700  |
| C  | -2.67613800 | 1.44630900  | 0.17358900  |
| C  | -1.87557800 | 2.44792500  | -0.40624900 |
| C  | -4.04285500 | 1.69340600  | 0.39435000  |
| C  | -2.42974700 | 3.67528300  | -0.77121200 |
| H  | -0.81933500 | 2.26122900  | -0.57206000 |
| C  | -4.60917800 | 2.91516600  | 0.03304200  |
| H  | -4.64463700 | 0.92838000  | 0.87025000  |
| C  | -3.79207300 | 3.89021700  | -0.54727800 |
| H  | -1.83112300 | 4.45977000  | -1.21482200 |
| H  | -5.65833600 | 3.12508600  | 0.19416900  |
| N  | -4.37812100 | 5.17797800  | -0.92390300 |
| O  | -5.61172700 | 5.35811600  | -0.70933200 |

|   |             |             |             |
|---|-------------|-------------|-------------|
| O | -3.62164700 | 6.04804700  | -1.44608800 |
| O | -1.58223600 | -1.66328700 | -2.72631200 |
| H | -1.25145000 | -1.38526900 | -3.60451400 |
| H | -1.91899800 | 0.33704000  | -2.20124300 |
| H | -0.99737300 | 0.23985100  | 0.73097000  |
| H | 0.43550800  | -1.01746500 | -1.32021000 |
